# Supplementary material for: Impact of infection in patients with non-ST elevation acute coronary syndrome undergoing percutaneous coronary intervention: insight from a multicentre observational cohort from China
Source: PubMed Central journal article supplement — BMJ Open. 2020 Sep 14;10(9):e038551. doi: 10.1136/bmjopen-2020-038551 (PMC7490952; doi:10.1136/bmjopen-2020-038551), 2020-09-14

## **Supplementary Appendix 1**

**Table S1.** Univariate and multivariable logistic for clinical outcomes by stratifying infection subtype.

**Table S2** Propensity Score Analyses

**Table S3** Outcomes of Propensity Score Analyses

**Figure S1.** Time from hospital admission to the diagnosis of infection among all patients.

**Figure S2.** Kaplan-Meier estimated event rates of all cause death or major bleeding

**Figure S3.** Subgroup analysis of in-hospital all cause death

**Figure S4.** Subgroup analysis of in-hospital major bleeding

**Figure S5.** Subgroup analysis of in-hospital major adverse clinical events

**Figure S6.** Distributions of propensity scores between the two groups before and after matching (the first row is the density plots and the second row is the QQ plots)

**Table S1 Univariate and multivariable logistic for clinical outcomes by stratifying infection subtype.**

| <b>Outcomes</b><br>(Compare with uninfected patients) | <b>Univariate analysis</b> |              |                | <b>Multivariable analysis</b> |              |               |
|-------------------------------------------------------|----------------------------|--------------|----------------|-------------------------------|--------------|---------------|
|                                                       | <b>OR</b>                  | <b>95%CI</b> | <b>P value</b> | <b>OR</b>                     | <b>95%CI</b> | <b>Pvalue</b> |
| <b>Model 1</b>                                        |                            |              |                |                               |              |               |
| <b>In hospital</b>                                    |                            |              |                |                               |              |               |
| <b>Death</b>                                          |                            |              |                |                               |              |               |
| Community acquired pulmonary infections               | 17.24                      | 4.66~63.73   | <.001          | 8.56                          | 2.06~35.57   | 0.003         |
| Hospital acquired pulmonary infections                | 23.25                      | 4.95~109.28  | <.001          | 11.51                         | 2.15~61.49   | 0.004         |
| Urinary tract infection                               | 31.24                      | 3.78~258.58  | 0.001          | 21.59                         | 2.32~200.48  | 0.007         |
| Other infection                                       | 29.99                      | 8.01~112.27  | <.001          | 23.14                         | 5.59~95.86   | <.001         |
| <b>Major Bleeding</b>                                 |                            |              |                |                               |              |               |
| Community acquired pulmonary infections               | 28.32                      | 16.54~48.48  | <.001          | 18.13                         | 9.92~33.16   | <.001         |
| Hospital acquired pulmonary infections                | 14.80                      | 6.37~34.43   | <.001          | 9.04                          | 3.63~22.49   | <.001         |
| Urinary tract infection                               | 5.16                       | 0.67~39.50   | 0.114          | 3.10                          | 0.39~24.51   | 0.283         |
| Other infection                                       | 4.95                       | 1.50~16.31   | 0.009          | 3.25                          | 0.95~11.13   | 0.061         |
| <b>Death or MI or Major Bleeding</b>                  |                            |              |                |                               |              |               |
| Community acquired pulmonary infections               | 21.85                      | 13.05~36.59  | <.001          | 14.23                         | 8.07~25.10   | <.001         |
| Hospital acquired pulmonary infections                | 16.69                      | 8.01~34.77   | <.001          | 11.28                         | 5.14~24.76   | <.001         |
| Urinary tract infection                               | 3.76                       | 0.49~28.65   | 0.202          | 2.44                          | 0.31~19.04   | 0.396         |
| Other infection                                       | 6.26                       | 2.43~16.13   | <.001          | 4.51                          | 1.69~12.01   | 0.003         |
| <b>Follow up</b>                                      |                            |              |                |                               |              |               |
| <b>Death</b>                                          |                            |              |                |                               |              |               |
| Community acquired pulmonary infections               | 5.52                       | 3.78~8.06    | <.001          | 2.06                          | 1.39~3.06    | <.001         |
| Hospital acquired pulmonary infections                | 6.16                       | 3.78~10.02   | <.001          | 2.57                          | 1.56~4.24    | <.001         |
| Urinary tract infection                               | 3.66                       | 1.37~9.82    | 0.010          | 2.38                          | 0.88~6.39    | 0.086         |
| Other infection                                       | 2.62                       | 1.44~4.79    | 0.002          | 1.45                          | 0.79~2.66    | 0.232         |
| <b>Major Bleeding</b>                                 |                            |              |                |                               |              |               |
| Community acquired pulmonary infections               | 14.29                      | 9.26~22.06   | <.001          | 8.86                          | 5.49~14.27   | <.001         |
| Hospital acquired pulmonary infections                | 7.08                       | 3.30~15.20   | <.001          | 4.16                          | 1.87~9.27    | <.001         |

| Outcomes<br>(Compare with uninfected patients) | Univariate analysis |             |         | Multivariable analysis |             |        |
|------------------------------------------------|---------------------|-------------|---------|------------------------|-------------|--------|
|                                                | OR                  | 95%CI       | P value | OR                     | 95%CI       | Pvalue |
| Urinary tract infection                        | 2.54                | 0.35~18.13  | 0.354   | 1.66                   | 0.23~11.98  | 0.616  |
| Other infection                                | 2.49                | 0.79~7.83   | 0.119   | 1.83                   | 0.57~5.85   | 0.307  |
| <b>Death or Major Bleeding</b>                 |                     |             |         |                        |             |        |
| Community acquired pulmonary infections        | 6.83                | 4.99~9.35   | <.001   | 2.85                   | 2.05~3.97   | <.001  |
| Hospital acquired pulmonary infections         | 6.32                | 4.08~9.79   | <.001   | 2.93                   | 1.87~4.61   | <.001  |
| Urinary tract infection                        | 2.85                | 1.07~7.64   | 0.037   | 1.78                   | 0.66~4.78   | 0.253  |
| Other infection                                | 2.62                | 1.51~4.55   | 0.001   | 1.60                   | 0.92~2.80   | 0.099  |
| <b>Model 2</b>                                 |                     |             |         |                        |             |        |
| <b>In hospital</b>                             |                     |             |         |                        |             |        |
| <b>Death</b>                                   |                     |             |         |                        |             |        |
| Community acquired pulmonary infections        | 17.24               | 4.66~63.73  | <.001   | 2.01                   | 0.37~10.86  | 0.418  |
| Hospital acquired pulmonary infections         | 23.25               | 4.95~109.28 | <.001   | 6.48                   | 0.92~45.66  | 0.061  |
| Urinary tract infection                        | 31.24               | 3.78~258.58 | 0.001   | 14.68                  | 0.96~223.51 | 0.053  |
| Other infection                                | 29.99               | 8.01~112.27 | <.001   | 5.02                   | 0.98~25.62  | 0.052  |
| <b>Major Bleeding</b>                          |                     |             |         |                        |             |        |
| Community acquired pulmonary infections        | 28.32               | 16.54~48.48 | <.001   | 11.91                  | 6.10~23.28  | <.001  |
| Hospital acquired pulmonary infections         | 14.80               | 6.37~34.43  | <.001   | 7.47                   | 2.80~19.90  | <.001  |
| Urinary tract infection                        | 5.16                | 0.67~39.50  | 0.114   | 1.92                   | 0.15~25.23  | 0.619  |
| Other infection                                | 4.95                | 1.50~16.31  | 0.009   | 1.05                   | 0.26~4.23   | 0.942  |
| <b>Death or MI or Major Bleeding</b>           |                     |             |         |                        |             |        |
| Community acquired pulmonary infections        | 21.85               | 13.05~36.59 | <.001   | 9.69                   | 5.12~18.37  | <.001  |
| Hospital acquired pulmonary infections         | 16.69               | 8.01~34.77  | <.001   | 10.00                  | 4.33~23.12  | <.001  |
| Urinary tract infection                        | 3.76                | 0.49~28.65  | 0.202   | 1.59                   | 0.13~19.16  | 0.713  |
| Other infection                                | 6.26                | 2.43~16.13  | <.001   | 1.71                   | 0.54~5.35   | 0.360  |
| <b>Follow up</b>                               |                     |             |         |                        |             |        |
| <b>Death</b>                                   |                     |             |         |                        |             |        |
| Community acquired pulmonary infections        | 5.52                | 3.78~8.06   | <.001   | 2.70                   | 1.81~4.03   | <.001  |
| Hospital acquired pulmonary infections         | 6.16                | 3.78~10.02  | <.001   | 3.56                   | 2.15~5.90   | <.001  |
| Urinary tract infection                        | 3.66                | 1.37~9.82   | 0.010   | 2.90                   | 1.08~7.80   | 0.034  |

| <b>Outcomes</b><br>(Compare with uninfected patients) | <b>Univariate analysis</b> |              |                | <b>Multivariable analysis</b> |              |               |
|-------------------------------------------------------|----------------------------|--------------|----------------|-------------------------------|--------------|---------------|
|                                                       | <b>OR</b>                  | <b>95%CI</b> | <b>P value</b> | <b>OR</b>                     | <b>95%CI</b> | <b>Pvalue</b> |
| Other infection                                       | 2.62                       | 1.44~4.79    | 0.002          | 1.32                          | 0.71~2.44    | 0.376         |
| <b>Major Bleeding</b>                                 | 14.29                      | 9.26~22.06   | <.001          | 6.30                          | 3.79~10.49   | <.001         |
| Community acquired pulmonary infections               | 7.08                       | 3.30~15.20   | <.001          | 3.51                          | 1.57~7.84    | 0.002         |
| Hospital acquired pulmonary infections                | 2.54                       | 0.35~18.13   | 0.354          | 1.42                          | 0.19~10.39   | 0.731         |
| Urinary tract infection                               | 2.49                       | 0.79~7.83    | 0.119          | 1.01                          | 0.31~3.29    | 0.981         |
| Other infection                                       |                            |              |                |                               |              |               |
| <b>Death or Major Bleeding</b>                        |                            |              |                |                               |              |               |
| Community acquired pulmonary infections               | 6.83                       | 4.99~9.35    | <.001          | 3.55                          | 2.55~4.94    | <.001         |
| Hospital acquired pulmonary infections                | 6.32                       | 4.08~9.79    | <.001          | 3.46                          | 2.20~5.45    | <.001         |
| Urinary tract infection                               | 2.85                       | 1.07~7.64    | 0.037          | 1.96                          | 0.73~5.28    | 0.181         |
| Other infection                                       | 2.62                       | 1.51~4.55    | 0.001          | 1.38                          | 0.78~2.41    | 0.266         |

Model 1 included age, gender, current smokers, heart failure, anemia, type of disease, estimate glomerular filtration rate.

Model 2 included diabetes mellitus, hypertension, prior myocardial infarction, prior stroke, radial access, chronic kidney disease, intra-aortic balloon pump.

**Table S2 Propensity Score Analyses**

|                                        | Propensity Score Analyses |              |              | <i>P</i> value |
|----------------------------------------|---------------------------|--------------|--------------|----------------|
|                                        | Uninfected                | Infected     | Total        |                |
|                                        | (N=592)                   | (N=148)      | (N=740)      |                |
| Demographics                           |                           |              |              |                |
| Age, y                                 | 70.39±9.09                | 70.24±9.15   | 70.36±9.09   | 0.861          |
| Age ≥ 65 y                             | 444(75.0%)                | 110(74.3%)   | 554(74.9%)   | 0.865          |
| Female                                 | 166(28.0%)                | 37(25.0%)    | 203(27.4%)   | 0.458          |
| Weight, kg                             | 63.25±12.22               | 63.99±12.03  | 63.40±12.18  | 0.510          |
| Heart rate, bpm                        | 75.01±12.30               | 75.37±12.80  | 75.08±12.40  | 0.751          |
| Blood pressure, mmHg                   |                           |              |              |                |
| Systolic                               | 137.48±21.34              | 137.12±21.66 | 137.41±21.39 | 0.854          |
| Diastolic                              | 76.07±11.68               | 76.00±11.13  | 76.06±11.56  | 0.944          |
| Medical history and risk factors, n(%) |                           |              |              |                |
| Current Smoker                         | 157(26.5%)                | 41(27.7%)    | 198(26.8%)   | 0.771          |
| Myocardial Infarction                  | 126(21.3%)                | 29(19.6%)    | 155(20.9%)   | 0.651          |
| Percutaneous coronary intervention     | 100(16.9%)                | 25(16.9%)    | 125(16.9%)   | 1              |
| Coronary-artery bypass surgery         | 10(1.7%)                  | 4(2.7%)      | 14(1.9%)     | 0.418          |
| Stroke                                 | 36(6.1%)                  | 9(6.1%)      | 45(6.1%)     | 1              |
| Atrial Fibrillation                    | 19(3.2%)                  | 5(3.4%)      | 24(3.2%)     | 0.917          |
| Hypertension                           | 445(75.2%)                | 111(75.0%)   | 556(75.1%)   | 0.966          |
| Diabetes mellitus                      | 248(41.9%)                | 67(45.3%)    | 315(42.6%)   | 0.457          |
| Type of disease, n(%)                  |                           |              |              |                |
| NSTEMI                                 | 225(38.0%)                | 60(40.5%)    | 285(38.5%)   | 0.571          |
| Unstable angina                        | 367(62.0%)                | 88(59.5%)    | 455(61.5%)   | NA             |
| Heart Failure, n(%)                    | 123(20.8%)                | 32(21.6%)    | 155(20.9%)   | 0.821          |

| <b>Propensity Score Analyses</b> |                   |                 |                |                |
|----------------------------------|-------------------|-----------------|----------------|----------------|
|                                  | <b>Uninfected</b> | <b>Infected</b> | <b>Total</b>   | <b>P value</b> |
|                                  | <b>(N=592)</b>    | <b>(N=148)</b>  | <b>(N=740)</b> |                |
| LVEF, %                          | 59.67±12.02       | 57.81±13.16     | 59.29±12.28    | 0.118          |
| eGFR, mL/min/1.73m <sup>2</sup>  | 65.65±26.10       | 66.66±28.13     | 65.85±26.50    | 0.678          |
| eGFR ≤ 60, n(%)                  | 234(39.5%)        | 58(39.2%)       | 292(39.5%)     | 0.940          |
| Serum creatinine, μmol/dL        | 1.39±1.16         | 1.43±1.32       | 1.40±1.19      | 0.726          |
| Hematocrit, g/L                  | 0.36±0.05         | 0.37±0.05       | 0.36±0.05      | 0.690          |
| Anemia, n(%)                     | 337(56.9%)        | 81(54.7%)       | 418(56.5%)     | 0.630          |
| Cardiac biomarker positive, n(%) | 344(61.5%)        | 84(59.2%)       | 428(61.1%)     | 0.603          |
| In hospital medication, n(%)     |                   |                 |                |                |
| Dual antiplatelet therapy        | 558(94.3%)        | 138(93.2%)      | 696(94.1%)     | 0.641          |
| Statin                           | 576(97.3%)        | 145(98.0%)      | 721(97.4%)     | 0.642          |
| ACE inhibitor or ARB             | 487(82.3%)        | 123(83.1%)      | 610(82.4%)     | 0.809          |
| Calcium-channel blocker          | 200(33.8%)        | 46(31.1%)       | 246(33.2%)     | 0.532          |
| β-blocker                        | 488(82.4%)        | 120(81.1%)      | 608(82.2%)     | 0.701          |
| Procedure characteristics, n(%)  |                   |                 |                |                |
| Radial access                    | 486(82.1%)        | 116(78.4%)      | 602(81.4%)     | 0.299          |
| Coronary anatomy                 |                   |                 |                |                |
| Any left main                    | 117(19.8%)        | 26(17.6%)       | 143(19.3%)     | 0.786          |
| Multi-vessel disease             | 363(61.3%)        | 95(64.2%)       | 458(61.9%)     |                |
| Others                           | 112(18.9%)        | 27(18.2%)       | 139(18.8%)     |                |
| Treated vessel                   |                   |                 |                |                |
| Any left main                    | 77(13.0%)         | 17(11.5%)       | 94(12.7%)      | 0.708          |
| Multi-vessel                     | 209(35.3%)        | 49(33.1%)       | 258(34.9%)     |                |
| Others                           | 306(51.7%)        | 82(55.4%)       | 388(52.4%)     |                |

| <b>Propensity Score Analyses</b> |                   |                 |                |                |
|----------------------------------|-------------------|-----------------|----------------|----------------|
|                                  | <b>Uninfected</b> | <b>Infected</b> | <b>Total</b>   | <b>P value</b> |
|                                  | <b>(N=592)</b>    | <b>(N=148)</b>  | <b>(N=740)</b> |                |
| Stent type                       |                   |                 |                |                |
| Drug eluting stent               | 592(100.0%)       | 148(100.0%)     | 740(100.0%)    | 1              |
| Number of stents                 | 2.26±1.29         | 2.27±1.38       | 2.26±1.31      | 0.933          |
| Total length of stents           | 56.48±35.90       | 58.22±38.71     | 56.83±36.46    | 0.604          |
| Thrombus aspiration              | 16(2.7%)          | 3(2.0%)         | 19(2.6%)       | 0.642          |
| Time to procedure                |                   |                 |                |                |
| In 24 hours                      | 253(42.7%)        | 59(39.9%)       | 312(42.2%)     | 0.816          |
| 24~72 hours                      | 135(22.8%)        | 35(23.6%)       | 170(23.0%)     |                |
| > 72 hours                       | 204(34.5%)        | 54(36.5%)       | 258(34.9%)     |                |

\*Abbreviations: NSTEMI=Non-ST elevation myocardial infarction; LVEF=left ventricular ejection fraction; eGFR=Estimate glomerular filtration rate; ACE=angiotensin-converting enzyme; ARB=angiotensin receptor blocker.



**Table S3 Outcomes of Propensity Score Analyses**

| <b>Outcomes</b>                     | <b>Logistics analysis</b> |              |                |
|-------------------------------------|---------------------------|--------------|----------------|
|                                     | <b>OR/HR</b>              | <b>95%CI</b> | <b>P value</b> |
| In-hospital Death                   | 4.01                      | 0.25~64.30   | 0.981          |
| In-hospital Major bleeding          | 18                        | 2.40~134.8   | 0.005          |
| In-hospital MI                      | 2.0                       | 0.18~22.20   | 0.57           |
| In-hospital Death or Major bleeding | 17.24                     | 4.66~63.73   | <.001          |
| Follow-up Death                     | 2                         | 0.97~4.12    | 0.06           |
| Follow-up Major bleeding            | 5.33                      | 1.55~18.30   | 0.007          |
| Follow-up Death or Major bleeding   | 2.46                      | 1.29~4.69    | 0.006          |

**Figure S1.** Time from hospital admission to the diagnosis of infection among all patients.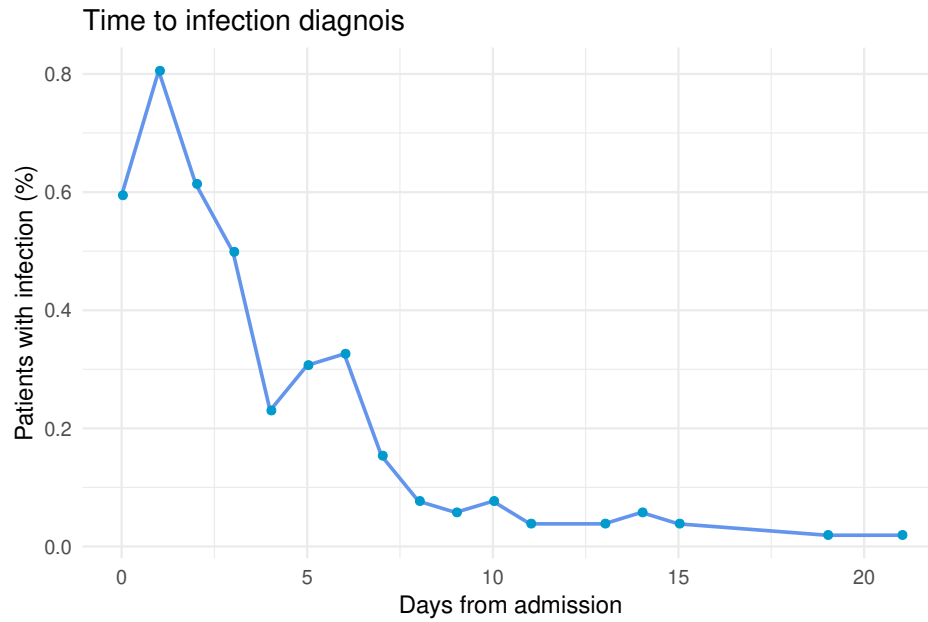

**Figure S2.** Kaplan-Meier estimated event rates of all cause death or major bleeding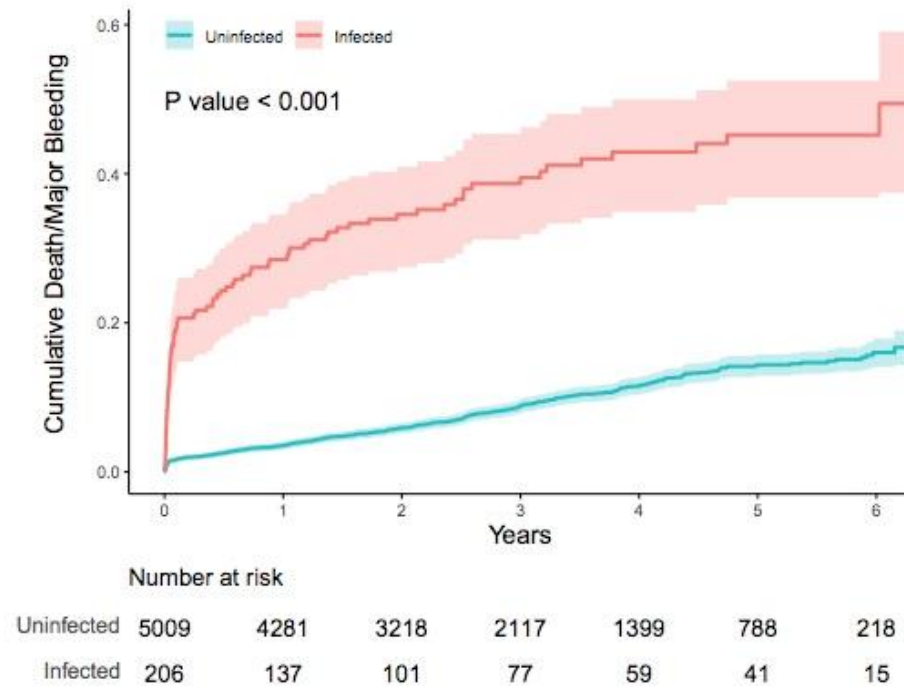

**Figure S3.** Subgroup analysis of in-hospital all cause death

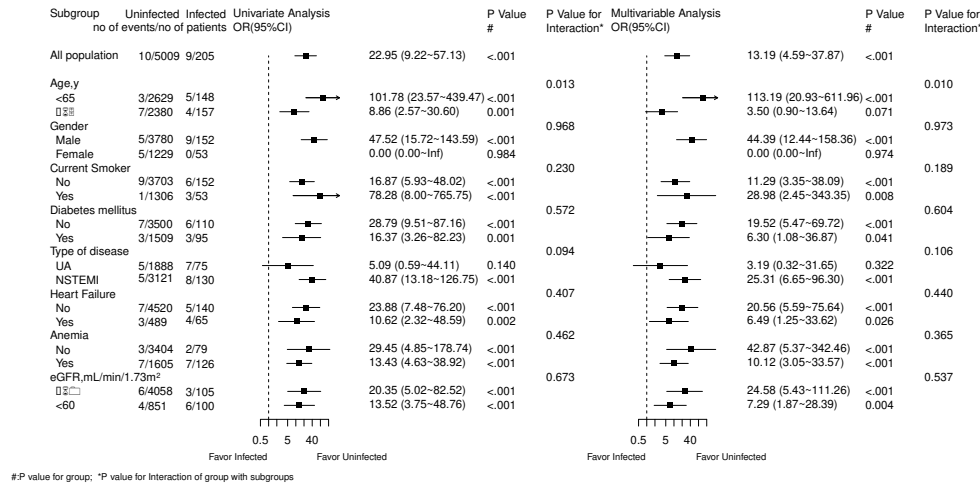

**Figure S4.** Subgroup analysis of in-hospital major bleeding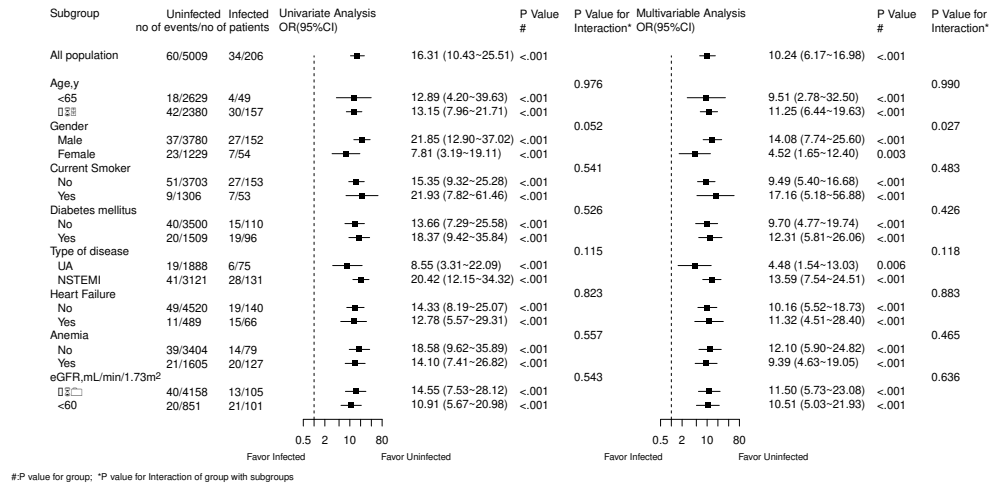

**Figure S5.** Subgroup analysis of in-hospital major adverse clinical events

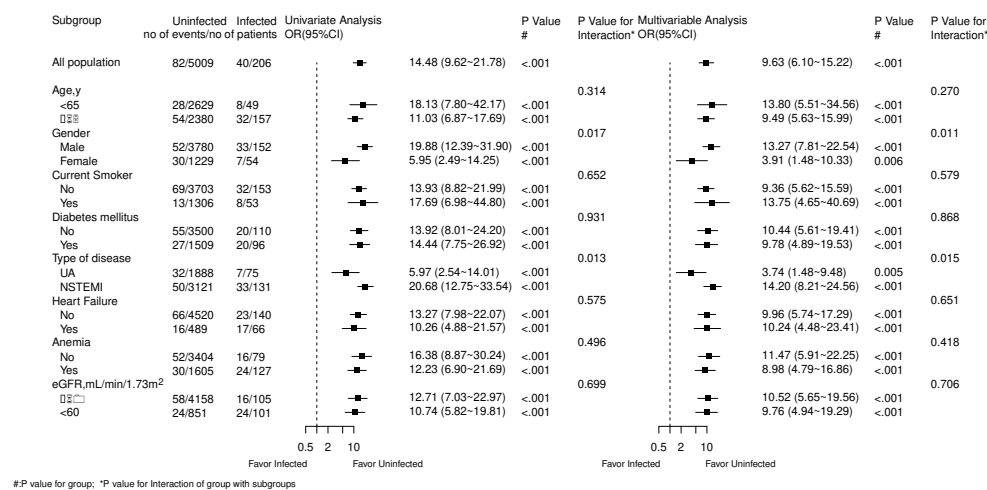

**Figure S6.** Distributions of propensity scores between the two groups before and after matching (the first row is the density plots and the second row is the QQ plots)

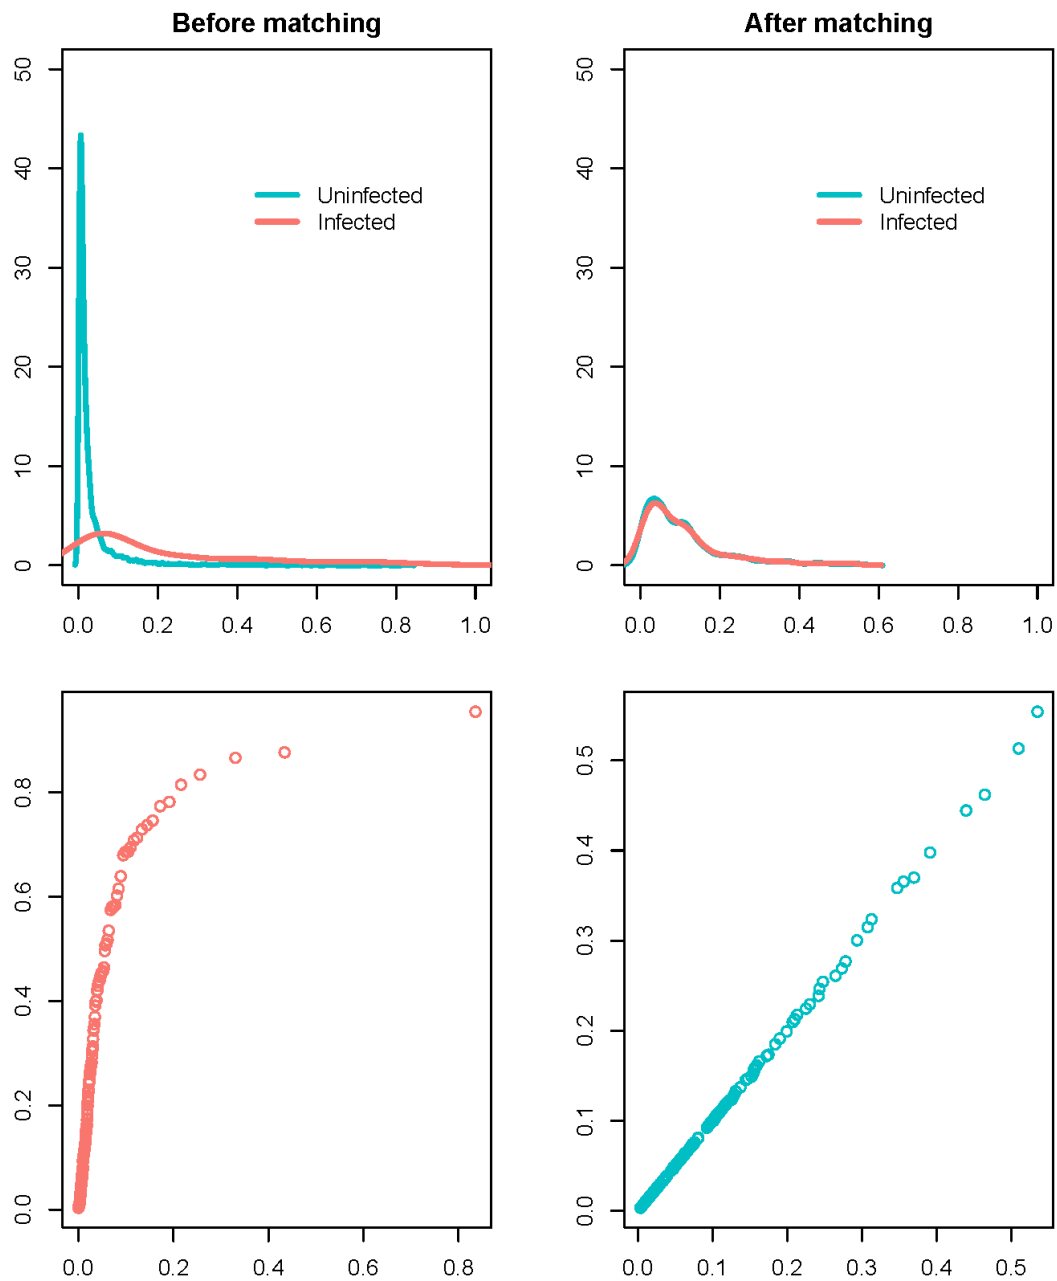

Supplement: bmjopen-2020-038551supp001.pdf [file bmjopen-2020-038551supp001.pdf]
