# Supplementary material for: Impact of infection in patients with non-ST elevation acute coronary syndrome undergoing percutaneous coronary intervention: insight from a multicentre observational cohort from China
Source: PubMed Central journal article supplement — BMJ Open. 2020 Sep 14;10(9):e038551. doi: 10.1136/bmjopen-2020-038551 (PMC7490952; doi:10.1136/bmjopen-2020-038551), 2020-09-14
Supplement: bmjopen-2020-038551.draft_revisions.pdf [file bmjopen-2020-038551.draft_revisions.pdf]

# BMJ Open

BMJ Open is committed to open peer review. As part of this commitment we make the peer review history of every article we publish publicly available.

When an article is published we post the peer reviewers' comments and the authors' responses online. We also post the versions of the paper that were used during peer review. These are the versions that the peer review comments apply to.

The versions of the paper that follow are the versions that were submitted during the peer review process. They are not the versions of record or the final published versions. They should not be cited or distributed as the published version of this manuscript.

BMJ Open is an open access journal and the full, final, typeset and author-corrected version of record of the manuscript is available on our site with no access controls, subscription charges or pay-per-view fees (<http://bmjopen.bmj.com>).

If you have any questions on BMJ Open's open peer review process please email [info.bmjopen@bmj.com](mailto:info.bmjopen@bmj.com)

# BMJ Open

## Impact of infection for non-ST-elevation acute coronary syndrome patients undergoing percutaneous coronary intervention: insight from a multicentre observational cohort from China

|                               |                                                                                                                                                                                                                                                                                                                                                                                                                                                                                                                                                                                                                                                                                                                                                                                                                                                                                                                                                                                                                                                                                                                                                                                                                                                                                                                                                                                                                                                                                                                                                                                                                                                                                                                                                                                                                                                                                                                                                                                                                                                                                                                                                                                                                                                                                                                            |
|-------------------------------|----------------------------------------------------------------------------------------------------------------------------------------------------------------------------------------------------------------------------------------------------------------------------------------------------------------------------------------------------------------------------------------------------------------------------------------------------------------------------------------------------------------------------------------------------------------------------------------------------------------------------------------------------------------------------------------------------------------------------------------------------------------------------------------------------------------------------------------------------------------------------------------------------------------------------------------------------------------------------------------------------------------------------------------------------------------------------------------------------------------------------------------------------------------------------------------------------------------------------------------------------------------------------------------------------------------------------------------------------------------------------------------------------------------------------------------------------------------------------------------------------------------------------------------------------------------------------------------------------------------------------------------------------------------------------------------------------------------------------------------------------------------------------------------------------------------------------------------------------------------------------------------------------------------------------------------------------------------------------------------------------------------------------------------------------------------------------------------------------------------------------------------------------------------------------------------------------------------------------------------------------------------------------------------------------------------------------|
| Journal:                      | <i>BMJ Open</i>                                                                                                                                                                                                                                                                                                                                                                                                                                                                                                                                                                                                                                                                                                                                                                                                                                                                                                                                                                                                                                                                                                                                                                                                                                                                                                                                                                                                                                                                                                                                                                                                                                                                                                                                                                                                                                                                                                                                                                                                                                                                                                                                                                                                                                                                                                            |
| Manuscript ID                 | bmjopen-2020-038551                                                                                                                                                                                                                                                                                                                                                                                                                                                                                                                                                                                                                                                                                                                                                                                                                                                                                                                                                                                                                                                                                                                                                                                                                                                                                                                                                                                                                                                                                                                                                                                                                                                                                                                                                                                                                                                                                                                                                                                                                                                                                                                                                                                                                                                                                                        |
| Article Type:                 | Original research                                                                                                                                                                                                                                                                                                                                                                                                                                                                                                                                                                                                                                                                                                                                                                                                                                                                                                                                                                                                                                                                                                                                                                                                                                                                                                                                                                                                                                                                                                                                                                                                                                                                                                                                                                                                                                                                                                                                                                                                                                                                                                                                                                                                                                                                                                          |
| Date Submitted by the Author: | 16-Mar-2020                                                                                                                                                                                                                                                                                                                                                                                                                                                                                                                                                                                                                                                                                                                                                                                                                                                                                                                                                                                                                                                                                                                                                                                                                                                                                                                                                                                                                                                                                                                                                                                                                                                                                                                                                                                                                                                                                                                                                                                                                                                                                                                                                                                                                                                                                                                |
| Complete List of Authors:     | <p>Chen, Peng-yuan; Guangdong General Hospital's Nanhai Hospital, the Second Hospital of Nanhai District Foshan City, Department of Cardiology<br/>Liu, Yuanhui; Guangdong Cardiovascular Institute, Guangdong Provincial Key Laboratory of Coronary Heart Disease Prevention, Guangdong Provincial People's Hospital, Guangdong Academy of Medical Sciences, Department of Cardiology, Beijing Anzhen Hospital, Capital Medical University</p> <p>Duan, Chongyang; School of Public Health, Southern Medical University, Guangzhou, Biostatistics</p> <p>Jiang, Lei; Guangdong Cardiovascular Institute, Guangdong Provincial Key Laboratory of Coronary Heart Disease Prevention, Guangdong Provincial People's Hospital, Guangdong Academy of Medical Sciences, Department of Cardiology, Beijing Anzhen Hospital, Capital Medical University</p> <p>Wei, Xuebiao; Guangdong Cardiovascular Institute, Guangdong Provincial Key Laboratory of Coronary Heart Disease Prevention, Guangdong Provincial People's Hospital, Guangdong Academy of Medical Sciences, Department of Cardiology, Beijing Anzhen Hospital, Capital Medical University</p> <p>Guo, Wei; Guangdong Cardiovascular Institute, Guangdong Provincial Key Laboratory of Coronary Heart Disease Prevention, Guangdong Provincial People's Hospital, Guangdong Academy of Medical Sciences, Department of Cardiology, Beijing Anzhen Hospital, Capital Medical University</p> <p>Chen, Jiyan; Guangdong Cardiovascular Institute, Guangdong Provincial Key Laboratory of Coronary Heart Disease Prevention, Guangdong Provincial People's Hospital, Guangdong Academy of Medical Sciences, Department of Cardiology, Beijing Anzhen Hospital, Capital Medical University</p> <p>Tan, Ning; Guangdong Cardiovascular Institute, Guangdong Provincial Key Laboratory of Coronary Heart Disease Prevention, Guangdong Provincial People's Hospital, Guangdong Academy of Medical Sciences, Department of Cardiology, Beijing Anzhen Hospital, Capital Medical University</p> <p>He, Pengcheng; Guangdong Cardiovascular Institute, Guangdong Provincial Key Laboratory of Coronary Heart Disease Prevention, Guangdong Provincial People's Hospital, Guangdong Academy of Medical Sciences, Department of Cardiology, Beijing Anzhen Hospital, Capital</p> |

1  
2  
3  
4  
5  
6  
7  
8  
9  
10  
11  
12  
13  
14  
15  
16  
17  
18  
19  
20  
21  
22  
23  
24  
25  
26  
27  
28  
29  
30  
31  
32  
33  
34  
35  
36  
37  
38  
39  
40  
41  
42  
43  
44  
45  
46  
47  
48  
49  
50  
51  
52  
53  
54  
55  
56  
57  
58  
59  
60

|           |                                                                                                                                                                                                     |
|-----------|-----------------------------------------------------------------------------------------------------------------------------------------------------------------------------------------------------|
|           | Medical University; Guangdong General Hospital's Nanhai Hospital, the Second Hospital of Nanhai District Foshan City, Department of Cardiology, Beijing Anzhen Hospital, Capital Medical University |
| Keywords: | Coronary heart disease < CARDIOLOGY, Coronary intervention < CARDIOLOGY, Cardiology < INTERNAL MEDICINE                                                                                             |
|           |                                                                                                                                                                                                     |

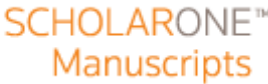

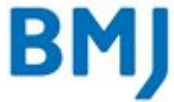

I, the Submitting Author has the right to grant and does grant on behalf of all authors of the Work (as defined in the below author licence), an exclusive licence and/or a non-exclusive licence for contributions from authors who are: i) UK Crown employees; ii) where BMJ has agreed a CC-BY licence shall apply, and/or iii) in accordance with the terms applicable for US Federal Government officers or employees acting as part of their official duties; on a worldwide, perpetual, irrevocable, royalty-free basis to BMJ Publishing Group Ltd ("BMJ") its licensees and where the relevant Journal is co-owned by BMJ to the co-owners of the Journal, to publish the Work in this journal and any other BMJ products and to exploit all rights, as set out in our [licence](#).

The Submitting Author accepts and understands that any supply made under these terms is made by BMJ to the Submitting Author unless you are acting as an employee on behalf of your employer or a postgraduate student of an affiliated institution which is paying any applicable article publishing charge ("APC") for Open Access articles. Where the Submitting Author wishes to make the Work available on an Open Access basis (and intends to pay the relevant APC), the terms of reuse of such Open Access shall be governed by a Creative Commons licence – details of these licences and which [Creative Commons](#) licence will apply to this Work are set out in our licence referred to above.

Other than as permitted in any relevant BMJ Author's Self Archiving Policies, I confirm this Work has not been accepted for publication elsewhere, is not being considered for publication elsewhere and does not duplicate material already published. I confirm all authors consent to publication of this Work and authorise the granting of this licence.

**Original article****Impact of infection for non-ST-elevation acute coronary syndrome patients undergoing percutaneous coronary intervention: insight from a multicentre observational cohort from China**

Pengyuan Chen<sup>1\*</sup>, MD; Yuanhui Liu<sup>2\*</sup>, MD, PhD; ChongYang Duan<sup>3\*</sup>, MD; Lei Jiang<sup>2</sup>, MD, PhD; XueBiao Wei<sup>2</sup>, MD; Wei Guo<sup>2</sup>, MD, PhD; JiYan Chen<sup>2</sup>, MD, PhD; Ning Tan<sup>2</sup>, MD, PhD; PengCheng He<sup>1,2</sup>, MD, PhD;

**Running Title:** Infection of NSTEMI-ACS and PCI

1. Department of Cardiology, Guangdong General Hospital's Nanhai Hospital, the Second Hospital of Nanhai District Foshan City, Foshan 528000, China.
2. Department of Cardiology, Guangdong Cardiovascular Institute, Guangdong Provincial Key Laboratory of Coronary Heart Disease Prevention, Guangdong Provincial People's Hospital, Guangdong Academy of Medical Sciences, Guangzhou 510100, China.
3. Department of Biostatistics, School of Public Health, Southern Medical University, Guangzhou, 510515, China

\*These authors were considered equally to the work.

**Address for corresponding author:** PengCheng He; Department of Cardiology, Guangdong Cardiovascular Institute, Guangdong Provincial Key Laboratory of Coronary Heart Disease Prevention, Guangdong Provincial People's Hospital, Guangdong Academy of Medical Sciences, Guangzhou 510100, China.

Guangdong General Hospital's Nanhai Hospital, the Second Hospital of Nanhai

1  
2  
3  
4 District Foshan City, Foshan 528000, China.  
5

6 Tel: +86-20-83819161 Fax: +86-20-83824369; [gdhpc100@126.com](mailto:gdhpc100@126.com)  
7  
8

9 **Words count:** 3907 words  
10  
11  
12  
13  
14  
15  
16  
17  
18  
19  
20  
21  
22  
23  
24  
25  
26  
27  
28  
29  
30  
31  
32  
33  
34  
35  
36  
37  
38  
39  
40  
41  
42  
43  
44  
45  
46  
47  
48  
49  
50  
51  
52  
53  
54  
55  
56  
57  
58  
59  
60

For peer review only

## Abstract

**Objectives:** we aimed to interpret the association between in-hospital infection and the prognosis among non-ST-elevation acute coronary syndrome (NSTEMI-ACS) patients received percutaneous coronary intervention (PCI).

**Design:** This observational cohort originated from the database for NSTEMI-ACS underwent percutaneous coronary intervention from January 1, 2010, to December 31, 2014.

**Setting:** five centres from south China

**Participants:** This multicentre observational cohort study consecutively included 8197 NSTEMI-ACS patients who received PCI. Only patients with adequate information to diagnose or rule out infection were included. Patients were excluded if they were diagnosed with a malignant tumor, pregnant or cardiogenic shock at index date. Patients were grouped by whether they had in-hospital infection or not.

**Primary and secondary outcome measures:** the primary outcome was all-cause death and major bleeding during hospitalization. The secondary outcomes included all-cause death and major bleeding during follow-up and in-hospital myocardial infarction.

**Results:** Of the 5215 patients, 206 (3.95%) occurred infection. Patients with infection had a higher rate of in-hospital all-cause death and major bleeding (4.4% vs. 0.2%, 16.5% vs. 1.2% respectively,  $P < .001$ ). After adjusting for confounders, infection remained independently associated with the in-hospital and long-term all-cause death (OR, 13.19, 95% CI: 4.59-37.87; HR, 2.03, 95% CI: 1.52-2.71;  $P < .001$ ) and major bleeding (OR, 10.24; 95% CI: 6.17-16.98; HR, 5.31, 95% CI: 3.49-8.08;  $P < .001$ ). Subgroup analysis

1  
2  
3  
4 confirmed these results.  
5

6 **Conclusions:** the incidence of infection is low in hospitalization, but it is associated  
7  
8  
9 with worse in-hospital and long-term outcomes.  
10

11 **Key Words:** Non-ST-elevation acute coronary syndrome; Percutaneous coronary  
12  
13  
14 intervention; Infection; Outcomes.  
15  
16

17  
18  
19  
20  
21  
22  
23  
24  
25  
26  
27  
28  
29  
30  
31  
32  
33  
34  
35  
36  
37  
38  
39  
40  
41  
42  
43  
44  
45  
46  
47  
48  
49  
50  
51  
52  
53  
54  
55  
56  
57  
58  
59  
60

For peer review only



### Strengths and limitations of this study

- We widely included NSTEMI-ACS patients who received PCI treatment from China.
- The characteristics of infection was detailed reported which included the time and infection type.
- Validation was done in different subgroups and variables which is our best effort based on the database.
- The potential bias may be neglected because of the study design.
- The etiology test of the infection is absent which limited the advanced exploration of the mechanism.

## Introduction

The incidence of non-ST-elevation acute coronary syndrome (NSTE-ACS) is increasing, and approximately 70% of all ACS patients are NSTE<sup>1</sup>. These patients typically have more comorbidities than patients with ST-segment elevation myocardial infarction (STEMI) and are associated with both worse short- and long-term outcomes<sup>1, 2</sup>. Identification of patients at risk for worse outcomes could result in targeted intervention, help direct care, reduce the incidence of subsequent events, and thus optimize resource utilization.

Infection can activate platelets and the coagulation system, contributing to the prothrombotic environment<sup>3, 4</sup>. Moreover, infection is an uncommon but important comorbidity in patients undergoing percutaneous coronary intervention (PCI)<sup>5-7</sup>. Although the reported incidence is less than 4%, infection has been proven to be associated with an increased risk of cardiovascular events among patients with STEMI<sup>8, 9</sup>. However, information about infection in patients with NSTE-ACS remains scanty. Only one study of 174 octogenarian patients with ACS evaluated the impact of infection on clinical outcomes<sup>10</sup>. Thus, we aimed to assess the incidence and association of infection on short- and long-term clinical outcomes in NSTE-ACS patients undergoing PCI.

## Methods

### Study design and patients

This observational cohort study consisted of consecutive NSTE-ACS patients undergoing PCI from Jan 2010 to Dec 2014 at five hospitals in China. Only patients with adequate information to diagnose or rule out infection were included. Patients were

1  
2  
3 excluded if they were diagnosed with a malignant tumor before the index date, pregnant  
4 or presenting with cardiogenic shock. The method to search and identify appropriate  
5 NSTEMI-ACS patients has been outlined previously<sup>11</sup>. The study protocol was approved  
6 by the central ethics committee of the Guangdong Provincial People's Hospital, with a  
7 waiver of informed consent. The study was conducted in accordance with the  
8 Declaration of Helsinki.  
9

### 17 **Data collection and procedures**

10  
11  
12  
13  
14  
15  
16  
17  
18  
19  
20  
21  
22  
23  
24  
25  
26  
27  
28  
29  
30  
31  
32  
33  
34  
35  
36  
37  
38  
39  
40  
41  
42  
43  
44  
45  
46  
47  
48  
49  
50  
51  
52  
53  
54  
55  
56  
57  
58  
59  
60  
Data on demographics, patient history, laboratory tests, examinations, and medication  
history were collected by investigators in the first interview after admission. The  
medicines and PCI procedures were applied according to international guidelines and  
clinical evidence<sup>12</sup>.

Infection during the index hospitalization was diagnosed according to the presence  
of any symptoms, signs and/or laboratory indicating infection. Once confirmed by the  
infection control doctors service, appropriate antibiotics were prescribed<sup>8</sup>. Infection  
was classified as pulmonary, urinary tract infection (UTI) or others (including non-  
pulmonary/ non-urinary sepsis and cellulitis), based on the clinical records during  
hospitalization. Community-acquired pulmonary infection was defined by a diagnosis  
of infection within the first 72 hours of hospital admission, and hospital-acquired  
pulmonary infection was defined as those occurring after the first 72 hours and were  
diagnosed in accordance with the criteria established by the Centers for Disease Control  
and Prevention<sup>13</sup>.

### 57 **Clinical outcomes and follow up**

The primary outcome was in-hospital all-cause death and in-hospital major bleeding as

1  
2  
3  
4 defined by the Bleeding Academic Research Consortium definition (grades 3-5)<sup>14</sup>.

5  
6 Secondary outcomes were: (1) major adverse clinical events (MACE), consisting of all-  
7  
8 cause death, myocardial infarction, or major bleeding during hospitalization; and (2)  
9  
10 all-cause death or major bleeding during follow-up.  
11  
12

13  
14 All patients were followed-up by trained nurses via telephone interview or clinic  
15  
16 visits from Nov 2015 to Dec 2016. Relevant information was also collected from the  
17  
18 residence registration system and from the clinical records of the patients who were  
19  
20 readmitted. The details of clinical events and follow-up has been previously described<sup>11</sup>.  
21  
22

### 23 24 **Statistical analysis**

25  
26 All patients were divided into groups with or without infections. Continuous variables  
27  
28 with a normal distribution are presented as the mean  $\pm$  SD, and those with an  
29  
30 asymmetric distribution are presented as the median and interquartile range (Q25-Q75).  
31  
32 Student's t test or Wilcoxon rank-sum test were used to compare the continuous  
33  
34 variables. Categorical variables are presented as frequencies and were compared by the  
35  
36 Fisher exact test or chi-square test. Univariate and multivariable analyses were  
37  
38 performed to evaluate the relationship between infection and clinical outcomes.  
39  
40 Variables that were significant in the univariate analysis or clinically important were  
41  
42 included in the multivariable models. Considering the low incidence of adverse  
43  
44 outcomes but potential high incidence of confounders, each multivariable analysis two  
45  
46 models were developed. The first model (model 1) included infection, age, anemia, type  
47  
48 of disease (unstable angina and non-ST-elevation acute myocardial infarction), gender,  
49  
50 current smokers, heart failure, and estimate glomerular filtration rate (eGFR). The  
51  
52  
53  
54  
55  
56  
57  
58  
59  
60

1  
2  
3  
4 second model (model 2) included radial access, cardiac biomarker positive, time to  
5  
6 procedure, treated multi-vessel, diabetes mellitus, hypertension, prior myocardial  
7  
8 infarction, and prior stroke. We performed subgroup analyses by older age, gender,  
9  
10 current smokers, diabetes mellitus, types of disease, heart failure, anemia and chronic  
11  
12 kidney disease. Analysis based on different types of infections was reported. We also  
13  
14 introduced the GRACE (Global Registry of Acute Coronary Events)<sup>15</sup> and CRUSADE  
15  
16 (Can Rapid Risk Stratification of Unstable Angina Patients Suppress Adverse  
17  
18 Outcomes With Early Implementation of the ACC/AHA Guidelines) score<sup>16</sup> and  
19  
20 compared the infection outcomes among different GRACE or CRUSADE risk groups  
21  
22 (low, medium, or high risk). All data analyses were performed with SAS (version 9.4,  
23  
24 SAS Institute, 210 Cary, North Carolina, USA). A 2-sided P<0.05 was considered  
25  
26 significant.

### 35 **Patient and public involvement**

36  
37 There was no patient or public involvement in any step of this study.

### 40 **Results**

#### 43 **Baseline characteristic**

44  
45 From January 1, 2010, to December 31, 2014, a total of 8197 consecutive NSTEMI-ACS  
46  
47 patients underwent PCI at the 5 hospitals in China. Of the 5215 patients who met the  
48  
49 final criteria, 206 (3.95%) received a diagnosis of infection, and 183 (89%) of them  
50  
51 occurred within one week after hospital admission (**Figure S1**). **Table 1** shows the  
52  
53 baseline characteristics of patients with and without infection. The patients with  
54  
55 infection were older and a low body weight. These patients were more likely to have a  
56  
57  
58  
59  
60

1  
2  
3  
4 history of myocardial infarction, stroke, hypertension and diabetes, and more often had  
5  
6 a diagnosis of heart failure, anemia and the use of intra-aortic balloon pump and dual  
7  
8 antiplatelet therapy. Patients with infection had lower left ventricular ejection fraction,  
9  
10 eGFR but higher GRACE risk scores compared with those without infection. However,  
11  
12 the CRUSADE risk score was similar between the two groups.  
13  
14  
15

### 16 **In-hospital clinical outcomes**

17  
18 Patients with infection had a higher rate of in-hospital all-cause death (4.4% vs. 0.2%),  
19  
20 major bleeding (16.5% vs. 1.2%), and MACE (21.4% vs. 1.7%) compared with patients  
21  
22 without infection (all  $P < .001$ ) (**Table 2**). However, the rate of in-hospital myocardial  
23  
24 infarction was similar between the two groups ( $P = 0.726$ ).  
25  
26  
27  
28  
29

30 Univariable analyses showed that infection was a predictor of in-hospital all cause  
31  
32 death (odds ratios [OR] 22.96; 95% confidence interval [CI], 9.23-57.14,  $P < .001$ ),  
33  
34 major bleeding (OR, 16.30; 95% CI, 10.42-25.50;  $P < .001$ ), and MACE (OR, 14.48;  
35  
36 95%CI, 9.62-21.78;  $P < .001$ ). After adjusting for other confounding variables,  
37  
38 multivariable logistic regression showed that infection was significantly and  
39  
40 independently related to the risk of the above outcomes (**Figure 1**).  
41  
42  
43  
44

### 45 **Long-term clinical outcomes**

46  
47 At a median follow-up of 3.2 years, Kaplan-Meier analysis revealed that patients with  
48  
49 in-hospital infection had a higher risk of long-term death, major bleeding, and death or  
50  
51 major bleeding compared with those without in-hospital infection ( $P < .001$ ) (**Table 2**,  
52  
53 **Figure 2 and Figure S2**). Multivariable cox analyses demonstrated that infection was  
54  
55 independently associated with long-term adverse outcomes even after adjusting for  
56  
57  
58  
59  
60

1  
2  
3  
4 other potential risk factors (all cause death: hazard ratio [HR], 2.03; 95% CI, 1.52-2.71;  
5  
6 P<.001; major bleeding: HR, 5.31; 95% CI, 3.49-8.08; P<.001; death or major bleeding:  
7  
8 HR, 2.47; 95% CI, 1.92-3.19; P<.001). The similar result was reported in the other  
9  
10 adjusted model (**Figure 1**).

### 11 12 13 14 **Subgroup analyses**

15  
16  
17 Subgroup analyses similarly revealed that infection was independently related to the in-  
18  
19 hospital events (all-cause death, major bleeding, or MACE) according to different  
20  
21 clinical status. The unadjusted and adjusted ORs for infection are presented in **Figure**  
22  
23 **S3, Figure S4, and Figure S5**. Analysis according to the infection subtypes indicated  
24  
25 that pulmonary infection other than UTI was independently associated with poor in-  
26  
27 hospital and follow up clinical outcomes. However, the UTI was independently  
28  
29 associated with all-cause death (**Table S1**). Furthermore, the relationship between  
30  
31 infection and major bleeding, and MACE was consistent among patients with different  
32  
33 GRACE or CRUSADE scores (low, medium, or high risk) (**Figure S6, S7, S8 and S9**).

### 34 35 36 37 38 39 40 **Discussion**

41  
42  
43 This study demonstrates that infection was uncommon in a contemporary cohort  
44  
45 of NSTEMI-ACS patients who underwent PCI. But still the in-hospital infection among  
46  
47 NSTEMI-ACS patients received PCI is significant associated with higher risk of in-  
48  
49 hospital and long-term clinical prognoses, such as all-cause death, major bleeding as  
50  
51 well as the MACE.

52  
53  
54  
55  
56 The prevalence of infection in our study are similar to those results for the STEMI  
57  
58 population. Data from 5,745 STEMI patients enrolled in the APEX-AMI trial  
59  
60

1  
2  
3  
4 demonstrated that the prevalence of serious infection was 2.4%, and that infection was  
5  
6 associated with higher 90-day mortality (29%)<sup>9</sup>. Also, another study of 1,486 STEMI  
7  
8 patients reported the prevalence of serious infection at 3.9% and the 30-day mortality  
9  
10 was up to 53% in these patients<sup>8</sup>. The conclusions for these 2 studies paralleled our  
11  
12 conclusion: infection is uncommon but associated with worse clinical outcomes. A  
13  
14 recent retrospective cohort analyses of 174 octogenarians with ACS, for whom the  
15  
16 patients with infection had a higher in-hospital, 30-day and long-term mortality than  
17  
18 patients without infection<sup>10</sup>. However, that study was confined to patients older than 85  
19  
20 years who were admitted to the coronary care unit, the different ACS types were never  
21  
22 specified, and the relatively liberal use of bare metal stents does not conform with the  
23  
24 contemporary more liberal use of drug eluting stents<sup>17, 18</sup>.

25  
26  
27 To our knowledge, this study is the first to demonstrate the role of infection on  
28  
29 patients with NSTEMI-ACS. Although the prevalence of infections was similar to the  
30  
31 previous studies of STEMI<sup>8, 9</sup>, the 30 and 90-day death rates were lower than those  
32  
33 studies. These low rates might be the result of patient characteristics of our study with  
34  
35 less patients requiring intra-aortic balloon pump support, mechanical ventilation and  
36  
37 transfusion. However, our conclusions paralleled: patients with infections were  
38  
39 associated with worse outcomes. This association remained consistent after the  
40  
41 adjustment of other important potential risk factors for outcomes such as radial access,  
42  
43 cardiac biomarker positive, time to revascularization, and treated multi-vessel.  
44  
45  
46  
47  
48  
49  
50  
51  
52  
53  
54

55  
56 Although infections had a negative impact on patients with NSTEMI-ACS, the  
57  
58 underlying pathophysiologic mechanism remains unclear. Corrales-Medina et al<sup>19</sup>  
59  
60



1  
2  
3  
4 suggested that infection increased the mortality of patients who underwent elective PCI  
5  
6 due to change in the plaques triggered by acute inflammatory reactions. Indeed,  
7  
8 infection has been implicated as a factor contributing to initiation, progression and  
9  
10 rupture of an atherosclerotic plaque<sup>20</sup>. Infectious vectors have been reported to induce  
11  
12 the expression of adhesion molecules such as heat shock protein 60 and monocyte  
13  
14 chemoattractant protein-1 on endothelial cells, which can activate the endothelium and  
15  
16 the formation of a lipid core<sup>21-24</sup>. Additionally, the SIXTUS study group<sup>25</sup> demonstrated  
17  
18 that platelet activation and TxB<sub>2</sub> overproduction are related to infections via Toll-like  
19  
20 receptor 4. Moreover, MODICA et al.<sup>26</sup> reported that aspirin non-responsiveness was  
21  
22 often observed in patients with pneumonia. Also, increased coagulation activity has  
23  
24 been observed in pneumonia<sup>3</sup>. Therefore, infection can activate platelets and the  
25  
26 coagulation system, which plays a critical role in deteriorating outcomes in patients  
27  
28 with ACS. In contrast to previous STEMI reports<sup>8, 9</sup>, we did not find a significant  
29  
30 association of infection with myocardial infarction due to the low incidence of  
31  
32 myocardial infarction in our study. However, our results were similar to previous  
33  
34 studies that reported major bleeding more frequent in patients with infection. Although  
35  
36 the PLATelet inhibition and patient Outcomes (PLATO) trial demonstrated that  
37  
38 ticagrelor, a more potent and consistent platelet P2Y<sub>12</sub> inhibitor, was associated with  
39  
40 significantly fewer pulmonary infections and death related to infection than clopidogrel,  
41  
42 the incidence of bleeding in patients with infection in that study was not reported<sup>4</sup>.  
43  
44 Because of dysfunction of platelets and the coagulation system, patients with infection  
45  
46 might be at higher risk of ischemia and bleeding. Therefore, more attention should be  
47  
48  
49  
50  
51  
52  
53  
54  
55  
56  
57  
58  
59  
60

1  
2  
3  
4 paid to patients with infection when antithrombotic therapy was determined. Finally,  
5  
6 infection can also result in worse outcomes for NSTEMI-ACS patients through increasing  
7  
8 catecholamines and potentially adverse hemodynamic effects, such as coronary  
9  
10 vasoconstriction and increased myocardial metabolic demands<sup>27</sup>.  
11  
12

13  
14 Although UTI was associated to some degree with in-hospital all-cause death, it  
15  
16 was not associated with other worse outcomes. One reason why pulmonary infection is  
17  
18 related to these worse clinical outcomes, while UTI is not, could be the lower  
19  
20 prevalence of UTI comparing to pulmonary infection (0.3% vs. 2.6%). The prevalence  
21  
22 of UTI was lower in our study compared with STEMI patients (0.3% vs. 7%)<sup>8</sup>.  
23  
24 Therefore, when the population sample size was expanded, UTI would be similar to the  
25  
26 pulmonary infection relating to the worse clinical outcomes.  
27  
28  
29  
30  
31

### 32 **Limitations**

33  
34 The study had several limitations. First, as a retrospective study a causal relationship  
35  
36 between the infection and outcomes could not be determined. Second, despite  
37  
38 adjustment for important confounders, we could not completely eliminate all the  
39  
40 potential bias including selection bias. Third, although the infections were not centrally  
41  
42 adjudicated, the infection was confirmed by the infection control services who were  
43  
44 authorized to approve the use of antibiotic. In addition, all other adverse clinical events  
45  
46 were evaluated by an independent clinical events committee that was masked to the  
47  
48 infection details.  
49  
50  
51  
52  
53

### 54 **Conclusions**

55  
56 Infection is an uncommon complication in patients with NSTEMI-ACS undergoing PCI  
57  
58  
59  
60

1  
2  
3  
4 but is nonetheless independently associated with worse in-hospital and long-term  
5  
6 outcomes. Future studies are indicated to identify NSTEMI-ACS patients at risk for  
7  
8 infection which could then result in targeted intervention, help direct care, reduce the  
9  
10 incidence of subsequent adverse events, and thus optimize resource utilization.  
11  
12

### 13 **Acknowledgements**

14  
15 The authors appreciate the efforts of revising the manuscript, Scott J. Denardo, MD,  
16  
17 Reid Heart Center/First Health of Carolinas Cardiac and Vascular Institute, Pinehurst,  
18  
19 NC, USA. We thank the patients who participated in this trial and their relatives; the  
20  
21 clinical and research teams; and the nursing teams in our hospital for their work on the  
22  
23 study. Department of Cardiology, Guangdong Cardiovascular Institute, Guangdong  
24  
25 Provincial Key Laboratory of Coronary Heart Disease Prevention, Guangdong  
26  
27 Provincial People's Hospital, Guangdong Academic of Medical Sciences, Guangzhou  
28  
29 510100, China.(Danqing Yu; Jianfang Luo; Zhonghan Ni;Peixia Huo; Qiong Ren;  
30  
31 Yanyan Zhong;Liyun Wang; Jianxia He; Ruijuan Xiao; Yuanling Li; Xinrong Liu; Hui  
32  
33 Wang; Mingyu Chen; Haiyan Xue;Xuxi Yang; Suqin Xie;). Department of Cardiology,  
34  
35 The Second People's Hospital of Nanhai District, Guangdong General Hospital's  
36  
37 Nanhai Hospital, Foshan, 528251, China (Wenfei He).  
38  
39  
40  
41  
42  
43  
44  
45  
46  
47

### 48 **Funding**

49  
50 This study was supported by a grant from the National Science Foundation for Young  
51  
52 Scientists of China (Grant No. 81800325) and Science and Technology Planning  
53  
54 Project of Guangzhou City (201906010089, 201707010002), and China Youth  
55  
56 Research Funding (2017-CCA-VG-018 and 2017-CCA-VG-02). The funders had no  
57  
58  
59  
60

1  
2  
3  
4 role in the study design, data collection and analysis, the decision to publish, or the  
5  
6 preparation of the manuscript. The work was not funded by any industry sponsors. All  
7  
8 authors agreed to submit the manuscript for publication.  
9  
10

### 11 **Authors' contributions**

12  
13  
14 P-C He designed and supervised the study; P-Y Chen, Y-H Liu, L Jiang, X-B Wei and  
15  
16 W Guo performed the study, and C-Y Duan analyzed the data; Y-H Liu and other  
17  
18 authors provided the samples and demographics from patients and controls; Y-H Liu  
19  
20 and P-Y Chen wrote the manuscript; N Tan, J-Y Chen and P-C He revised the  
21  
22 manuscript for important intellectual content.  
23  
24  
25

### 26 **Conflict of Interest**

27  
28  
29  
30 The authors declared no potential conflicts of interest with respect to the research,  
31  
32 authorship, and/or publication of this article.  
33  
34

### 35 **Ethics approval and consent to participate**

36  
37  
38 The study protocol was approved by the central ethics committee of the Guangdong  
39  
40 Provincial People's Hospital (NO. GDREC2016210H(R1)). Patients were included  
41  
42 with a waiver of informed consent.  
43  
44

45  
46 This article does not contain any studies with animals performed by any of the authors.  
47

### 48 **Data availability statement**

49  
50  
51 Data source for this study is a retrospective public health database with data which all  
52  
53 hospitalisations that were already anonymised. Data were confidentially stored once the  
54  
55 original study published according to the original protocol, but data are available upon  
56  
57 reasonable request.  
58  
59  
60

**Open access**

This is an open access article distributed in accordance with the Creative Commons Attribution Non Commercial (CC BY-NC 4.0) license, which permits others to distribute, remix, adapt, build upon this work non-commercially, and license their derivative works on different terms, provided the original work is properly cited, appropriate credit is given, any changes made indicated, and the use is non-commercial.

For peer review only

---

## References

1. Mozaffarian D, Benjamin EJ, Go AS, Arnett DK, Blaha MJ, Cushman M, et al. Heart Disease and Stroke Statistics-2016 Update. *Circulation*. 2016;133(4):e38-e360.
2. Amsterdam EA, Wenger NK, Brindis RG, Casey DJ, Ganiats TG, Holmes DJ, et al. 2014 AHA/ACC guideline for the management of patients with non-ST-elevation acute coronary syndromes: a report of the American College of Cardiology/American Heart Association Task Force on Practice Guidelines. *Circulation*. 2014;130(25):e344-e426.
3. Milbrandt EB, Reade MC, Lee M, Shook SL, Angus DC, Kong L, et al. Prevalence and significance of coagulation abnormalities in community-acquired pneumonia. *Mol Med*. 2009;15(11-12):438-445.
4. Varenhorst C, Alstrom U, Braun OO, Storey RF, Mahaffey KW, Bertilsson M, et al. Causes of mortality with ticagrelor compared with clopidogrel in acute coronary syndromes. *Heart*. 2014;100(22):1762-1769.
5. Rizos M, Falagas ME, Tsiodras S, Betsou A, Foukas P, Michalopoulos A. Usual interstitial pneumonia associated with cytomegalovirus infection after percutaneous transluminal coronary angioplasty. *Eur J Clin Microbiol*. 2004;23(11):848-850.
6. Alfonso F. Fatal infection after rapamycin eluting coronary stent implantation. *Heart*. 2005;91(6):e51.
7. Ziakas A, Konstantinou V, Giannoglou G, Gemitzis K, Louridas G. Enoxaparin-induced psoas hematoma complicated by *Staphylococcus aureus* infection after cardiac catheterization. *Thromb Res*. 2006;118(4):535-537.
8. Piccaro DOP, Gonzales V, Lopes RD, Schmidt MM, Garofallo S, Santos RP, et al.

1  
2  
3  
4 Serious infections among unselected patients with ST-elevation myocardial infarction  
5 treated with contemporary primary percutaneous coronary intervention. *Am Heart J.*  
6  
7 2016;181:52-59.  
8

9  
10  
11 **9.**Truffa AA, Granger CB, White KR, Newby LK, Mehta RH, Hochman JS, et al.  
12 Serious infection after acute myocardial infarction: incidence, clinical features, and  
13  
14 outcomes. *JACC Cardiovasc Interv.* 2012;5(7):769-776.  
15  
16

17  
18  
19 **10.**Keskin K, Çetinkal G, Sığırcı S, Yıldız SS, Çetin Ş, Gürdal A, et al. The impact of  
20 infection on mortality in octogenarians who were admitted due to acute coronary  
21  
22 syndrome. *Arch Gerontol Geriat.* 2018;76:48-53.  
23  
24

25  
26  
27 **11.**Chen J, He P, Liu Y, Wei X, Jiang L, Guo W, et al. Association of Parenteral  
28 Anticoagulation Therapy With Outcomes in Chinese Patients Undergoing Percutaneous  
29  
30 Coronary Intervention for Non–ST-Segment Elevation Acute Coronary Syndrome.  
31  
32 *JAMA Intern Med.* 2019;179(2):186.  
33  
34

35  
36  
37 **12.**Roffi M, Patrono C, Collet J, Mueller C, Valgimigli M, Andreotti F, et al. 2015 ESC  
38 Guidelines for the management of acute coronary syndromes in patients presenting  
39  
40 without persistent ST-segment elevation. *Eur Heart J.* 2016;37(3):267-315.  
41  
42

43  
44  
45 **13.** CDC-Center for Disease Control and Prevention. Identifying health care associated  
46  
47 infections (HAI) for NHSN surveillance. Vol 2015:1-14.  
48

49  
50  
51 **14.**Ndrepepa G, Schuster T, Hadamitzky M, Byrne RA, Mehilli J, Neumann FJ, et al.  
52  
53 Validation of the Bleeding Academic Research Consortium definition of bleeding in  
54  
55 patients with coronary artery disease undergoing percutaneous coronary intervention.  
56  
57 *Circulation.* 2012;125(11):1424-1431.  
58  
59

- 
- 1  
2  
3  
4 **15.**Granger CB, Goldberg RJ, Dabbous O, Pieper KS, Eagle KA, Cannon CP, et al.  
5  
6 Predictors of hospital mortality in the global registry of acute coronary events. *Arch*  
7  
8 *Intern Med.* 2003;163 (19):2345-2353.  
9  
10  
11 **16.**Subherwal S, Bach RG, Chen AY, Gage BF, Rao SV, Newby LK, et al. Baseline  
12  
13 risk of major bleeding in non-ST-segment-elevation myocardial infarction: the  
14  
15 CRUSADE (Can Rapid risk stratification of Unstable angina patients Suppress  
16  
17 ADverse outcomes with Early implementation of the ACC/AHA Guidelines) Bleeding  
18  
19 Score. *Circulation.* 2009;119(14):1873-1882.  
20  
21  
22 **17.**Palmerini T, Genereux P, Caixeta A, Cristea E, Lansky A, Mehran R, et al.  
23  
24 Prognostic value of the SYNTAX score in patients with acute coronary syndromes  
25  
26 undergoing percutaneous coronary intervention: analysis from the ACUITY (Acute  
27  
28 Catheterization and Urgent Intervention Triage StrategY) trial. *J Am Coll Cardiol.*  
29  
30 2011;57(24):2389-2397.  
31  
32  
33 **18.**Sabate M, Brugaletta S, Cequier A, Iniguez A, Serra A, Jimenez-Quevedo P, et al.  
34  
35 Clinical outcomes in patients with ST-segment elevation myocardial infarction treated  
36  
37 with everolimus-eluting stents versus bare-metal stents (EXAMINATION): 5-year  
38  
39 results of a randomised trial. *Lancet.* 2016;387(10016):357-366.  
40  
41  
42 **19.**Corrales-Medina VF, Musher DM, Shachkina S, Chirinos JA. Acute pneumonia and  
43  
44 the cardiovascular system. *Lancet.* 2013;381(9865):496-505.  
45  
46  
47 **20.**Pothineni NVK, Subramany S, Kuriakose K, Shirazi LF, Romeo F, Shah PK, et al.  
48  
49 Infections, atherosclerosis, and coronary heart disease. *Eur Heart J.* 2017;38(43): 3195-  
50  
51 3201.  
52  
53  
54  
55  
56  
57  
58  
59  
60



1  
2  
3  
4 **21.**Hsu YC, Lin JT, Ho HJ, Kao YH, Huang YT, Hsiao NW, et al. Antiviral treatment  
5  
6 for hepatitis C virus infection is associated with improved renal and cardiovascular  
7  
8 outcomes in diabetic patients. *Hepatology*. 2014;59(4):1293-1302.

9  
10  
11 **22.**Huang CY, Shih CM, Tsao NW, Lin YW, Shih CC, Chiang KH, et al. The GroEL  
12  
13 protein of *Porphyromonas gingivalis* regulates atherogenic phenomena in endothelial  
14  
15 cells mediated by upregulating toll-like receptor 4 expression. *Am J Transl Res*.  
16  
17 2016;8(2):384-404.

18  
19  
20 **23.**Lei L, Li H, Yan F, Li Y, Xiao Y. *Porphyromonas gingivalis* lipopolysaccharide  
21  
22 alters atherosclerotic-related gene expression in oxidized low-density-lipoprotein-  
23  
24 induced macrophages and foam cells. *J Periodontal Res*. 2011;46(4):427-437.

25  
26  
27 **24.**Park IW, Wang JF, Groopman JE. HIV-1 Tat promotes monocyte chemoattractant  
28  
29 protein-1 secretion followed by transmigration of monocytes. *Blood*. 2001;97(2):352-  
30  
31 358.

32  
33  
34 **25.**Cangemi R, Casciaro M, Rossi E, Calvieri C, Bucci T, Calabrese CM, et al. Platelet  
35  
36 activation is associated with myocardial infarction in patients with pneumonia. *J Am*  
37  
38 *Coll Cardiol*. 2014;64(18):1917-1925.

39  
40  
41 **26.**Modica A, Karlsson F, Mooe T, Fakulteten M, Medicin IFRF, Universitet U, et al..  
42  
43 Platelet aggregation and aspirin non-responsiveness increase when an acute coronary  
44  
45 syndrome is complicated by an infection. *J Thromb Haemost*.2007; 5(3):507-511.

46  
47  
48 **27.** Corrales-Medina VF, Musher DM, Wells GA, Chirinos JA, Chen L, Fine MJ.  
49  
50 Cardiac complications in patients with community-acquired pneumonia: incidence,  
51  
52 timing, risk factors, and association with short-term mortality. *Circulation*. 2012;125  
53  
54  
55  
56  
57  
58  
59  
60

---

(6):773-781.

For peer review only

---

## Table legends

**Table 1.** The baseline characteristics at index hospitalization

**Table 2.** In-hospital and long-term clinical outcomes

**Table S1.** Univariate and multivariable logistic for clinical outcomes by stratifying infection subtype.

## Figure legends

**Figure 1.** Univariate and multivariable logistic or Cox analysis for clinical outcomes

**Figure 2.** Kaplan-Meier estimated event rates of all cause death (A) and major bleeding (B)

**Figure S1.** Time from hospital admission to the diagnosis of infection among all patients.

**Figure S2.** Kaplan-Meier estimated event rates of all cause death or major bleeding

**Figure S3.** Subgroup analysis of in-hospital all cause death

**Figure S4.** Subgroup analysis of in-hospital major bleeding

**Figure S5.** Subgroup analysis of in-hospital major adverse clinical events

**Figure S6.** Subgroup analysis of in-hospital major bleeding based on different risk of GRACE and CRUSADE adjusted by the model 1

**Figure S7.** Subgroup analysis of in-hospital major bleeding based on different risk of GRACE and CRUSADE adjusted by the model 2

**Figure S8.** Subgroup analysis of in-hospital major adverse clinical events based on different risk of GRACE and CRUSADE adjusted by the model 1

---

1  
2  
3  
4 **Figure S9.** Subgroup analysis of in-hospital major adverse clinical events based on  
5  
6 different risk of GRACE and CRUSADE adjusted by the model 2  
7  
8  
9  
10  
11  
12  
13  
14  
15  
16  
17  
18  
19  
20  
21  
22  
23  
24  
25  
26  
27  
28  
29  
30  
31  
32  
33  
34  
35  
36  
37  
38  
39  
40  
41  
42  
43  
44  
45  
46  
47  
48  
49  
50  
51  
52  
53  
54  
55  
56  
57  
58  
59  
60

For peer review only

**Table 1. The baseline characteristics at index hospitalization**

|                                                   | All patients*          |                     |                   | <i>P</i><br>value |
|---------------------------------------------------|------------------------|---------------------|-------------------|-------------------|
|                                                   | Uninfected<br>(N=5009) | Infected<br>(N=206) | Total<br>(N=5215) |                   |
| <b>Demographics</b>                               |                        |                     |                   |                   |
| Age, y                                            | 63.61 ± 10.30          | 70.86 ± 9.20        | 63.90 ± 10.36     | <.001             |
| Age ≥ 65 y                                        | 2380(47.5%)            | 157(76.2%)          | 2537(48.6%)       | <.001             |
| Female                                            | 1229(24.5%)            | 54(26.2%)           | 1283(24.6%)       | 0.584             |
| Weight, kg                                        | 65.69 ± 11.67          | 63.55 ± 12.22       | 65.60 ± 11.70     | 0.011             |
| Heart rate, bpm                                   | 73.81 ± 10.91          | 77.75 ± 15.62       | 73.96 ± 11.16     | <.001             |
| Blood pressure, mmHg                              |                        |                     |                   |                   |
| Systolic                                          | 133.37 ± 19.03         | 136.60 ± 22.99      | 133.50 ± 19.21    | 0.049             |
| Diastolic                                         | 76.99 ± 11.27          | 75.81 ± 12.56       | 76.95 ± 11.32     | 0.188             |
| <b>Medical history and risk factors,<br/>n(%)</b> |                        |                     |                   |                   |
| Current Smoker                                    | 1306(26.1%)            | 53(25.7%)           | 1359(26.1%)       | 0.912             |
| Cardiac arrest                                    | 8(0.2%)                | 0(0.0%)             | 8(0.2%)           | 0.566             |
| Myocardial Infarction                             | 784(15.7%)             | 53(25.7%)           | 837(16.0%)        | <.001             |
| Percutaneous coronary intervention                | 940(18.8%)             | 35(17.0%)           | 975(18.7%)        | 0.522             |
| Coronary-artery bypass surgery                    | 70(1.4%)               | 5(2.4%)             | 75(1.4%)          | 0.224             |
| Stroke                                            | 302(6.0%)              | 23(11.2%)           | 325(6.2%)         | 0.003             |
| Atrial Fibrillation                               | 125(2.5%)              | 8(3.9%)             | 133(2.6%)         | 0.216             |
| Hypertension                                      | 3259(65.1%)            | 157(76.2%)          | 3416(65.5%)       | <.001             |
| Diabetes mellitus                                 | 1509(30.1%)            | 96(46.6%)           | 1605(30.8%)       | <.001             |
| <b>Presentation characteristics</b>               |                        |                     |                   |                   |

|                                        | All patients*          |                     |                   | <i>P</i><br>value |
|----------------------------------------|------------------------|---------------------|-------------------|-------------------|
|                                        | Uninfected<br>(N=5009) | Infected<br>(N=206) | Total<br>(N=5215) |                   |
| IABP                                   | 44(0.9%)               | 30(14.6%)           | 74(1.4%)          | <.001             |
| CRUSAD                                 | 42.12 ± 12.04          | 40.66 ± 13.19       | 42.06 ± 12.09     | 0.097             |
| GRACE                                  | 124.54 ± 27.67         | 143.75 ± 29.82      | 125.17 ± 27.94    | <.001             |
| Type of disease, n(%)                  |                        |                     |                   |                   |
| NSTEMI                                 | 3121(62.3%)            | 131(63.6%)          | 3252(62.4%)       | 0.709             |
| Unstable angina                        | 1888(37.7%)            | 75(36.4%)           | 1963(37.6%)       |                   |
| Heart Failure, n(%)                    | 489(9.8%)              | 66(32.0%)           | 555(10.6%)        | <.001             |
| LVEF, %                                | 61.79 ± 10.77          | 55.99 ± 13.71       | 61.54 ± 10.98     | <.001             |
| eGFR, mL/min/1.73m <sup>2</sup>        | 81.64 ± 24.99          | 60.85 ± 28.14       | 80.81 ± 25.45     | <.001             |
| eGFR ≤ 60, n(%)                        | 851(17.0%)             | 101(49.0%)          | 952(18.3%)        | <.001             |
| Serum creatinine, µmol/dL              | 1.05 ± 0.69            | 1.55 ± 1.28         | 1.07 ± 0.73       | <.001             |
| Hematocrit, g/L                        | 0.39 ± 0.05            | 0.35 ± 0.06         | 0.39 ± 0.05       | <.001             |
| Anemia, n(%)                           | 1605(32.0%)            | 127(61.7%)          | 1732(33.2%)       | <.001             |
| Cardiac biomarker positive, n(%)       | 2984(62.3%)            | 120(61.5%)          | 3104(62.2%)       | 0.836             |
| <b>In hospital medication, n(%)</b>    |                        |                     |                   |                   |
| Dual antiplatelet therapy              | 4845(96.7%)            | 194(94.2%)          | 5039(96.6%)       | 0.047             |
| Statin                                 | 4909(98.0%)            | 202(98.1%)          | 5074(97.3%)       | 0.956             |
| ACE inhibitor or ARB                   | 3939(78.6%)            | 170(82.5%)          | 4109(78.8%)       | 0.181             |
| Calcium-channel blocker                | 1066(21.3%)            | 72(35.0%)           | 1138(21.8%)       | <.001             |
| β-blocker                              | 4245(84.7%)            | 165(80.1%)          | 4410(84.6%)       | 0.070             |
| <b>Procedure characteristics, n(%)</b> |                        |                     |                   |                   |

|                         | All patients*          |                     |                   | <i>P</i><br>value |
|-------------------------|------------------------|---------------------|-------------------|-------------------|
|                         | Uninfected<br>(N=5009) | Infected<br>(N=206) | Total<br>(N=5215) |                   |
| Radial access           | 4470(89.2%)            | 154(74.8%)          | 4624(88.7%)       | <.001             |
| Coronary anatomy        |                        |                     |                   |                   |
| Any left main           | 690(13.8%)             | 49(23.8%)           | 739(14.2%)        | <.001             |
| Multi-vessel disease    | 3072(61.3%)            | 127(61.7%)          | 3199(61.3%)       |                   |
| Others                  | 1247(24.9%)            | 30(14.6%)           | 1277(24.5%)       |                   |
| Treated vessel          |                        |                     |                   |                   |
| Any left main           | 480(9.6%)              | 35(17.0%)           | 515(9.9%)         | 0.002             |
| Multi-vessel            | 1764(35.2%)            | 66(32.0%)           | 1830(35.1%)       |                   |
| Others                  | 2765(55.2%)            | 105(51.0%)          | 2870(55.0%)       |                   |
| Stent type              |                        |                     |                   |                   |
| Drug eluting stent      | 5004(99.9%)            | 206(100.0%)         | 5210(99.9%)       | 0.902             |
| Bare metal stent        | 2(0.0%)                | 0(0.0%)             | 2(0.0%)           |                   |
| PTCA or aspiration only | 3(0.1%)                | 0(0.0%)             | 3(0.1%)           |                   |
| Number of stents        | 2(1~3)                 | 2(1~3)              | 2(1~3)            | 0.048             |
| Total length of stents  | 45(27~71)              | 48 (31~76)          | 45(27~71)         | 0.053             |
| Thrombus aspiration     | 61(1.2%)               | 5(2.4%)             | 66(1.3%)          | 0.128             |
| Time to procedure       | 1(1~2)                 | 2(1~6)              | 1(1~2)            | <.001             |
| In 24 hours             | 2817(56.2%)            | 81(39.3%)           | 2898(55.6%)       | <.001             |
| 24~72 hours             | 1505(30.0%)            | 47(22.8%)           | 1552(29.8%)       |                   |
| > 72 hours              | 687(13.7%)             | 78(37.9%)           | 765(14.7%)        |                   |
| In-hospital days        | 4(3~6)                 | 11(7~18)            | 4(3~6)            | <.001             |

\*Abbreviations: IABP=intra-aortic balloon pump; GRACE=Global Registry of Acute

Coronary Events; CRUSADE=Can Rapid Risk Stratification of Unstable Angina Patients Suppress Adverse Outcomes With Early Implementation of the ACC/AHA Guidelines; NSTEMI=Non-ST elevation myocardial infarction; LVEF=left ventricular ejection fraction; eGFR=Estimate glomerular filtration rate; PTCA=Percutaneous transluminal coronary angioplasty. ACE=angiotensin-converting enzyme; ARB=angiotensin receptor blocker.

**Table 2 In-hospital and Long-term clinical outcomes**

| <b>Outcomes</b>                                  | <b>Uninfected<br/>(N=5009)</b> | <b>Infected<br/>(N=206)</b> | <b>P value</b> |
|--------------------------------------------------|--------------------------------|-----------------------------|----------------|
| <b>In-hospital outcomes</b>                      |                                |                             |                |
| Death*                                           | 10(0.2%)                       | 9(4.4%)                     | <.001          |
| Myocardial infarction                            | 17(0.3%)                       | 1(0.5%)                     | 0.726          |
| Death or myocardial infarction                   | 27(0.5%)                       | 10(4.9%)                    | <.001          |
| Major bleeding                                   | 62(1.2%)                       | 34(16.5%)                   | <.001          |
| Death or Myocardial infarction or major bleeding | 84(1.7%)                       | 44(21.4%)                   | <.001          |
| <b>Long-term outcomes</b>                        |                                |                             |                |
| <b>30 days</b>                                   |                                |                             |                |
| Death                                            | 17(0.3%)                       | 10(4.9%)                    | <.001          |
| Major bleeding                                   | 61(1.2%)                       | 31(15.0%)                   | <.001          |
| Death or major bleeding                          | 74(1.5%)                       | 37(18.0%)                   | <.001          |
| <b>One year</b>                                  |                                |                             |                |
| Death                                            | 93(1.9%)                       | 35(17.0%)                   | <.001          |
| Major bleeding                                   | 75(1.5%)                       | 34(16.5%)                   | <.001          |
| Death or major bleeding                          | 161(3.2%)                      | 56(27.2%)                   | <.001          |
| <b>Three years</b>                               |                                |                             |                |



| <b>Outcomes</b>         | <b>Uninfected<br/>(N=5009)</b> | <b>Infected<br/>(N=206)</b> | <b>P value</b> |
|-------------------------|--------------------------------|-----------------------------|----------------|
| Death                   | 346(6.9%)                      | 61(29.6%)                   | <.001          |
| Major bleeding          | 111(2.2%)                      | 36(17.5%)                   | <.001          |
| Death or major bleeding | 437(8.7%)                      | 81(39.3%)                   | <.001          |

\*All cause death;

For peer review only

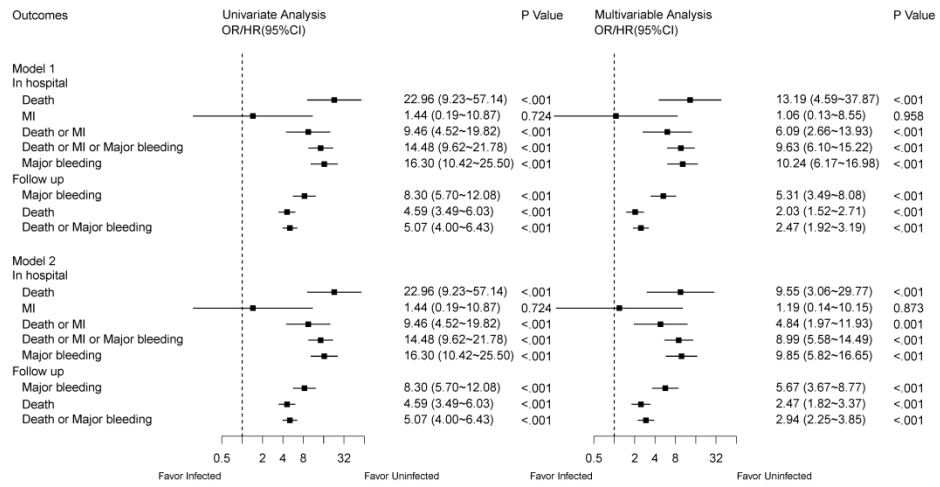

Figure 1. Univariate and multivariable logistic or Cox analysis for clinical outcomes

423x225mm (300 x 300 DPI)

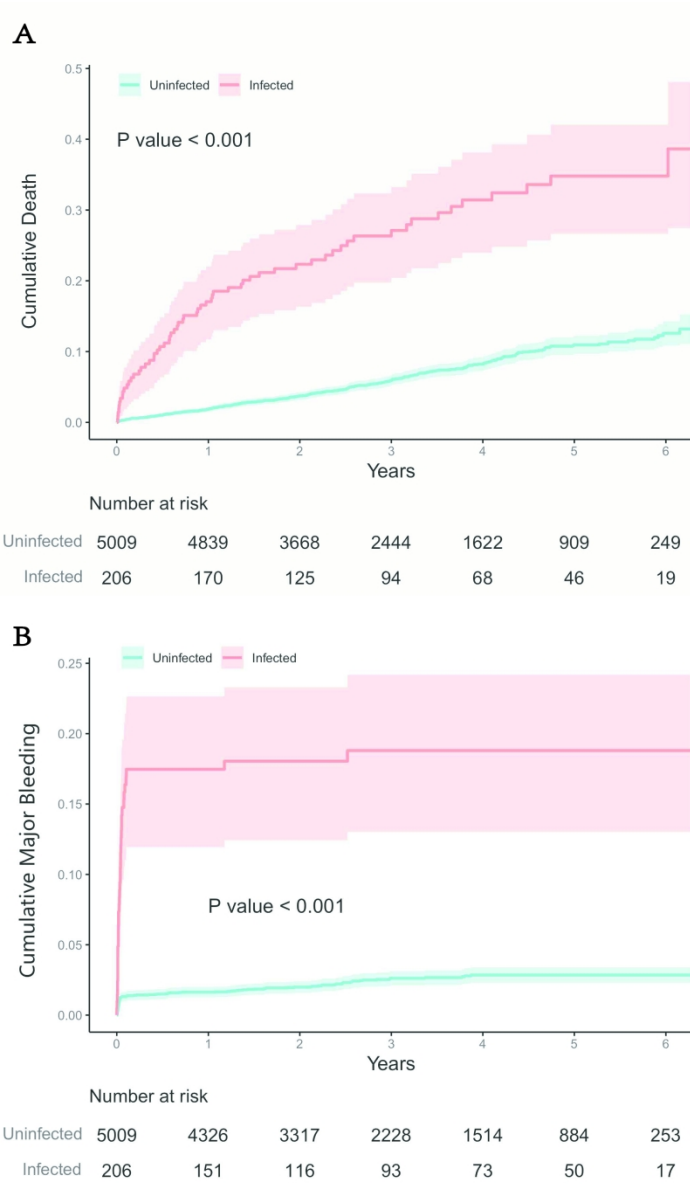

Figure 2. Kaplan-Meier estimated event rates of all cause death (A) and major bleeding (B)

1  
2  
3  
4  
5  
6  
7  
8  
9  
10  
11  
12  
13  
14  
15  
16  
17  
18  
19  
20  
21  
22  
23  
24  
25  
26  
27  
28  
29  
30  
31  
32  
33  
34  
35  
36  
37  
38  
39  
40  
41  
42  
43  
44  
45  
46  
47  
48  
49  
50  
51  
52  
53  
54  
55  
56  
57  
58  
59  
60

## Supplementary Appendix 1

1  
2  
3  
4  
5 **Table S1.** Univariate and multivariable logistic for clinical outcomes by stratifying infection  
6  
7 subtype.  
8  
9

10 **Figure S1.** Time from hospital admission to the diagnosis of infection among all patients.  
11  
12

13 **Figure S2.** Kaplan-Meier estimated event rates of all cause death or major bleeding  
14  
15

16 **Figure S3.** Subgroup analysis of in-hospital all cause death  
17  
18

19 **Figure S4.** Subgroup analysis of in-hospital major bleeding  
20  
21

22 **Figure S5.** Subgroup analysis of in-hospital major adverse clinical events  
23  
24

25 **Figure S6.** Subgroup analysis of in-hospital major bleeding based on different risk of GRACE  
26  
27 and CRUSADE adjusted by the model 1  
28  
29

30 **Figure S7.** Subgroup analysis of in-hospital major bleeding based on different risk of GRACE  
31  
32 and CRUSADE adjusted by the model 2  
33  
34

35 **Figure S8.** Subgroup analysis of in-hospital major adverse clinical events based on different risk  
36  
37 of GRACE and CRUSADE adjusted by the model 1  
38  
39

40 **Figure S9.** Subgroup analysis of in-hospital major adverse clinical events based on different risk  
41  
42 of GRACE and CRUSADE adjusted by the model 2  
43  
44  
45  
46  
47  
48  
49  
50  
51  
52  
53  
54  
55  
56  
57  
58  
59  
60

**Table S1 Univariate and multivariable logistic for clinical outcomes by stratifying infection subtype.**

| Outcomes<br>(Compare with uninfected patients) | Univariate analysis |             |         | Multivariable analysis |             |        |
|------------------------------------------------|---------------------|-------------|---------|------------------------|-------------|--------|
|                                                | OR                  | 95%CI       | P value | OR                     | 95%CI       | Pvalue |
| <b>Model 1</b>                                 |                     |             |         |                        |             |        |
| <b>In hospital</b>                             |                     |             |         |                        |             |        |
| <b>Death</b>                                   |                     |             |         |                        |             |        |
| Community acquired pulmonary infections        | 17.24               | 4.66~63.73  | <.001   | 8.56                   | 2.06~35.57  | 0.003  |
| Hospital acquired pulmonary infections         | 23.25               | 4.95~109.28 | <.001   | 11.51                  | 2.15~61.49  | 0.004  |
| Urinary tract infection                        | 31.24               | 3.78~258.58 | 0.001   | 21.59                  | 2.32~200.48 | 0.007  |
| Other infection                                | 29.99               | 8.01~112.27 | <.001   | 23.14                  | 5.59~95.86  | <.001  |
| <b>Major Bleeding</b>                          |                     |             |         |                        |             |        |
| Community acquired pulmonary infections        | 28.32               | 16.54~48.48 | <.001   | 18.13                  | 9.92~33.16  | <.001  |
| Hospital acquired pulmonary infections         | 14.80               | 6.37~34.43  | <.001   | 9.04                   | 3.63~22.49  | <.001  |
| Urinary tract infection                        | 5.16                | 0.67~39.50  | 0.114   | 3.10                   | 0.39~24.51  | 0.283  |
| Other infection                                | 4.95                | 1.50~16.31  | 0.009   | 3.25                   | 0.95~11.13  | 0.061  |
| <b>Death or MI or Major Bleeding</b>           |                     |             |         |                        |             |        |
| Community acquired pulmonary infections        | 21.85               | 13.05~36.59 | <.001   | 14.23                  | 8.07~25.10  | <.001  |
| Hospital acquired pulmonary infections         | 16.69               | 8.01~34.77  | <.001   | 11.28                  | 5.14~24.76  | <.001  |
| Urinary tract infection                        | 3.76                | 0.49~28.65  | 0.202   | 2.44                   | 0.31~19.04  | 0.396  |
| Other infection                                | 6.26                | 2.43~16.13  | <.001   | 4.51                   | 1.69~12.01  | 0.003  |
| <b>Follow up</b>                               |                     |             |         |                        |             |        |
| <b>Death</b>                                   |                     |             |         |                        |             |        |
| Community acquired pulmonary infections        | 5.52                | 3.78~8.06   | <.001   | 2.06                   | 1.39~3.06   | <.001  |
| Hospital acquired pulmonary infections         | 6.16                | 3.78~10.02  | <.001   | 2.57                   | 1.56~4.24   | <.001  |
| Urinary tract infection                        | 3.66                | 1.37~9.82   | 0.010   | 2.38                   | 0.88~6.39   | 0.086  |
| Other infection                                | 2.62                | 1.44~4.79   | 0.002   | 1.45                   | 0.79~2.66   | 0.232  |
| <b>Major Bleeding</b>                          |                     |             |         |                        |             |        |
| Community acquired pulmonary infections        | 14.29               | 9.26~22.06  | <.001   | 8.86                   | 5.49~14.27  | <.001  |

| Outcomes<br>(Compare with uninfected patients) | Univariate analysis |             |         | Multivariable analysis |             |        |
|------------------------------------------------|---------------------|-------------|---------|------------------------|-------------|--------|
|                                                | OR                  | 95%CI       | P value | OR                     | 95%CI       | Pvalue |
| Hospital acquired pulmonary infections         | 7.08                | 3.30~15.20  | <.001   | 4.16                   | 1.87~9.27   | <.001  |
| Urinary tract infection                        | 2.54                | 0.35~18.13  | 0.354   | 1.66                   | 0.23~11.98  | 0.616  |
| Other infection                                | 2.49                | 0.79~7.83   | 0.119   | 1.83                   | 0.57~5.85   | 0.307  |
| <b>Death or Major Bleeding</b>                 |                     |             |         |                        |             |        |
| Community acquired pulmonary infections        | 6.83                | 4.99~9.35   | <.001   | 2.85                   | 2.05~3.97   | <.001  |
| Hospital acquired pulmonary infections         | 6.32                | 4.08~9.79   | <.001   | 2.93                   | 1.87~4.61   | <.001  |
| Urinary tract infection                        | 2.85                | 1.07~7.64   | 0.037   | 1.78                   | 0.66~4.78   | 0.253  |
| Other infection                                | 2.62                | 1.51~4.55   | 0.001   | 1.60                   | 0.92~2.80   | 0.099  |
| <b>Model 2</b>                                 |                     |             |         |                        |             |        |
| <b>In hospital</b>                             |                     |             |         |                        |             |        |
| <b>Death</b>                                   |                     |             |         |                        |             |        |
| Community acquired pulmonary infections        | 17.24               | 4.66~63.73  | <.001   | 2.01                   | 0.37~10.86  | 0.418  |
| Hospital acquired pulmonary infections         | 23.25               | 4.95~109.28 | <.001   | 6.48                   | 0.92~45.66  | 0.061  |
| Urinary tract infection                        | 31.24               | 3.78~258.58 | 0.001   | 14.68                  | 0.96~223.51 | 0.053  |
| Other infection                                | 29.99               | 8.01~112.27 | <.001   | 5.02                   | 0.98~25.62  | 0.052  |
| <b>Major Bleeding</b>                          |                     |             |         |                        |             |        |
| Community acquired pulmonary infections        | 28.32               | 16.54~48.48 | <.001   | 11.91                  | 6.10~23.28  | <.001  |
| Hospital acquired pulmonary infections         | 14.80               | 6.37~34.43  | <.001   | 7.47                   | 2.80~19.90  | <.001  |
| Urinary tract infection                        | 5.16                | 0.67~39.50  | 0.114   | 1.92                   | 0.15~25.23  | 0.619  |
| Other infection                                | 4.95                | 1.50~16.31  | 0.009   | 1.05                   | 0.26~4.23   | 0.942  |
| <b>Death or MI or Major Bleeding</b>           |                     |             |         |                        |             |        |
| Community acquired pulmonary infections        | 21.85               | 13.05~36.59 | <.001   | 9.69                   | 5.12~18.37  | <.001  |
| Hospital acquired pulmonary infections         | 16.69               | 8.01~34.77  | <.001   | 10.00                  | 4.33~23.12  | <.001  |
| Urinary tract infection                        | 3.76                | 0.49~28.65  | 0.202   | 1.59                   | 0.13~19.16  | 0.713  |
| Other infection                                | 6.26                | 2.43~16.13  | <.001   | 1.71                   | 0.54~5.35   | 0.360  |
| <b>Follow up</b>                               |                     |             |         |                        |             |        |
| <b>Death</b>                                   |                     |             |         |                        |             |        |
| Community acquired pulmonary infections        | 5.52                | 3.78~8.06   | <.001   | 2.70                   | 1.81~4.03   | <.001  |
| Hospital acquired pulmonary infections         | 6.16                | 3.78~10.02  | <.001   | 3.56                   | 2.15~5.90   | <.001  |

| Outcomes<br>(Compare with uninfected patients) | Univariate analysis |            |         | Multivariable analysis |            |        |
|------------------------------------------------|---------------------|------------|---------|------------------------|------------|--------|
|                                                | OR                  | 95%CI      | P value | OR                     | 95%CI      | Pvalue |
| Urinary tract infection                        | 3.66                | 1.37~9.82  | 0.010   | 2.90                   | 1.08~7.80  | 0.034  |
| Other infection                                | 2.62                | 1.44~4.79  | 0.002   | 1.32                   | 0.71~2.44  | 0.376  |
| <b>Major Bleeding</b>                          | 14.29               | 9.26~22.06 | <.001   | 6.30                   | 3.79~10.49 | <.001  |
| Community acquired pulmonary infections        | 7.08                | 3.30~15.20 | <.001   | 3.51                   | 1.57~7.84  | 0.002  |
| Hospital acquired pulmonary infections         | 2.54                | 0.35~18.13 | 0.354   | 1.42                   | 0.19~10.39 | 0.731  |
| Urinary tract infection                        | 2.49                | 0.79~7.83  | 0.119   | 1.01                   | 0.31~3.29  | 0.981  |
| Other infection                                |                     |            |         |                        |            |        |
| <b>Death or Major Bleeding</b>                 |                     |            |         |                        |            |        |
| Community acquired pulmonary infections        | 6.83                | 4.99~9.35  | <.001   | 3.55                   | 2.55~4.94  | <.001  |
| Hospital acquired pulmonary infections         | 6.32                | 4.08~9.79  | <.001   | 3.46                   | 2.20~5.45  | <.001  |
| Urinary tract infection                        | 2.85                | 1.07~7.64  | 0.037   | 1.96                   | 0.73~5.28  | 0.181  |
| Other infection                                | 2.62                | 1.51~4.55  | 0.001   | 1.38                   | 0.78~2.41  | 0.266  |

Model 1 included age, gender, current smokers, heart failure, anemia, type of disease, estimate glomerular filtration rate.

Model 2 included diabetes mellitus, hypertension, prior myocardial infarction, prior stroke, radial access, chronic kidney disease, intra-aortic balloon pump.



1  
2  
3  
4  
5  
6  
7  
8  
9  
10  
11  
12  
13  
14  
15  
16  
17  
18  
19  
20  
21  
22  
23  
24  
25  
26  
27  
28  
29  
30  
31  
32  
33  
34  
35  
36  
37  
38  
39  
40  
41  
42  
43  
44  
45  
46  
47  
48  
49  
50  
51  
52  
53  
54  
55  
56  
57  
58  
59  
60

**Figure S1.** Time from hospital admission to the diagnosis of infection among all patients.

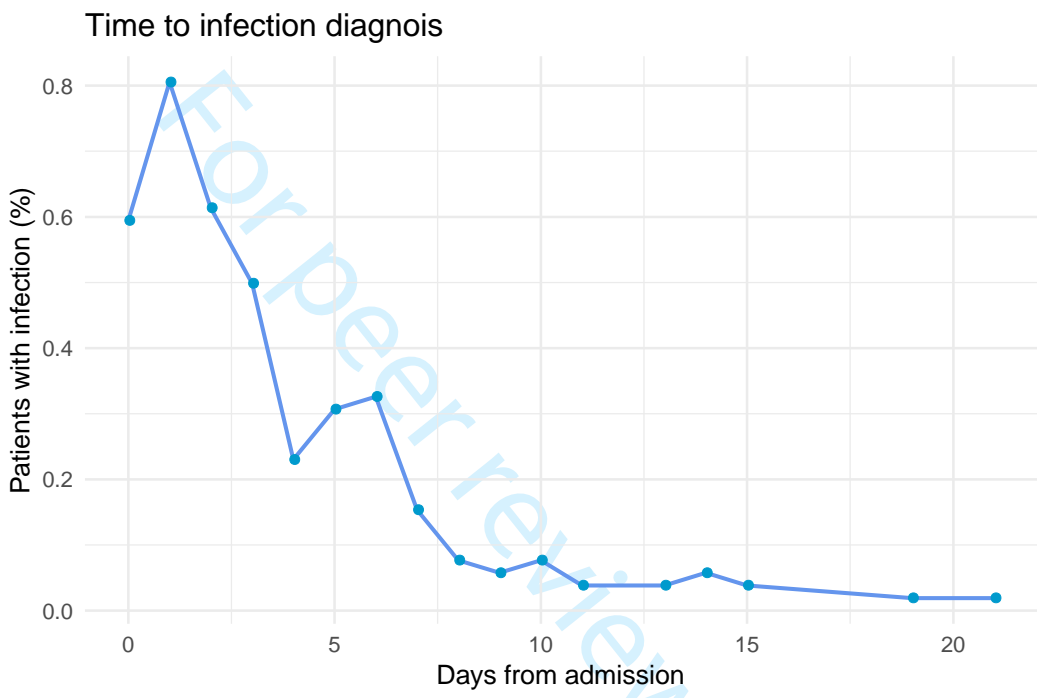

**Figure S2.** Kaplan-Meier estimated event rates of all cause death or major bleeding

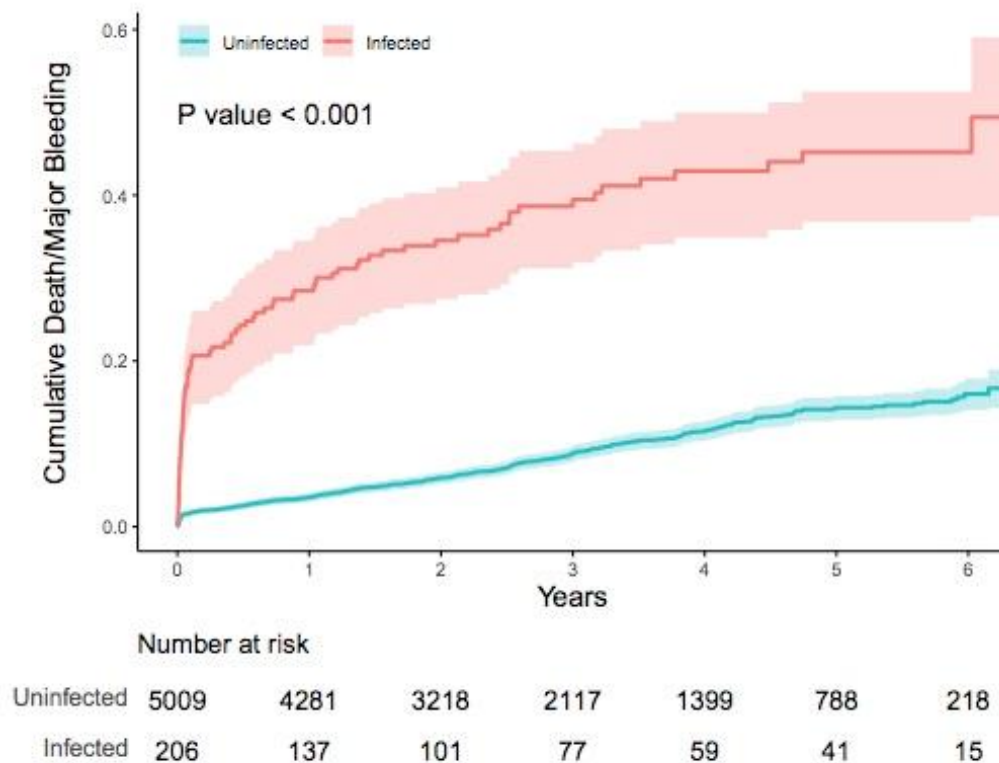

Figure S3. Subgroup analysis of in-hospital all cause death

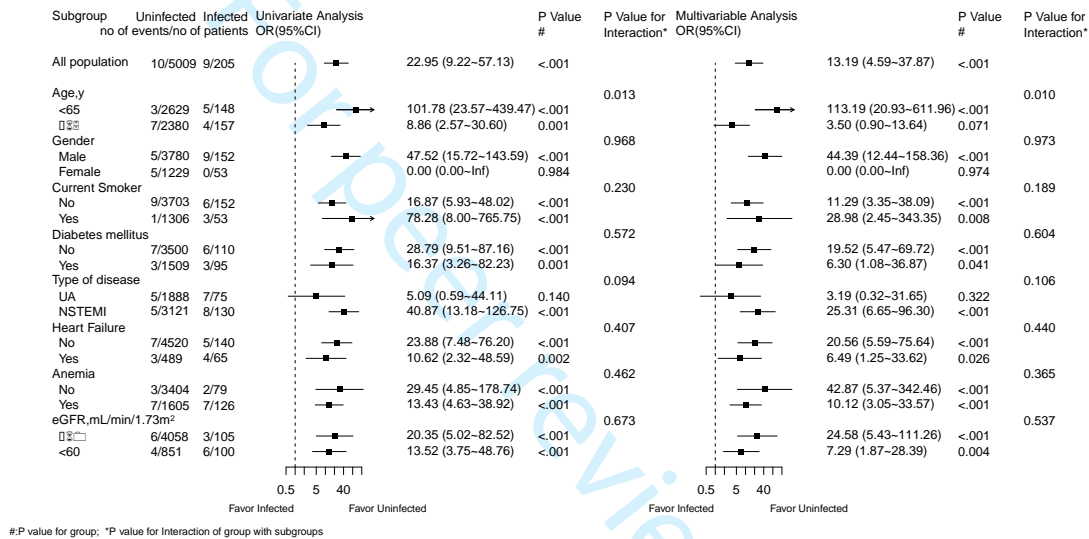

Figure S4. Subgroup analysis of in-hospital major bleeding

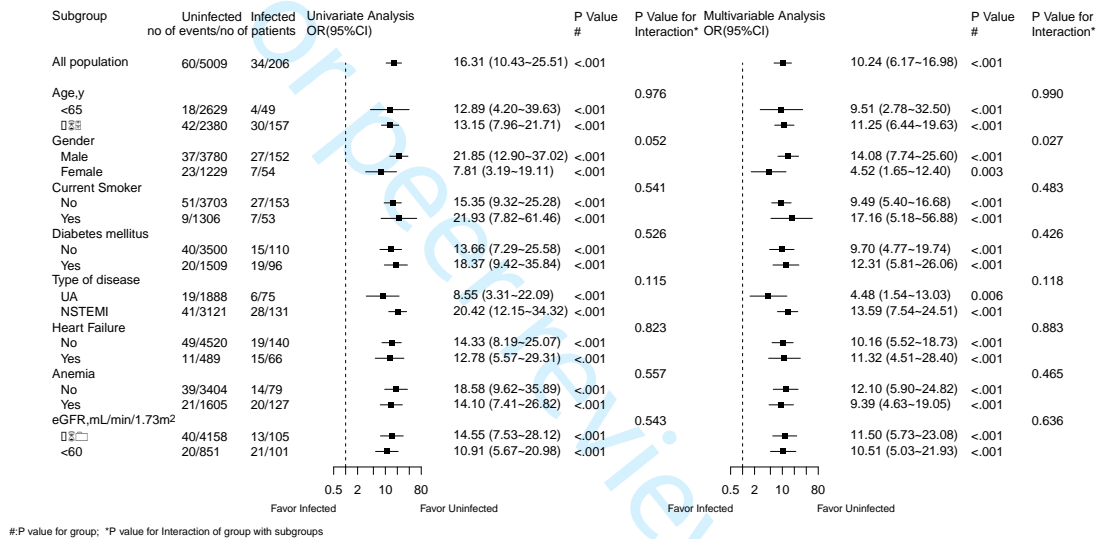

Figure S5. Subgroup analysis of in-hospital major adverse clinical events

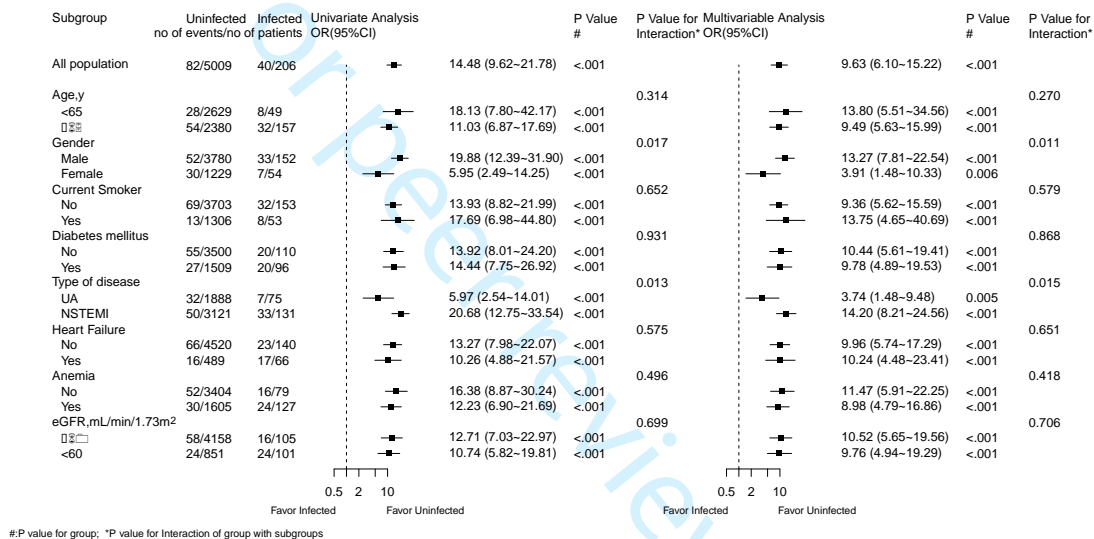

#P value for group; \*P value for Interaction of group with subgroups

**Figure S6.** Subgroup analysis of in-hospital major bleeding based on different risk of GRACE and CRUSADE adjusted by the model 1

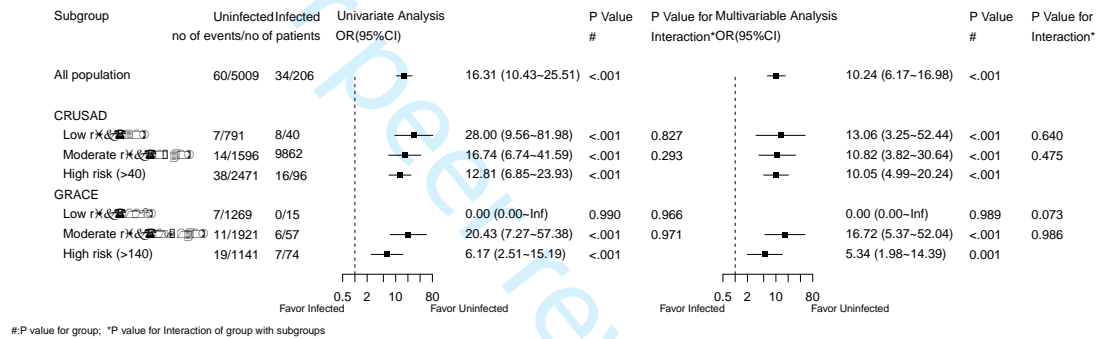

**Figure S7.** Subgroup analysis of in-hospital major bleeding based on different risk of GRACE and CRUSADE adjusted by the model 2

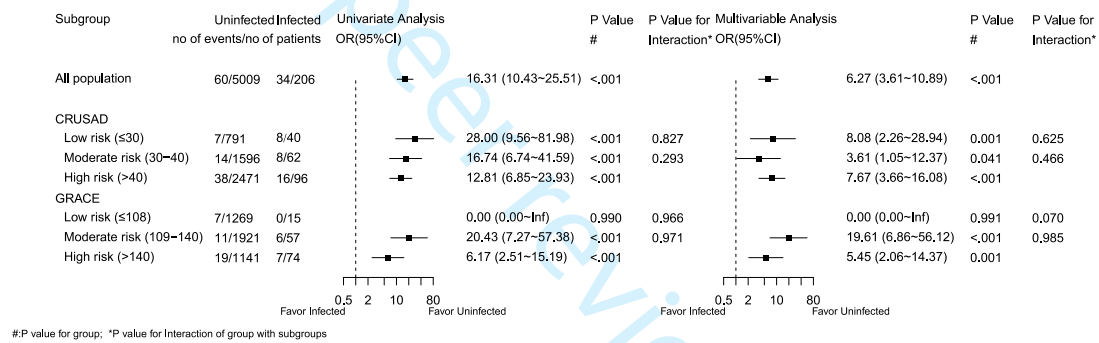

**Figure S8.** Subgroup analysis of in-hospital major adverse clinical events based on different risk of GRACE and CRUSADE adjusted by the model 1

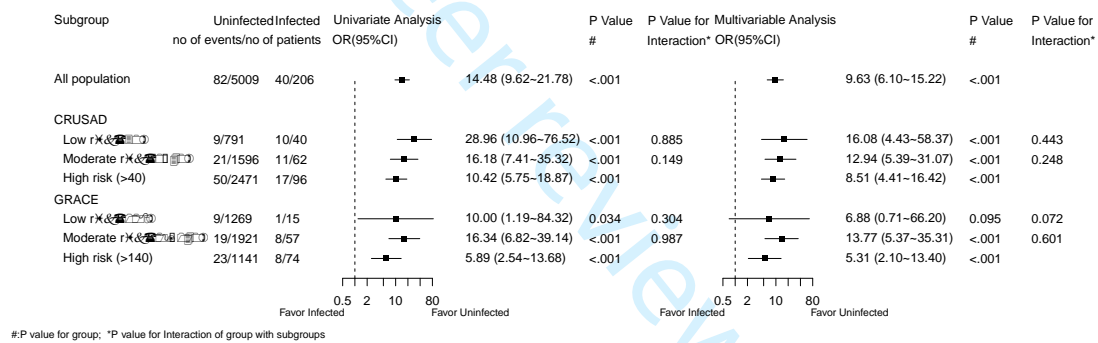



**Figure S9.** Subgroup analysis of in-hospital major adverse clinical events based on different risk of GRACE and CRUSADE adjusted by the model 2

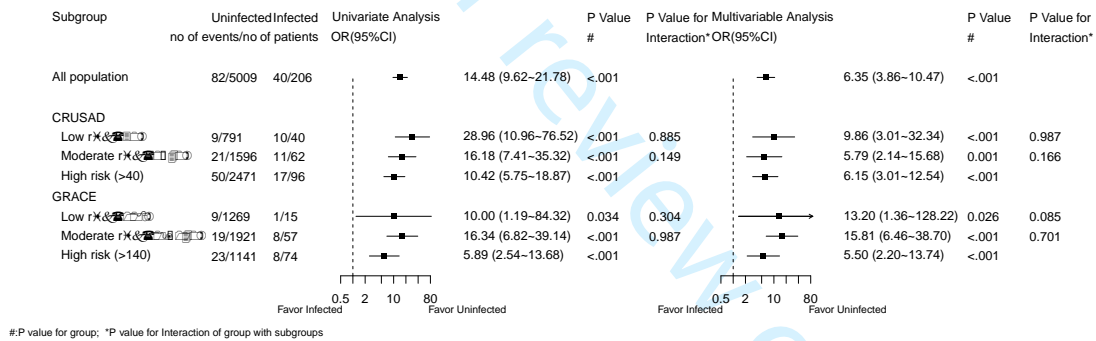

STROBE Statement—Checklist of items that should be included in reports of *cohort studies*

|                           | Item No | Recommendation                                                                                                                                                                                                                                                                                                         | Page No          |
|---------------------------|---------|------------------------------------------------------------------------------------------------------------------------------------------------------------------------------------------------------------------------------------------------------------------------------------------------------------------------|------------------|
| <b>Title and abstract</b> | 1       | (a) Indicate the study's design with a commonly used term in the title or the abstract<br>(b) Provide in the abstract an informative and balanced summary of what was done and what was found                                                                                                                          | 1<br>3-4         |
| <b>Introduction</b>       |         |                                                                                                                                                                                                                                                                                                                        |                  |
| Background/rationale      | 2       | Explain the scientific background and rationale for the investigation being reported                                                                                                                                                                                                                                   | 6                |
| Objectives                | 3       | State specific objectives, including any prespecified hypotheses                                                                                                                                                                                                                                                       | 6                |
| <b>Methods</b>            |         |                                                                                                                                                                                                                                                                                                                        |                  |
| Study design              | 4       | Present key elements of study design early in the paper                                                                                                                                                                                                                                                                | 7                |
| Setting                   | 5       | Describe the setting, locations, and relevant dates, including periods of recruitment, exposure, follow-up, and data collection                                                                                                                                                                                        | 7                |
| Participants              | 6       | (a) Give the eligibility criteria, and the sources and methods of selection of participants. Describe methods of follow-up<br>(b) For matched studies, give matching criteria and number of exposed and unexposed                                                                                                      | 7<br>NA          |
| Variables                 | 7       | Clearly define all outcomes, exposures, predictors, potential confounders, and effect modifiers. Give diagnostic criteria, if applicable                                                                                                                                                                               | 7-8 & supplement |
| Data sources/measurement  | 8*      | For each variable of interest, give sources of data and details of methods of assessment (measurement). Describe comparability of assessment methods if there is more than one group                                                                                                                                   | supplement       |
| Bias                      | 9       | Describe any efforts to address potential sources of bias                                                                                                                                                                                                                                                              | 8-9              |
| Study size                | 10      | Explain how the study size was arrived at                                                                                                                                                                                                                                                                              | 7                |
| Quantitative variables    | 11      | Explain how quantitative variables were handled in the analyses. If applicable, describe which groupings were chosen and why                                                                                                                                                                                           | 8                |
| Statistical methods       | 12      | (a) Describe all statistical methods, including those used to control for confounding<br>(b) Describe any methods used to examine subgroups and interactions<br>(c) Explain how missing data were addressed<br>(d) If applicable, explain how loss to follow-up was addressed<br>(e) Describe any sensitivity analyses | 8-9 & supplement |
| <b>Results</b>            |         |                                                                                                                                                                                                                                                                                                                        |                  |
| Participants              | 13*     | (a) Report numbers of individuals at each stage of study—eg numbers potentially eligible, examined for eligibility, confirmed eligible, included in the study, completing follow-up, and analysed<br>(b) Give reasons for non-participation at each stage<br>(c) Consider use of a flow diagram                        | 9-10             |
| Descriptive data          | 14*     | (a) Give characteristics of study participants (eg demographic, clinical, social) and information on exposures and potential confounders<br>(b) Indicate number of participants with missing data for each variable of interest<br>(c) Summarise follow-up time (eg, average and total amount)                         | 9-10             |

|    |                          |     |                                                                                           |                       |
|----|--------------------------|-----|-------------------------------------------------------------------------------------------|-----------------------|
| 1  | Outcome data             | 15* | Report numbers of outcome events or summary measures over time                            | 9-10                  |
| 2  | Main results             | 16  | (a) Give unadjusted estimates and, if applicable, confounder-adjusted estimates and       | 10-11 &<br>supplement |
| 3  |                          |     | their precision (eg, 95% confidence interval). Make clear which confounders were          |                       |
| 4  |                          |     | adjusted for and why they were included                                                   |                       |
| 5  |                          |     | (b) Report category boundaries when continuous variables were categorized                 |                       |
| 6  |                          |     | (c) If relevant, consider translating estimates of relative risk into absolute risk for a |                       |
| 7  |                          |     | meaningful time period                                                                    |                       |
| 8  | Other analyses           | 17  | Report other analyses done—eg analyses of subgroups and interactions, and                 | 11 &<br>supplement    |
| 9  |                          |     | sensitivity analyses                                                                      |                       |
| 10 | <b>Discussion</b>        |     |                                                                                           |                       |
| 11 | Key results              | 18  | Summarise key results with reference to study objectives                                  | 11-12                 |
| 12 | Limitations              | 19  | Discuss limitations of the study, taking into account sources of potential bias or        | 14                    |
| 13 |                          |     | imprecision. Discuss both direction and magnitude of any potential bias                   |                       |
| 14 | Interpretation           | 20  | Give a cautious overall interpretation of results considering objectives, limitations,    | 14-15                 |
| 15 |                          |     | multiplicity of analyses, results from similar studies, and other relevant evidence       |                       |
| 16 | Generalisability         | 21  | Discuss the generalisability (external validity) of the study results                     | 14-15                 |
| 17 | <b>Other information</b> |     |                                                                                           |                       |
| 18 | Funding                  | 22  | Give the source of funding and the role of the funders for the present study and, if      | 15-16                 |
| 19 |                          |     | applicable, for the original study on which the present article is based                  |                       |

\*Give information separately for exposed and unexposed groups.

**Note:** An Explanation and Elaboration article discusses each checklist item and gives methodological background and published examples of transparent reporting. The STROBE checklist is best used in conjunction with this article (freely available on the Web sites of PLoS Medicine at <http://www.plosmedicine.org/>, Annals of Internal Medicine at <http://www.annals.org/>, and Epidemiology at <http://www.epidem.com/>). Information on the STROBE Initiative is available at <http://www.strobe-statement.org>.

# BMJ Open

## Impact of infection for non-ST-elevation acute coronary syndrome patients undergoing percutaneous coronary intervention: insight from a multicentre observational cohort from China

|                                 |                                                                                                                                                                                                                                                                                                                                                                                                                                                                                                                                                                                                                                                                                                                                                                                                                                                                                                                                                                                                                                                                                                                                                                                                                                                                                                                                                                                                                                                                                                                                                                                                                                                                                                                                                                                                                                                                                                                                   |
|---------------------------------|-----------------------------------------------------------------------------------------------------------------------------------------------------------------------------------------------------------------------------------------------------------------------------------------------------------------------------------------------------------------------------------------------------------------------------------------------------------------------------------------------------------------------------------------------------------------------------------------------------------------------------------------------------------------------------------------------------------------------------------------------------------------------------------------------------------------------------------------------------------------------------------------------------------------------------------------------------------------------------------------------------------------------------------------------------------------------------------------------------------------------------------------------------------------------------------------------------------------------------------------------------------------------------------------------------------------------------------------------------------------------------------------------------------------------------------------------------------------------------------------------------------------------------------------------------------------------------------------------------------------------------------------------------------------------------------------------------------------------------------------------------------------------------------------------------------------------------------------------------------------------------------------------------------------------------------|
| Journal:                        | <i>BMJ Open</i>                                                                                                                                                                                                                                                                                                                                                                                                                                                                                                                                                                                                                                                                                                                                                                                                                                                                                                                                                                                                                                                                                                                                                                                                                                                                                                                                                                                                                                                                                                                                                                                                                                                                                                                                                                                                                                                                                                                   |
| Manuscript ID                   | bmjopen-2020-038551.R1                                                                                                                                                                                                                                                                                                                                                                                                                                                                                                                                                                                                                                                                                                                                                                                                                                                                                                                                                                                                                                                                                                                                                                                                                                                                                                                                                                                                                                                                                                                                                                                                                                                                                                                                                                                                                                                                                                            |
| Article Type:                   | Original research                                                                                                                                                                                                                                                                                                                                                                                                                                                                                                                                                                                                                                                                                                                                                                                                                                                                                                                                                                                                                                                                                                                                                                                                                                                                                                                                                                                                                                                                                                                                                                                                                                                                                                                                                                                                                                                                                                                 |
| Date Submitted by the Author:   | 10-Jun-2020                                                                                                                                                                                                                                                                                                                                                                                                                                                                                                                                                                                                                                                                                                                                                                                                                                                                                                                                                                                                                                                                                                                                                                                                                                                                                                                                                                                                                                                                                                                                                                                                                                                                                                                                                                                                                                                                                                                       |
| Complete List of Authors:       | <p>Chen, Peng-yuan; Guangdong General Hospital's Nanhai Hospital, the Second Hospital of Nanhai District Foshan City, Department of Cardiology</p> <p>Liu, Yuanhui; Guangdong Cardiovascular Institute, Guangdong Provincial Key Laboratory of Coronary Heart Disease Prevention, Guangdong Provincial People's Hospital, Guangdong Academy of Medical Sciences, Department of Cardiology; The Second School of Clinical Medicine, Southern Medical University, Guangzhou, 510515, China.</p> <p>Duan, Chongyang; School of Public Health, Southern Medical University, Guangzhou, Biostatistics</p> <p>Jiang, Lei; Guangdong Cardiovascular Institute, Guangdong Provincial Key Laboratory of Coronary Heart Disease Prevention, Guangdong Provincial People's Hospital, Guangdong Academy of Medical Sciences, Department of Cardiology</p> <p>Wei, Xuebiao; Guangdong Cardiovascular Institute, Guangdong Provincial Key Laboratory of Coronary Heart Disease Prevention, Guangdong Provincial People's Hospital, Guangdong Academy of Medical Sciences, Department of Cardiology</p> <p>Guo, Wei; Guangdong Cardiovascular Institute, Guangdong Provincial Key Laboratory of Coronary Heart Disease Prevention, Guangdong Provincial People's Hospital, Guangdong Academy of Medical Sciences, Department of Cardiology</p> <p>Chen, Jiyan; Guangdong Cardiovascular Institute, Guangdong Provincial Key Laboratory of Coronary Heart Disease Prevention, Guangdong Provincial People's Hospital, Guangdong Academy of Medical Sciences, Department of Cardiology</p> <p>Tan, Ning; Guangdong Cardiovascular Institute, Guangdong Provincial Key Laboratory of Coronary Heart Disease Prevention, Guangdong Provincial People's Hospital, Guangdong Academy of Medical Sciences, Department of Cardiology</p> <p>He, Pengcheng; Guangdong Cardiovascular Institute, Department of Cardiology; Southern Medical University</p> |
| <b>Primary Subject Heading</b>: | Cardiovascular medicine                                                                                                                                                                                                                                                                                                                                                                                                                                                                                                                                                                                                                                                                                                                                                                                                                                                                                                                                                                                                                                                                                                                                                                                                                                                                                                                                                                                                                                                                                                                                                                                                                                                                                                                                                                                                                                                                                                           |
| Secondary Subject Heading:      | Infectious diseases                                                                                                                                                                                                                                                                                                                                                                                                                                                                                                                                                                                                                                                                                                                                                                                                                                                                                                                                                                                                                                                                                                                                                                                                                                                                                                                                                                                                                                                                                                                                                                                                                                                                                                                                                                                                                                                                                                               |
| Keywords:                       | Coronary heart disease < CARDIOLOGY, Coronary intervention <                                                                                                                                                                                                                                                                                                                                                                                                                                                                                                                                                                                                                                                                                                                                                                                                                                                                                                                                                                                                                                                                                                                                                                                                                                                                                                                                                                                                                                                                                                                                                                                                                                                                                                                                                                                                                                                                      |

1  
2  
3  
4  
5  
6  
7  
8  
9  
10  
11  
12  
13  
14  
15  
16  
17  
18  
19  
20  
21  
22  
23  
24  
25  
26  
27  
28  
29  
30  
31  
32  
33  
34  
35  
36  
37  
38  
39  
40  
41  
42  
43  
44  
45  
46  
47  
48  
49  
50  
51  
52  
53  
54  
55  
56  
57  
58  
59  
60

|  |                                            |
|--|--------------------------------------------|
|  | CARDIOLOGY, Cardiology < INTERNAL MEDICINE |
|  |                                            |

SCHOLARONE™  
Manuscripts

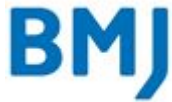

I, the Submitting Author has the right to grant and does grant on behalf of all authors of the Work (as defined in the below author licence), an exclusive licence and/or a non-exclusive licence for contributions from authors who are: i) UK Crown employees; ii) where BMJ has agreed a CC-BY licence shall apply, and/or iii) in accordance with the terms applicable for US Federal Government officers or employees acting as part of their official duties; on a worldwide, perpetual, irrevocable, royalty-free basis to BMJ Publishing Group Ltd ("BMJ") its licensees and where the relevant Journal is co-owned by BMJ to the co-owners of the Journal, to publish the Work in this journal and any other BMJ products and to exploit all rights, as set out in our [licence](#).

The Submitting Author accepts and understands that any supply made under these terms is made by BMJ to the Submitting Author unless you are acting as an employee on behalf of your employer or a postgraduate student of an affiliated institution which is paying any applicable article publishing charge ("APC") for Open Access articles. Where the Submitting Author wishes to make the Work available on an Open Access basis (and intends to pay the relevant APC), the terms of reuse of such Open Access shall be governed by a Creative Commons licence – details of these licences and which [Creative Commons](#) licence will apply to this Work are set out in our licence referred to above.

Other than as permitted in any relevant BMJ Author's Self Archiving Policies, I confirm this Work has not been accepted for publication elsewhere, is not being considered for publication elsewhere and does not duplicate material already published. I confirm all authors consent to publication of this Work and authorise the granting of this licence.

**Original article****Impact of infection for non-ST-elevation acute coronary syndrome patients undergoing percutaneous coronary intervention: insight from a multicentre observational cohort from China**

Pengyuan Chen<sup>1\*</sup>, MD; Yuanhui Liu<sup>2,3\*</sup>, MD, PhD; ChongYang Duan<sup>4\*</sup>, MD; Lei Jiang<sup>2</sup>, MD, PhD; XueBiao Wei<sup>2</sup>, MD; Wei Guo<sup>2</sup>, MD, PhD; JiYan Chen<sup>2</sup>, MD, PhD; Ning Tan<sup>2,3</sup>, MD, PhD; PengCheng He<sup>2,3</sup>, MD, PhD;

**Running Title:** Infection of NSTEMI-ACS and PCI

1. Department of Cardiology, Guangdong General Hospital's Nanhai Hospital, the Second Hospital of Nanhai District Foshan City, Foshan 528000, China.
2. Department of Cardiology, Guangdong Cardiovascular Institute, Guangdong Provincial Key Laboratory of Coronary Heart Disease Prevention, Guangdong Provincial People's Hospital, Guangdong Academy of Medical Sciences, Guangzhou 510100, China.
3. The Second School of Clinical Medicine, Southern Medical University, Guangzhou, 510515, China.
4. Department of Biostatistics, School of Public Health, Southern Medical University, Guangzhou, 510515, China

\*These authors were considered equally to the work.

**Address for corresponding author:** PengCheng He; Department of Cardiology, Guangdong Cardiovascular Institute, Guangdong Provincial Key Laboratory of Coronary Heart Disease Prevention, Guangdong Provincial People's Hospital,

1  
2  
3  
4 Guangdong Academy of Medical Sciences, Guangzhou 510100, China.  
5

6 Tel: +86-20-83819161 Fax: +86-20-83824369; [gdhpc100@126.com](mailto:gdhpc100@126.com)  
7  
8

9 **Words count:** 2278 words  
10  
11  
12  
13  
14  
15  
16  
17  
18  
19  
20  
21  
22  
23  
24  
25  
26  
27  
28  
29  
30  
31  
32  
33  
34  
35  
36  
37  
38  
39  
40  
41  
42  
43  
44  
45  
46  
47  
48  
49  
50  
51  
52  
53  
54  
55  
56  
57  
58  
59  
60

For peer review only



## Abstract

**Objectives:** we aimed to describe the association between in-hospital infection and the prognosis among non-ST-elevation acute coronary syndrome (NSTEMI) patients who received percutaneous coronary intervention (PCI).

**Design:** This observational cohort originated from the database for NSTEMI patients who underwent percutaneous coronary intervention from January 1, 2010, to December 31, 2014.

**Setting:** five centres from south China

**Participants:** This multicentre observational cohort study consecutively included 8197 NSTEMI patients who received PCI. Only patients with adequate information to diagnose or rule out infection were included. Patients were excluded if they were diagnosed with a malignant tumor, pregnant or cardiogenic shock at index date. Patients were grouped by whether they had in-hospital infection or not.

**Primary and secondary outcome measures:** The primary outcome was all-cause death and major bleeding during hospitalization. The secondary outcomes included all-cause death and major bleeding during follow-up and in-hospital myocardial infarction.

**Results:** Of the 5215 patients, 206 (3.95%) occurred infection. Patients with infection had a higher rate of in-hospital all-cause death and major bleeding (4.4% vs. 0.2%, 16.5% vs. 1.2% respectively,  $P < .001$ ). After adjusting for confounders, infection remained independently associated with in-hospital and long-term all-cause death (OR, 13.19, 95% CI: 4.59-37.87; HR, 2.03, 95% CI: 1.52-2.71;  $P < .001$ ) and major bleeding (OR, 10.24; 95% CI: 6.17-16.98; HR, 5.31, 95% CI: 3.49-8.08;  $P < .001$ ). Subgroup analysis

1  
2  
3  
4 confirmed these results.  
5

6 **Conclusions:** The incidence of infection is low in hospitalization, but it is associated  
7  
8  
9 with worse in-hospital and long-term outcomes.  
10

11 **Key Words:** Non-ST-elevation acute coronary syndrome; Percutaneous coronary  
12  
13  
14 intervention; Infection; Outcomes.  
15  
16

17  
18  
19  
20  
21  
22  
23  
24  
25  
26  
27  
28  
29  
30  
31  
32  
33  
34  
35  
36  
37  
38  
39  
40  
41  
42  
43  
44  
45  
46  
47  
48  
49  
50  
51  
52  
53  
54  
55  
56  
57  
58  
59  
60

For peer review only

### Strengths and limitations of this study

- We widely included NSTEMI-ACS patients who received PCI treatment from China.
- The characteristics of infection was detailed reported which included the time and infection type.
- Validation was done in different subgroups and variables which is our best effort based on the database.
- The potential bias may be neglected because of the study design.
- The etiology test of the infection is absent which limited the advanced exploration of the mechanism.

## Introduction

The incidence of non-ST-elevation acute coronary syndrome (NSTEMI) is increasing, and approximately 80% of all ACS patients are NSTEMI<sup>1</sup>. Despite that there are more comorbidities in patients with ST-segment elevation myocardial infarction (STEMI), the NSTEMI patients still suffer high rate of cardiovascular events both in elder and whole population.<sup>1, 2</sup> Identification of patients at risk of worse outcomes could contribute to targeted intervention, help direct care, reduce the incidence of subsequent events, and thus optimize resource utilization.

Infection can activate platelets and the coagulation system, resulting in the prothrombotic environment<sup>3, 4</sup>. Moreover, infection is an uncommon but important comorbidity in patients undergoing percutaneous coronary intervention (PCI)<sup>5-7</sup>. Although the reported incidence is less than 4%, infection has been proven to be associated with an increased risk of cardiovascular events among patients with STEMI<sup>8, 9</sup>. However, information about infection in patients with NSTEMI remains scanty. Only one study of 174 octogenarian patients with ACS evaluated the impact of infection on clinical outcomes<sup>10</sup>. Thus, we aimed to assess the incidence of infection and its association with short- and long-term clinical outcomes in NSTEMI patients undergoing PCI.

## Methods

### Study design and patients

This observational cohort study consisted of consecutive NSTEMI patients undergoing PCI from Jan 2010 to Dec 2014 at five hospitals in China. Only patients with adequate information to diagnose or rule out infection were included. Patients were

1  
2  
3 excluded if they were diagnosed with a malignant tumor before the index date, pregnant  
4 or presenting with cardiogenic shock. The method to search and identify appropriate  
5 NSTEMI-ACS patients has been outlined previously<sup>11</sup>. The study protocol was approved  
6 by the central ethics committee of the Guangdong Provincial People's Hospital, with a  
7 waiver of informed consent. The study was conducted in accordance with the  
8 Declaration of Helsinki.  
9

### 17 **Data collection and procedures**

10  
11  
12  
13  
14  
15  
16  
17  
18  
19  
20  
21  
22  
23  
24  
25  
26  
27  
28  
29  
30  
31  
32  
33  
34  
35  
36  
37  
38  
39  
40  
41  
42  
43  
44  
45  
46  
47  
48  
49  
50  
51  
52  
53  
54  
55  
56  
57  
58  
59  
60  
Data on demographics, patient history, laboratory tests, examinations, and medication  
history were collected by investigators in the first interview after admission. The  
medicines and PCI procedures were applied according to international guidelines and  
clinical evidence<sup>12</sup>.

Infection during the index hospitalization was diagnosed according to the presence  
of any symptoms, signs and/or laboratory indicating infection. Once confirmed by the  
infection control doctors service, appropriate antibiotics were prescribed<sup>8</sup>. Infection  
was classified as pulmonary, urinary tract infection (UTI) or others (including non-  
pulmonary/ non-urinary sepsis and cellulitis), based on the clinical records during  
hospitalization. Community-acquired pulmonary infection was defined by a diagnosis  
of infection within the first 72 hours of hospital admission, and hospital-acquired  
pulmonary infection was defined as those occurring after the first 72 hours and were  
diagnosed in accordance with the criteria established by the Centers for Disease Control  
and Prevention<sup>13</sup>.

### 57 **Clinical outcomes and follow up**

The primary outcome was in-hospital all-cause death and in-hospital major bleeding as

1  
2  
3  
4 defined by the Bleeding Academic Research Consortium definition (grades 3-5)<sup>14</sup>.

5  
6 Secondary outcomes were: (1) major adverse clinical events (MACE), consisting of all-  
7  
8 cause death, myocardial infarction, or major bleeding during hospitalization; and (2)  
9  
10 all-cause death or major bleeding during follow-up.  
11  
12

13  
14 All patients were followed-up by trained nurses via telephone interview or clinic  
15  
16 visits from Nov 2015 to Dec 2016. Relevant information was also collected from the  
17  
18 residence registration system and from the clinical records of the patients who were  
19  
20 readmitted. The details of clinical events and follow-up have been previously  
21  
22 described<sup>11</sup>. All adverse clinical events were evaluated by an independent clinical  
23  
24 events committee that was masked to the infection details.  
25  
26  
27  
28

### 29 30 **Statistical analysis**

31  
32 All patients were divided into groups with or without infections. Continuous variables  
33  
34 with a normal distribution are presented as the mean  $\pm$  SD, and those with an  
35  
36 asymmetric distribution are presented as the median and interquartile range (Q25-Q75).  
37  
38 Student's t test or Wilcoxon rank-sum test were used to compare the continuous  
39  
40 variables. Categorical variables are presented as frequencies and were compared by the  
41  
42 Fisher exact test or chi-square test. Univariate and multivariable analyses were  
43  
44 performed to evaluate the relationship between infection and clinical outcomes.  
45  
46 Variables that were significant in the univariate analysis or clinically important were  
47  
48 included in the multivariable models. Considering the low incidence of adverse  
49  
50 outcomes but potential high incidence of confounders, two models were developed for  
51  
52 each multivariable analysis. The first model (model 1) included infection, anemia,  
53  
54  
55  
56  
57  
58  
59  
60

1  
2  
3  
4 type of disease (unstable angina and non-ST-elevation acute myocardial infarction),  
5  
6 gender, current smokers, heart failure, and estimate glomerular filtration rate (eGFR).  
7  
8  
9 The second model (model 2) included radial access, cardiac biomarker positive, time  
10  
11 to procedure, treated multi-vessel, diabetes mellitus, hypertension, prior myocardial  
12  
13 infarction, and prior stroke. We performed subgroup analyses by older age, gender,  
14  
15 current smokers, diabetes mellitus, types of disease, heart failure, anemia and chronic  
16  
17 kidney disease. Analysis based on different types of infections was reported. We also  
18  
19 introduced the GRACE (Global Registry of Acute Coronary Events)<sup>15</sup> and CRUSADE  
20  
21 (Can Rapid Risk Stratification of Unstable Angina Patients Suppress Adverse  
22  
23 Outcomes With Early Implementation of the ACC/AHA Guidelines) score<sup>16</sup> and  
24  
25 compared the infection outcomes among different GRACE or CRUSADE risk groups  
26  
27 (low, medium, or high risk). All data analyses were performed with SAS (version 9.4,  
28  
29 SAS Institute, 210 Cary, North Carolina, USA). A two-sided  $P < 0.05$  was considered  
30  
31 significant.  
32  
33  
34  
35  
36  
37  
38  
39

40 Propensity score analyses were conducted to test the robustness of the results. All  
41  
42 factors listed in **Table 1** were considered in the propensity score model development.  
43  
44  
45 The heterogeneity analysis between the centers was conducted using meta-analysis  
46  
47 methods.  
48  
49

### 50 **Patient and public involvement**

51  
52  
53 There was no patient or public involvement in any step of this study.  
54  
55

### 56 **Results**

#### 57 **Baseline characteristic**

58  
59  
60

1  
2  
3  
4 From January 1, 2010, to December 31, 2014, a total of 8197 consecutive NSTEMI-ACS  
5  
6 patients underwent PCI at the 5 hospitals in China. Of the 5215 patients who met the  
7  
8 final criteria, 206 (3.95%) received a diagnosis of infection, and 183 (89%) of them  
9  
10 occurred within one week after hospital admission (**Figure S1**). **Table 1** shows the  
11  
12 baseline characteristics of patients with and without infection. The patients with  
13  
14 infection were older and had a low body weight. These patients were more likely to  
15  
16 have a history of myocardial infarction, stroke, hypertension and diabetes, and more  
17  
18 often had a diagnosis of heart failure, anemia and the use of intra-aortic balloon pump  
19  
20 and dual antiplatelet therapy. Patients with infection had lower left ventricular ejection  
21  
22 fraction, eGFR but higher GRACE risk scores compared with those without infection.  
23  
24 However, the CRUSADE risk score was similar between the two groups.  
25  
26  
27  
28  
29  
30  
31  
32

### 33 **In-hospital clinical outcomes**

34  
35 Patients with infection had a higher rate of in-hospital all-cause death (4.4% vs. 0.2%),  
36  
37 major bleeding (16.5% vs. 1.2%), and MACE (21.4% vs. 1.7%) compared with patients  
38  
39 without infection (all  $P < .001$ ) (**Table 2**). However, the rate of in-hospital myocardial  
40  
41 infarction was similar between the two groups ( $P = 0.726$ ).  
42  
43  
44

45  
46 Univariable analyses showed that infection was a predictor for in-hospital all cause  
47  
48 death (odds ratios [OR] 22.96; 95% confidence interval [CI], 9.23-57.14,  $P < .001$ ),  
49  
50 major bleeding (OR, 16.30; 95% CI, 10.42-25.50;  $P < .001$ ), and MACE (OR, 14.48;  
51  
52 95%CI, 9.62-21.78;  $P < .001$ ). After adjusting for other confounding variables,  
53  
54 multivariable logistic regression showed that infection was significantly and  
55  
56 independently related to the risk of the above outcomes (**Figure 1**).  
57  
58  
59  
60



### Long-term clinical outcomes

At a median follow-up of 3.2 years, Kaplan-Meier analysis revealed that patients with in-hospital infection had a higher risk of long-term death, major bleeding, and death or major bleeding compared with those without in-hospital infection ( $P<.001$ ) (**Table 2, Figure 2 and Figure S2**). Multivariable cox analyses demonstrated that infection was independently associated with long-term adverse outcomes even after adjusting for other potential risk factors (all cause death: hazard ratio [HR], 2.03; 95% CI, 1.52-2.71;  $P<.001$ ; major bleeding: HR, 5.31; 95% CI, 3.49-8.08;  $P<.001$ ; death or major bleeding: HR, 2.47; 95% CI, 1.92-3.19;  $P<.001$ ). The similar result was reported in the other adjusted model (**Figure 1**).

### Subgroup analyses

Subgroup analyses similarly revealed that infection was independently related to the in-hospital events (all-cause death, major bleeding, or MACE) according to different clinical status. The unadjusted and adjusted ORs for infection are presented in **Figure S3, Figure S4, and Figure S5**. Analysis according to the infection subtypes indicated that pulmonary infection other than UTI was independently associated with poor in-hospital and follow up clinical outcomes. However, the UTI was independently associated with all-cause death (**Table S1**).

### Propensity Score Analyses

We matched 740 patients with or without infection in a 1:4 ratio (**Table S2 and Figure S6**). The result showed a higher rate of major bleeding during the hospital stay (OR, 18; 95%CI, 2.40-134.8,  $P=0.015$ ), and a similar result was found at follow-up (HR,

1  
2  
3  
4 5.33;95%CI, 1.55-18.30, P=0.007), but matched results showed an absence of a  
5  
6 significant difference in all-cause death (in-hospital: OR, 4.01; 95%CI, 0.25-64.30;  
7  
8 follow-up: OR, 2; 95%CI, 0.97-4.12)(Table S3).  
9  
10

## 11 **Discussion**

12  
13  
14 This study demonstrates that infection was uncommon in a contemporary cohort  
15  
16 of NSTEMI-ACS patients who underwent PCI. But still the in-hospital infection among  
17  
18 NSTEMI-ACS patients received PCI is significant associated with higher risk of in-  
19  
20 hospital and long-term clinical prognoses, such as all-cause death, major bleeding as  
21  
22 well as the MACE.  
23  
24  
25

26  
27 The prevalence of infection in our study is similar to those results for the STEMI  
28  
29 population. Data from 5,745 STEMI patients enrolled in the APEX-AMI trial  
30  
31 demonstrated that the prevalence of serious infection was 2.4%, and that infection was  
32  
33 associated with higher 90-day mortality (29%)<sup>9</sup>. Also, another study of 1,486 STEMI  
34  
35 patients reported the prevalence of serious infection at 3.9% and the 30-day mortality  
36  
37 was up to 53% in these patients<sup>8</sup>. The conclusions for these 2 studies paralleled our  
38  
39 conclusion: infection is uncommon but associated with worse clinical outcomes. A  
40  
41 recent retrospective cohort analyses of 174 octogenarians with ACS, for whom the  
42  
43 patients with infection had a higher in-hospital, 30-day and long-term mortality than  
44  
45 patients without infection<sup>10</sup>. However, that study was confined to patients older than 85  
46  
47 years who were admitted to the coronary care unit, the different ACS types were never  
48  
49 specified, and the relatively liberal use of bare metal stents does not conform with the  
50  
51 contemporary more liberal use of drug eluting stents<sup>17, 18</sup>.  
52  
53  
54  
55  
56  
57  
58  
59  
60

1  
2  
3  
4 To our acknowledge, this study is the first to demonstrate the role of infection on  
5  
6 patients with NSTEMI-ACS. Although the prevalence of infections was similar to the  
7  
8 previous studies of STEMI<sup>8, 9</sup>, the 30 and 90-day death rates were lower than those  
9  
10 studies. These low rates might be the result of patient characteristics of our study with  
11  
12 less patients requiring intra-aortic balloon pump support, mechanical ventilation and  
13  
14 transfusion. However, our conclusions paralleled: patients with infections were  
15  
16 associated with worse outcomes. This association remained consistent after the  
17  
18 adjustment of other important potential risk factors for outcomes such as radial access,  
19  
20 cardiac biomarker positive, time to revascularization, and treated multi-vessel.  
21  
22  
23  
24  
25

26  
27 Although infections had a negative impact on patients with NSTEMI-ACS, the  
28  
29 underlying pathophysiologic mechanism remains unclear. Corrales-Medina et al.<sup>19</sup>  
30  
31 suggested that infection increased the mortality of patients who underwent elective PCI  
32  
33 due to the change in plaques triggered by acute inflammatory reactions. Indeed,  
34  
35 infection has been implicated as a factor contributing to initiation, progression and  
36  
37 rupture of an atherosclerotic plaque<sup>20</sup>. Infectious vectors have been reported to induce  
38  
39 the expression of adhesion molecules such as heat shock protein 60 and monocyte  
40  
41 chemoattractant protein-1 on endothelial cells, which can activate the endothelium and  
42  
43 the formation of a lipid core<sup>21-24</sup>. Additionally, the SIXTUS study group<sup>25</sup> demonstrated  
44  
45 that platelet activation and TxB<sub>2</sub> overproduction are related to infections via Toll-like  
46  
47 receptor 4. Moreover, MODICA et al.<sup>26</sup> reported that aspirin non-responsiveness was  
48  
49 often observed in patients with pneumonia. Also, increased coagulation activity has  
50  
51 been observed in pneumonia<sup>3</sup>. Therefore, infection can activate platelets and the  
52  
53  
54  
55  
56  
57  
58  
59  
60

1  
2  
3  
4 coagulation system, which plays a critical role in deteriorating outcomes in patients  
5  
6 with ACS. In contrast to previous STEMI reports<sup>8, 9</sup>, we did not find a significant  
7  
8 association of infection with myocardial infarction due to the low incidence of  
9  
10 myocardial infarction in our study. However, our results were similar to previous  
11  
12 studies that reported major bleeding was more frequent in patients with infection.  
13  
14 Although the PLATelet inhibition and patient Outcomes (PLATO) trial demonstrated  
15  
16 that ticagrelor, a more potent and consistent platelet P2Y<sub>12</sub> inhibitor, was associated  
17  
18 with significantly fewer pulmonary infections and death related to infection than  
19  
20 clopidogrel, the incidence of bleeding in patients with infection in that study was not  
21  
22 reported<sup>4</sup>. Because of dysfunction of platelets and the coagulation system, patients with  
23  
24 infection might be at higher risk of ischemia and bleeding. Therefore, more attention  
25  
26 should be paid to patients with infection when antithrombotic therapy was determined.  
27  
28 Finally, infection can also result in worse outcomes for NSTEMI-ACS patients through  
29  
30 increasing catecholamines and potentially adverse hemodynamic effects, such as  
31  
32 coronary vasoconstriction and increased myocardial metabolic demands<sup>27</sup>.  
33  
34  
35  
36  
37  
38  
39  
40  
41  
42

43 Although UTI was associated to some degree with in-hospital all-cause death, it  
44  
45 was not associated with other worse outcomes. One reason why pulmonary infection is  
46  
47 related to these worse clinical outcomes, while UTI is not, could be the lower  
48  
49 prevalence of UTI comparing to pulmonary infection (0.3% vs. 2.6%). The prevalence  
50  
51 of UTI was lower in our study compared with STEMI patients (0.3% vs. 7%)<sup>8</sup>.  
52  
53 Therefore, when the population sample size was expanded, UTI would be similar to the  
54  
55 pulmonary infection related to the worse clinical outcomes.  
56  
57  
58  
59  
60

## Limitations

The study had several limitations. First, as a retrospective study a causal relationship between the infection and outcomes could not be determined. Second, despite adjustment for important confounders, we could not completely eliminate all the potential bias including selection bias. Third, although the infections were not centrally adjudicated, the infection was confirmed by the infection control services who were authorized to approve the use of antibiotic.

## Conclusions

Infection is an uncommon complication in patients with NSTEMI-ACS undergoing PCI but is nonetheless independently associated with worse in-hospital and long-term outcomes. Future studies are indicated to identify NSTEMI-ACS patients at risk of infection which could then contribute to targeted intervention, help direct care, reduce the incidence of subsequent adverse events, and thus optimize resource utilization.

## Acknowledgements

The authors appreciate the efforts of revising the manuscript, Scott J. Denardo, MD, Reid Heart Center/First Health of Carolinas Cardiac and Vascular Institute, Pinehurst, NC, USA. We thank the patients who participated in this trial and their relatives; the clinical and research teams; and the nursing teams in our hospital for their work on the study. Department of Cardiology, Guangdong Cardiovascular Institute, Guangdong Provincial Key Laboratory of Coronary Heart Disease Prevention, Guangdong Provincial People's Hospital, Guangdong Academic of Medical Sciences, Guangzhou 510100, China.(Danqing Yu; Jianfang Luo; Zhonghan Ni;Peixia Huo; Qiong Ren;

1  
2  
3  
4 Yanyan Zhong;Liyun Wang; Jianxia He; Ruijuan Xiao; Yuanling Li; Xinrong Liu; Hui  
5  
6 Wang; Mingyu Chen; Haiyan Xue;Xuxi Yang; Suqin Xie;). Department of Cardiology,  
7  
8  
9 The Second People's Hospital of Nanhai District, Guangdong General Hospital's  
10  
11 Nanhai Hospital, Foshan, 528251, China (Wenfei He).

### 14 **Funding**

16  
17 This study was supported by a grant from the Outstanding Young Talent Program of  
18  
19 Guangdong Provincial People's Hospital (grant number: KJ012019084), National  
20  
21 Science Foundation for Young Scientists of China (Grant No. 81800325) and Science  
22  
23 and Technology Planning Project of Guangzhou City (201906010089, 201707010002),  
24  
25 and China Youth Research Funding (2017-CCA-VG-02). The funders had no role in  
26  
27 the study design, data collection and analysis, the decision to publish, or the preparation  
28  
29 of the manuscript. The work was not funded by any industry sponsors. All authors  
30  
31 agreed to submit the manuscript for publication.

### 37 **Authors' contributions**

39  
40 P-C He designed and supervised the study; P-Y Chen, Y-H Liu, L Jiang, X-B Wei and  
41  
42 W Guo performed the study, and C-Y Duan analyzed the data; Y-H Liu and other  
43  
44 authors provided the samples and demographics from patients and controls; Y-H Liu  
45  
46 and P-Y Chen wrote the manuscript; N Tan, J-Y Chen and P-C He revised the  
47  
48 manuscript for important intellectual content.

### 53 **Conflict of Interest**

55  
56 The authors declared no potential conflicts of interest with respect to the research,  
57  
58 authorship, and/or publication of this article.

### **Ethics approval and consent to participate**

The study protocol was approved by the central ethics committee of the Guangdong Provincial People's Hospital (NO. GDREC2016210H(R1)). Patients were included with a waiver of informed consent.

This article does not contain any studies with animals performed by any of the authors.

### **Data availability statement**

Data source for this study is a retrospective public health database with data which all hospitalizations that were already anonymized. Data were confidentially stored once the original study published according to the original protocol, but data are available upon reasonable request.

### **Open access**

This is an open access article distributed in accordance with the Creative Commons Attribution Non Commercial (CC BY-NC 4.0) license, which permits others to distribute, remix, adapt, build upon this work non-commercially, and license their derivative works on different terms, provided the original work is properly cited, appropriate credit is given, any changes made indicated, and the use is non-commercial.

---

## References

1. Benjamin EJ, Muntner P, Alonso A, Bittencourt MS, Callaway CW, Carson AP, et al. Heart Disease and Stroke Statistics-2019 Update. *Circulation*. 2019;139(10):e56-e528.
2. Morici N, Savonitto S, Ferri L A, Grosseto D, Bossi I, Sganzerla P, et al. Outcomes of Elderly Patients with ST-Elevation or Non-ST-Elevation Acute Coronary Syndrome Undergoing Percutaneous Coronary Intervention[J]. *The American Journal of Medicine*. 2019; 132(2): 209-216.
3. Milbrandt EB, Reade MC, Lee M, Shook SL, Angus DC, Kong L, et al. Prevalence and significance of coagulation abnormalities in community-acquired pneumonia. *Mol Med*. 2009;15(11-12):438-445.
4. Varenhorst C, Alstrom U, Braun OO, Storey RF, Mahaffey KW, Bertilsson M, et al. Causes of mortality with ticagrelor compared with clopidogrel in acute coronary syndromes. *Heart*. 2014;100(22):1762-1769.
5. Rizos M, Falagas ME, Tsiodras S, Betsou A, Foukas P, Michalopoulos A. Usual interstitial pneumonia associated with cytomegalovirus infection after percutaneous transluminal coronary angioplasty. *Eur J Clin Microbiol*. 2004;23(11):848-850.
6. Alfonso F. Fatal infection after rapamycin eluting coronary stent implantation. *Heart*. 2005;91(6):e51.
7. Ziakas A, Konstantinou V, Giannoglou G, Gemitzis K, Louridas G. Enoxaparin-induced psoas hematoma complicated by *Staphylococcus aureus* infection after cardiac catheterization. *Thromb Res*. 2006;118(4):535-537.



- 
- 1  
2  
3  
4 **8.**Piccaro DOP, Gonzales V, Lopes RD, Schmidt MM, Garofallo S, Santos RP, et al.  
5  
6 Serious infections among unselected patients with ST-elevation myocardial infarction  
7  
8 treated with contemporary primary percutaneous coronary intervention. *Am Heart J.*  
9  
10 2016;181:52-59.  
11  
12
- 13  
14 **9.**Truffa AA, Granger CB, White KR, Newby LK, Mehta RH, Hochman JS, et al.  
15  
16 Serious infection after acute myocardial infarction: incidence, clinical features, and  
17  
18 outcomes. *JACC Cardiovasc Interv.* 2012;5(7):769-776.  
19  
20
- 21  
22 **10.**Keskin K, Çetinkal G, Sığırcı S, Yıldız SS, Çetin Ş, Gürdal A, et al. The impact of  
23  
24 infection on mortality in octogenarians who were admitted due to acute coronary  
25  
26 syndrome. *Arch Gerontol Geriat.* 2018;76:48-53.  
27  
28
- 29  
30 **11.**Chen J, He P, Liu Y, Wei X, Jiang L, Guo W, et al. Association of Parenteral  
31  
32 Anticoagulation Therapy With Outcomes in Chinese Patients Undergoing Percutaneous  
33  
34 Coronary Intervention for Non–ST-Segment Elevation Acute Coronary Syndrome.  
35  
36 *JAMA Intern Med.* 2019;179(2):186.  
37  
38
- 39  
40 **12.**Roffi M, Patrono C, Collet J, Mueller C, Valgimigli M, Andreotti F, et al. 2015 ESC  
41  
42 Guidelines for the management of acute coronary syndromes in patients presenting  
43  
44 without persistent ST-segment elevation. *Eur Heart J.* 2016;37(3):267-315.  
45  
46
- 47  
48 **13.** CDC-Center for Disease Control and Prevention. Identifying health care associated  
49  
50 infections (HAI) for NHSN surveillance. Vol 2015:1-14.  
51  
52
- 53  
54 **14.**Ndrepepa G, Schuster T, Hadamitzky M, Byrne RA, Mehilli J, Neumann FJ, et al.  
55  
56 Validation of the Bleeding Academic Research Consortium definition of bleeding in  
57  
58 patients with coronary artery disease undergoing percutaneous coronary intervention.  
59  
60

1  
2  
3  
4 *Circulation*. 2012;125(11):1424-1431.

5  
6 **15.**Granger CB, Goldberg RJ, Dabbous O, Pieper KS, Eagle KA, Cannon CP, et al.  
7  
8 Predictors of hospital mortality in the global registry of acute coronary events. *Arch*  
9  
10  
11  
12 *Intern Med*. 2003;163 (19):2345-2353.

13  
14 **16.**Subherwal S, Bach RG, Chen AY, Gage BF, Rao SV, Newby LK, et al. Baseline  
15  
16 risk of major bleeding in non-ST-segment-elevation myocardial infarction: the  
17  
18 CRUSADE (Can Rapid risk stratification of Unstable angina patients Suppress  
19  
20  
21  
22  
23  
24  
25  
26  
27  
28  
29  
30  
31  
32  
33  
34  
35  
36  
37  
38  
39  
40  
41  
42  
43  
44  
45  
46  
47  
48  
49  
50  
51  
52  
53  
54  
55  
56  
57  
58  
59  
60  
ADverse outcomes with Early implementation of the ACC/AHA Guidelines) Bleeding  
Score. *Circulation*. 2009;119(14):1873-1882.

**17.**Palmerini T, Genereux P, Caixeta A, Cristea E, Lansky A, Mehran R, et al.  
Prognostic value of the SYNTAX score in patients with acute coronary syndromes  
undergoing percutaneous coronary intervention: analysis from the ACUITY (Acute  
Catheterization and Urgent Intervention Triage Strategy) trial. *J Am Coll Cardiol*.  
2011;57(24):2389-2397.

**18.**Sabate M, Brugaletta S, Cequier A, Iniguez A, Serra A, Jimenez-Quevedo P, et al.  
Clinical outcomes in patients with ST-segment elevation myocardial infarction treated  
with everolimus-eluting stents versus bare-metal stents (EXAMINATION): 5-year  
results of a randomised trial. *Lancet*. 2016;387(10016):357-366.

**19.**Corrales-Medina VF, Musher DM, Shachkina S, Chirinos JA. Acute pneumonia and  
the cardiovascular system. *Lancet*. 2013;381(9865):496-505.

**20.**Pothineni NVK, Subramany S, Kuriakose K, Shirazi LF, Romeo F, Shah PK, et al.  
Infections, atherosclerosis, and coronary heart disease. *Eur Heart J*. 2017;38(43): 3195-

1  
2  
3  
4 3201.  
5

6 **21.**Hsu YC, Lin JT, Ho HJ, Kao YH, Huang YT, Hsiao NW, et al. Antiviral treatment  
7 for hepatitis C virus infection is associated with improved renal and cardiovascular  
8 outcomes in diabetic patients. *Hepatology*. 2014;59(4):1293-1302.  
9

10 **22.**Huang CY, Shih CM, Tsao NW, Lin YW, Shih CC, Chiang KH, et al. The GroEL  
11 protein of *Porphyromonas gingivalis* regulates atherogenic phenomena in endothelial  
12 cells mediated by upregulating toll-like receptor 4 expression. *Am J Transl Res*.  
13 2016;8(2):384-404.  
14

15 **23.**Lei L, Li H, Yan F, Li Y, Xiao Y. *Porphyromonas gingivalis* lipopolysaccharide  
16 alters atherosclerotic-related gene expression in oxidized low-density-lipoprotein-  
17 induced macrophages and foam cells. *J Periodontal Res*. 2011;46(4):427-437.  
18

19 **24.**Park IW, Wang JF, Groopman JE. HIV-1 Tat promotes monocyte chemoattractant  
20 protein-1 secretion followed by transmigration of monocytes. *Blood*. 2001;97(2):352-  
21 358.  
22

23 **25.**Cangemi R, Casciaro M, Rossi E, Calvieri C, Bucci T, Calabrese CM, et al. Platelet  
24 activation is associated with myocardial infarction in patients with pneumonia. *J Am*  
25 *Coll Cardiol*. 2014;64(18):1917-1925.  
26

27 **26.**Modica A, Karlsson F, Mooe T, Fakulteten M, Medicin IFRF, Universitet U, et al..  
28 Platelet aggregation and aspirin non-responsiveness increase when an acute coronary  
29 syndrome is complicated by an infection. *J Thromb Haemost*.2007; 5(3):507-511.  
30

31 **27.** Corrales-Medina VF, Musher DM, Wells GA, Chirinos JA, Chen L, Fine MJ.  
32 Cardiac complications in patients with community-acquired pneumonia: incidence,  
33  
34  
35  
36  
37  
38  
39  
40  
41  
42  
43  
44  
45  
46  
47  
48  
49  
50  
51  
52  
53  
54  
55  
56  
57  
58  
59  
60

1  
2  
3  
4 timing, risk factors, and association with short-term mortality. *Circulation*. 2012;125  
5  
6 (6):773-781.  
7  
8  
9  
10  
11  
12  
13  
14  
15  
16  
17  
18  
19  
20  
21  
22  
23  
24  
25  
26  
27  
28  
29  
30  
31  
32  
33  
34  
35  
36  
37  
38  
39  
40  
41  
42  
43  
44  
45  
46  
47  
48  
49  
50  
51  
52  
53  
54  
55  
56  
57  
58  
59  
60

For peer review only

---

## Table legends

**Table 1.** The baseline characteristics at index hospitalization

**Table 2.** In-hospital and long-term clinical outcomes

**Table S1.** Univariate and multivariable logistic for clinical outcomes by stratifying infection subtype.

**Table S2** Propensity Score Analyses

**Table S3** Outcomes of Propensity Score Analyses

## Figure legends

**Figure 1.** Univariate and multivariable logistic or Cox analysis for clinical outcomes

**Figure 2.** Kaplan-Meier estimated event rates of all cause death (A) and major bleeding (B)

**Figure S1.** Time from hospital admission to the diagnosis of infection among all patients.

**Figure S2.** Kaplan-Meier estimated event rates of all cause death or major bleeding

**Figure S3.** Subgroup analysis of in-hospital all cause death

**Figure S4.** Subgroup analysis of in-hospital major bleeding

**Figure S5.** Subgroup analysis of in-hospital major adverse clinical events

**Figure S6.** Distributions of propensity scores between the two groups before and after matching (the first row is the density plots and the second row is the QQ plots)

**Table 1. The baseline characteristics at index hospitalization**

|                                                   | All patients*          |                     |                   | <i>P</i><br>value |
|---------------------------------------------------|------------------------|---------------------|-------------------|-------------------|
|                                                   | Uninfected<br>(N=5009) | Infected<br>(N=206) | Total<br>(N=5215) |                   |
| <b>Demographics</b>                               |                        |                     |                   |                   |
| Age, y                                            | 63.61 ± 10.30          | 70.86 ± 9.20        | 63.90 ± 10.36     | <.001             |
| Age ≥ 65 y                                        | 2380(47.5%)            | 157(76.2%)          | 2537(48.6%)       | <.001             |
| Female                                            | 1229(24.5%)            | 54(26.2%)           | 1283(24.6%)       | 0.584             |
| Weight, kg                                        | 65.69 ± 11.67          | 63.55 ± 12.22       | 65.60 ± 11.70     | 0.011             |
| Heart rate, bpm                                   | 73.81 ± 10.91          | 77.75 ± 15.62       | 73.96 ± 11.16     | <.001             |
| Blood pressure, mmHg                              |                        |                     |                   |                   |
| Systolic                                          | 133.37 ± 19.03         | 136.60 ± 22.99      | 133.50 ± 19.21    | 0.049             |
| Diastolic                                         | 76.99 ± 11.27          | 75.81 ± 12.56       | 76.95 ± 11.32     | 0.188             |
| <b>Medical history and risk factors,<br/>n(%)</b> |                        |                     |                   |                   |
| Current Smoker                                    | 1306(26.1%)            | 53(25.7%)           | 1359(26.1%)       | 0.912             |
| Cardiac arrest                                    | 8(0.2%)                | 0(0.0%)             | 8(0.2%)           | 0.566             |
| Myocardial Infarction                             | 784(15.7%)             | 53(25.7%)           | 837(16.0%)        | <.001             |
| Percutaneous coronary intervention                | 940(18.8%)             | 35(17.0%)           | 975(18.7%)        | 0.522             |
| Coronary-artery bypass surgery                    | 70(1.4%)               | 5(2.4%)             | 75(1.4%)          | 0.224             |
| Stroke                                            | 302(6.0%)              | 23(11.2%)           | 325(6.2%)         | 0.003             |
| Atrial Fibrillation                               | 125(2.5%)              | 8(3.9%)             | 133(2.6%)         | 0.216             |
| Hypertension                                      | 3259(65.1%)            | 157(76.2%)          | 3416(65.5%)       | <.001             |
| Diabetes mellitus                                 | 1509(30.1%)            | 96(46.6%)           | 1605(30.8%)       | <.001             |
| <b>Presentation characteristics</b>               |                        |                     |                   |                   |

|                                        | All patients*          |                     |                   | <i>P</i><br>value |
|----------------------------------------|------------------------|---------------------|-------------------|-------------------|
|                                        | Uninfected<br>(N=5009) | Infected<br>(N=206) | Total<br>(N=5215) |                   |
| IABP                                   | 44(0.9%)               | 30(14.6%)           | 74(1.4%)          | <.001             |
| CRUSAD                                 | 42.12 ± 12.04          | 40.66 ± 13.19       | 42.06 ± 12.09     | 0.097             |
| GRACE                                  | 124.54 ± 27.67         | 143.75 ± 29.82      | 125.17 ± 27.94    | <.001             |
| <b>Type of disease, n(%)</b>           |                        |                     |                   |                   |
| NSTEMI                                 | 3121(62.3%)            | 131(63.6%)          | 3252(62.4%)       | 0.709             |
| Unstable angina                        | 1888(37.7%)            | 75(36.4%)           | 1963(37.6%)       |                   |
| Heart Failure, n(%)                    | 489(9.8%)              | 66(32.0%)           | 555(10.6%)        | <.001             |
| LVEF, %                                | 61.79 ± 10.77          | 55.99 ± 13.71       | 61.54 ± 10.98     | <.001             |
| eGFR, mL/min/1.73m <sup>2</sup>        | 81.64 ± 24.99          | 60.85 ± 28.14       | 80.81 ± 25.45     | <.001             |
| eGFR ≤ 60, n(%)                        | 851(17.0%)             | 101(49.0%)          | 952(18.3%)        | <.001             |
| Serum creatinine, µmol/dL              | 1.05 ± 0.69            | 1.55 ± 1.28         | 1.07 ± 0.73       | <.001             |
| Hematocrit, g/L                        | 0.39 ± 0.05            | 0.35 ± 0.06         | 0.39 ± 0.05       | <.001             |
| Anemia, n(%)                           | 1605(32.0%)            | 127(61.7%)          | 1732(33.2%)       | <.001             |
| Cardiac biomarker positive, n(%)       | 2984(62.3%)            | 120(61.5%)          | 3104(62.2%)       | 0.836             |
| <b>In hospital medication, n(%)</b>    |                        |                     |                   |                   |
| Dual antiplatelet therapy              | 4845(96.7%)            | 194(94.2%)          | 5039(96.6%)       | 0.047             |
| Statin                                 | 4909(98.0%)            | 202(98.1%)          | 5074(97.3%)       | 0.956             |
| ACE inhibitor or ARB                   | 3939(78.6%)            | 170(82.5%)          | 4109(78.8%)       | 0.181             |
| Calcium-channel blocker                | 1066(21.3%)            | 72(35.0%)           | 1138(21.8%)       | <.001             |
| β-blocker                              | 4245(84.7%)            | 165(80.1%)          | 4410(84.6%)       | 0.070             |
| <b>Procedure characteristics, n(%)</b> |                        |                     |                   |                   |

|                         | All patients*          |                     |                   | <i>P</i><br>value |
|-------------------------|------------------------|---------------------|-------------------|-------------------|
|                         | Uninfected<br>(N=5009) | Infected<br>(N=206) | Total<br>(N=5215) |                   |
| Radial access           | 4470(89.2%)            | 154(74.8%)          | 4624(88.7%)       | <.001             |
| Coronary anatomy        |                        |                     |                   |                   |
| Any left main           | 690(13.8%)             | 49(23.8%)           | 739(14.2%)        | <.001             |
| Multi-vessel disease    | 3072(61.3%)            | 127(61.7%)          | 3199(61.3%)       |                   |
| Others                  | 1247(24.9%)            | 30(14.6%)           | 1277(24.5%)       |                   |
| Treated vessel          |                        |                     |                   |                   |
| Any left main           | 480(9.6%)              | 35(17.0%)           | 515(9.9%)         | 0.002             |
| Multi-vessel            | 1764(35.2%)            | 66(32.0%)           | 1830(35.1%)       | .                 |
| Others                  | 2765(55.2%)            | 105(51.0%)          | 2870(55.0%)       | .                 |
| Stent type              |                        |                     |                   |                   |
| Drug eluting stent      | 5004(99.9%)            | 206(100.0%)         | 5210(99.9%)       | 0.902             |
| Bare metal stent        | 2(0.0%)                | 0(0.0%)             | 2(0.0%)           | .                 |
| PTCA or aspiration only | 3(0.1%)                | 0(0.0%)             | 3(0.1%)           | .                 |
| Number of stents        | 2(1~3)                 | 2(1~3)              | 2(1~3)            | 0.048             |
| Total length of stents  | 45(27~71)              | 48 (31~76)          | 45(27~71)         | 0.053             |
| Thrombus aspiration     | 61(1.2%)               | 5(2.4%)             | 66(1.3%)          | 0.128             |
| Time to procedure       | 1(1~2)                 | 2(1~6)              | 1(1~2)            | <.001             |
| In 24 hours             | 2817(56.2%)            | 81(39.3%)           | 2898(55.6%)       | <.001             |
| 24~72 hours             | 1505(30.0%)            | 47(22.8%)           | 1552(29.8%)       | .                 |
| > 72 hours              | 687(13.7%)             | 78(37.9%)           | 765(14.7%)        | .                 |
| In-hospital days        | 4(3~6)                 | 11(7~18)            | 4(3~6)            | <.001             |

\*Abbreviations: IABP=intra-aortic balloon pump; GRACE=Global Registry of Acute



---

1  
2  
3  
4 Coronary Events; CRUSADE=Can Rapid Risk Stratification of Unstable Angina  
5  
6 Patients Suppress Adverse Outcomes With Early Implementation of the ACC/AHA  
7  
8 Guidelines; NSTEMI=Non-ST elevation myocardial infarction; LVEF=left ventricular  
9  
10 ejection fraction; eGFR=Estimate glomerular filtration rate; PTCA=Percutaneous  
11  
12 transluminal coronary angioplasty. ACE=angiotensin-converting enzyme;  
13  
14  
15  
16  
17 ARB=angiotensin receptor blocker.  
18  
19  
20  
21  
22  
23  
24  
25  
26  
27  
28  
29  
30  
31  
32  
33  
34  
35  
36  
37  
38  
39  
40  
41  
42  
43  
44  
45  
46  
47  
48  
49  
50  
51  
52  
53  
54  
55  
56  
57  
58  
59  
60

**Table 2 In-hospital and Long-term clinical outcomes**

| <b>Outcomes</b>                                  | <b>Uninfected<br/>(N=5009)</b> | <b>Infected<br/>(N=206)</b> | <b>P value</b> |
|--------------------------------------------------|--------------------------------|-----------------------------|----------------|
| <b>In-hospital outcomes</b>                      |                                |                             |                |
| Death*                                           | 10(0.2%)                       | 9(4.4%)                     | <.001          |
| Myocardial infarction                            | 17(0.3%)                       | 1(0.5%)                     | 0.726          |
| Death or myocardial infarction                   | 27(0.5%)                       | 10(4.9%)                    | <.001          |
| Major bleeding                                   | 62(1.2%)                       | 34(16.5%)                   | <.001          |
| Death or Myocardial infarction or major bleeding | 84(1.7%)                       | 44(21.4%)                   | <.001          |
| <b>Long-term outcomes</b>                        |                                |                             |                |
| <b>30 days</b>                                   |                                |                             |                |
| Death                                            | 17(0.3%)                       | 10(4.9%)                    | <.001          |
| Major bleeding                                   | 61(1.2%)                       | 31(15.0%)                   | <.001          |
| Death or major bleeding                          | 74(1.5%)                       | 37(18.0%)                   | <.001          |
| <b>One year</b>                                  |                                |                             |                |
| Death                                            | 93(1.9%)                       | 35(17.0%)                   | <.001          |
| Major bleeding                                   | 75(1.5%)                       | 34(16.5%)                   | <.001          |
| Death or major bleeding                          | 161(3.2%)                      | 56(27.2%)                   | <.001          |
| <b>Three years</b>                               |                                |                             |                |
| Death                                            | 346(6.9%)                      | 61(29.6%)                   | <.001          |
| Major bleeding                                   | 111(2.2%)                      | 36(17.5%)                   | <.001          |
| Death or major bleeding                          | 437(8.7%)                      | 81(39.3%)                   | <.001          |

\*All cause death;



Figure 1. Univariate and multivariable logistic or Cox analysis for clinical outcomes

423x225mm (300 x 300 DPI)

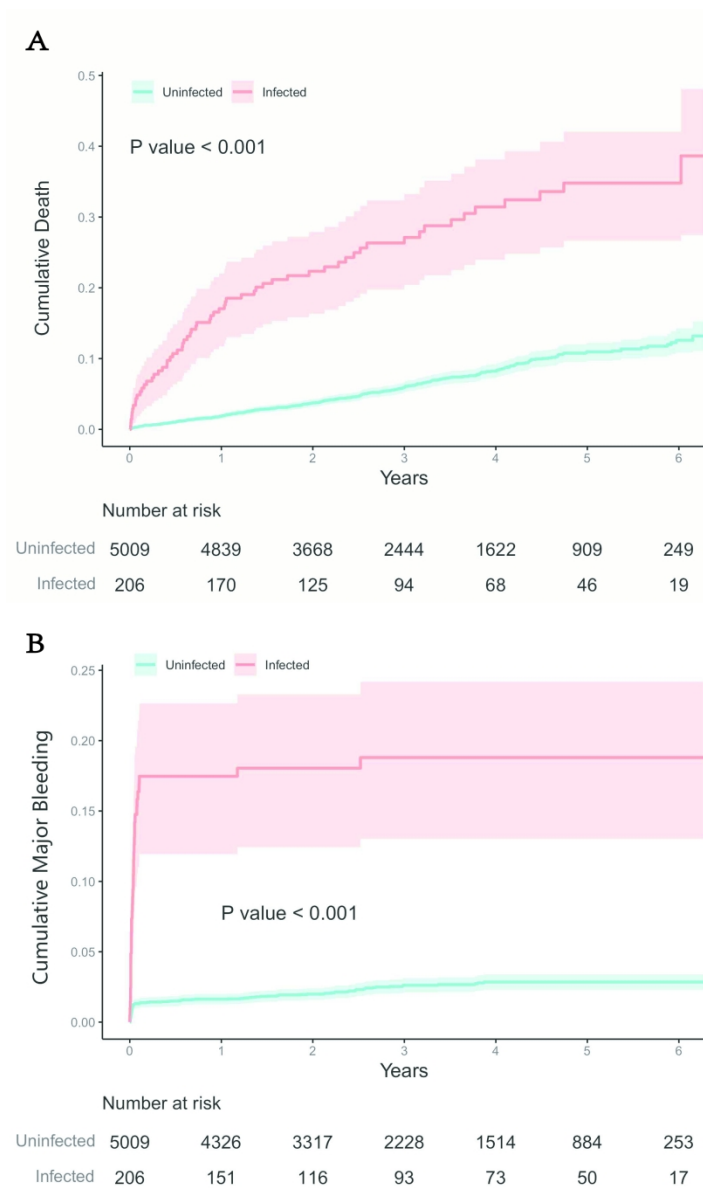

Figure 2. Kaplan-Meier estimated event rates of all cause death (A) and major bleeding (B)

1  
2  
3  
4  
5  
6  
7  
8  
9  
10  
11  
12  
13  
14  
15  
16  
17  
18  
19  
20  
21  
22  
23  
24  
25  
26  
27  
28  
29  
30  
31  
32  
33  
34  
35  
36  
37  
38  
39  
40  
41  
42  
43  
44  
45  
46  
47  
48  
49  
50  
51  
52  
53  
54  
55  
56  
57  
58  
59  
60

**Supplementary Appendix 1**

For peer review only

1  
2  
3  
4  
5 **Table S1.** Univariate and multivariable logistic for clinical outcomes by stratifying infection  
6  
7 subtype.  
8  
9

10 **Table S2** Propensity Score Analyses  
11  
12

13 **Table S3** Outcomes of Propensity Score Analyses  
14  
15

16 **Figure S1.** Time from hospital admission to the diagnosis of infection among all patients.  
17  
18

19 **Figure S2.** Kaplan-Meier estimated event rates of all cause death or major bleeding  
20  
21

22 **Figure S3.** Subgroup analysis of in-hospital all cause death  
23  
24

25 **Figure S4.** Subgroup analysis of in-hospital major bleeding  
26  
27

28 **Figure S5.** Subgroup analysis of in-hospital major adverse clinical events  
29  
30

31 **Figure S6.** Distributions of propensity scores between the two groups before and after matching  
32  
33 (the first row is the density plots and the second row is the QQ plots)  
34  
35  
36  
37  
38  
39  
40  
41  
42  
43  
44  
45  
46  
47  
48  
49  
50  
51  
52  
53  
54  
55  
56  
57  
58  
59  
60

**Table S1 Univariate and multivariable logistic for clinical outcomes by stratifying infection subtype.**

| Outcomes<br>(Compare with uninfected patients) | Univariate analysis |             |         | Multivariable analysis |             |        |
|------------------------------------------------|---------------------|-------------|---------|------------------------|-------------|--------|
|                                                | OR                  | 95%CI       | P value | OR                     | 95%CI       | Pvalue |
| <b>Model 1</b>                                 |                     |             |         |                        |             |        |
| <b>In hospital</b>                             |                     |             |         |                        |             |        |
| <b>Death</b>                                   |                     |             |         |                        |             |        |
| Community acquired pulmonary infections        | 17.24               | 4.66~63.73  | <.001   | 8.56                   | 2.06~35.57  | 0.003  |
| Hospital acquired pulmonary infections         | 23.25               | 4.95~109.28 | <.001   | 11.51                  | 2.15~61.49  | 0.004  |
| Urinary tract infection                        | 31.24               | 3.78~258.58 | 0.001   | 21.59                  | 2.32~200.48 | 0.007  |
| Other infection                                | 29.99               | 8.01~112.27 | <.001   | 23.14                  | 5.59~95.86  | <.001  |
| <b>Major Bleeding</b>                          |                     |             |         |                        |             |        |
| Community acquired pulmonary infections        | 28.32               | 16.54~48.48 | <.001   | 18.13                  | 9.92~33.16  | <.001  |
| Hospital acquired pulmonary infections         | 14.80               | 6.37~34.43  | <.001   | 9.04                   | 3.63~22.49  | <.001  |
| Urinary tract infection                        | 5.16                | 0.67~39.50  | 0.114   | 3.10                   | 0.39~24.51  | 0.283  |
| Other infection                                | 4.95                | 1.50~16.31  | 0.009   | 3.25                   | 0.95~11.13  | 0.061  |
| <b>Death or MI or Major Bleeding</b>           |                     |             |         |                        |             |        |
| Community acquired pulmonary infections        | 21.85               | 13.05~36.59 | <.001   | 14.23                  | 8.07~25.10  | <.001  |
| Hospital acquired pulmonary infections         | 16.69               | 8.01~34.77  | <.001   | 11.28                  | 5.14~24.76  | <.001  |
| Urinary tract infection                        | 3.76                | 0.49~28.65  | 0.202   | 2.44                   | 0.31~19.04  | 0.396  |
| Other infection                                | 6.26                | 2.43~16.13  | <.001   | 4.51                   | 1.69~12.01  | 0.003  |
| <b>Follow up</b>                               |                     |             |         |                        |             |        |
| <b>Death</b>                                   |                     |             |         |                        |             |        |
| Community acquired pulmonary infections        | 5.52                | 3.78~8.06   | <.001   | 2.06                   | 1.39~3.06   | <.001  |
| Hospital acquired pulmonary infections         | 6.16                | 3.78~10.02  | <.001   | 2.57                   | 1.56~4.24   | <.001  |
| Urinary tract infection                        | 3.66                | 1.37~9.82   | 0.010   | 2.38                   | 0.88~6.39   | 0.086  |
| Other infection                                | 2.62                | 1.44~4.79   | 0.002   | 1.45                   | 0.79~2.66   | 0.232  |
| <b>Major Bleeding</b>                          |                     |             |         |                        |             |        |
| Community acquired pulmonary infections        | 14.29               | 9.26~22.06  | <.001   | 8.86                   | 5.49~14.27  | <.001  |
| Hospital acquired pulmonary infections         | 7.08                | 3.30~15.20  | <.001   | 4.16                   | 1.87~9.27   | <.001  |

| Outcomes<br>(Compare with uninfected patients) | Univariate analysis |             |         | Multivariable analysis |             |        |
|------------------------------------------------|---------------------|-------------|---------|------------------------|-------------|--------|
|                                                | OR                  | 95%CI       | P value | OR                     | 95%CI       | Pvalue |
| Urinary tract infection                        | 2.54                | 0.35~18.13  | 0.354   | 1.66                   | 0.23~11.98  | 0.616  |
| Other infection                                | 2.49                | 0.79~7.83   | 0.119   | 1.83                   | 0.57~5.85   | 0.307  |
| <b>Death or Major Bleeding</b>                 |                     |             |         |                        |             |        |
| Community acquired pulmonary infections        | 6.83                | 4.99~9.35   | <.001   | 2.85                   | 2.05~3.97   | <.001  |
| Hospital acquired pulmonary infections         | 6.32                | 4.08~9.79   | <.001   | 2.93                   | 1.87~4.61   | <.001  |
| Urinary tract infection                        | 2.85                | 1.07~7.64   | 0.037   | 1.78                   | 0.66~4.78   | 0.253  |
| Other infection                                | 2.62                | 1.51~4.55   | 0.001   | 1.60                   | 0.92~2.80   | 0.099  |
| <b>Model 2</b>                                 |                     |             |         |                        |             |        |
| <b>In hospital</b>                             |                     |             |         |                        |             |        |
| <b>Death</b>                                   |                     |             |         |                        |             |        |
| Community acquired pulmonary infections        | 17.24               | 4.66~63.73  | <.001   | 2.01                   | 0.37~10.86  | 0.418  |
| Hospital acquired pulmonary infections         | 23.25               | 4.95~109.28 | <.001   | 6.48                   | 0.92~45.66  | 0.061  |
| Urinary tract infection                        | 31.24               | 3.78~258.58 | 0.001   | 14.68                  | 0.96~223.51 | 0.053  |
| Other infection                                | 29.99               | 8.01~112.27 | <.001   | 5.02                   | 0.98~25.62  | 0.052  |
| <b>Major Bleeding</b>                          |                     |             |         |                        |             |        |
| Community acquired pulmonary infections        | 28.32               | 16.54~48.48 | <.001   | 11.91                  | 6.10~23.28  | <.001  |
| Hospital acquired pulmonary infections         | 14.80               | 6.37~34.43  | <.001   | 7.47                   | 2.80~19.90  | <.001  |
| Urinary tract infection                        | 5.16                | 0.67~39.50  | 0.114   | 1.92                   | 0.15~25.23  | 0.619  |
| Other infection                                | 4.95                | 1.50~16.31  | 0.009   | 1.05                   | 0.26~4.23   | 0.942  |
| <b>Death or MI or Major Bleeding</b>           |                     |             |         |                        |             |        |
| Community acquired pulmonary infections        | 21.85               | 13.05~36.59 | <.001   | 9.69                   | 5.12~18.37  | <.001  |
| Hospital acquired pulmonary infections         | 16.69               | 8.01~34.77  | <.001   | 10.00                  | 4.33~23.12  | <.001  |
| Urinary tract infection                        | 3.76                | 0.49~28.65  | 0.202   | 1.59                   | 0.13~19.16  | 0.713  |
| Other infection                                | 6.26                | 2.43~16.13  | <.001   | 1.71                   | 0.54~5.35   | 0.360  |
| <b>Follow up</b>                               |                     |             |         |                        |             |        |
| <b>Death</b>                                   |                     |             |         |                        |             |        |
| Community acquired pulmonary infections        | 5.52                | 3.78~8.06   | <.001   | 2.70                   | 1.81~4.03   | <.001  |
| Hospital acquired pulmonary infections         | 6.16                | 3.78~10.02  | <.001   | 3.56                   | 2.15~5.90   | <.001  |
| Urinary tract infection                        | 3.66                | 1.37~9.82   | 0.010   | 2.90                   | 1.08~7.80   | 0.034  |



| Outcomes<br>(Compare with uninfected patients) | Univariate analysis |            |         | Multivariable analysis |            |        |
|------------------------------------------------|---------------------|------------|---------|------------------------|------------|--------|
|                                                | OR                  | 95%CI      | P value | OR                     | 95%CI      | Pvalue |
| Other infection                                | 2.62                | 1.44~4.79  | 0.002   | 1.32                   | 0.71~2.44  | 0.376  |
| <b>Major Bleeding</b>                          | 14.29               | 9.26~22.06 | <.001   | 6.30                   | 3.79~10.49 | <.001  |
| Community acquired pulmonary infections        | 7.08                | 3.30~15.20 | <.001   | 3.51                   | 1.57~7.84  | 0.002  |
| Hospital acquired pulmonary infections         | 2.54                | 0.35~18.13 | 0.354   | 1.42                   | 0.19~10.39 | 0.731  |
| Urinary tract infection                        | 2.49                | 0.79~7.83  | 0.119   | 1.01                   | 0.31~3.29  | 0.981  |
| Other infection                                |                     |            |         |                        |            |        |
| <b>Death or Major Bleeding</b>                 |                     |            |         |                        |            |        |
| Community acquired pulmonary infections        | 6.83                | 4.99~9.35  | <.001   | 3.55                   | 2.55~4.94  | <.001  |
| Hospital acquired pulmonary infections         | 6.32                | 4.08~9.79  | <.001   | 3.46                   | 2.20~5.45  | <.001  |
| Urinary tract infection                        | 2.85                | 1.07~7.64  | 0.037   | 1.96                   | 0.73~5.28  | 0.181  |
| Other infection                                | 2.62                | 1.51~4.55  | 0.001   | 1.38                   | 0.78~2.41  | 0.266  |

Model 1 included age, gender, current smokers, heart failure, anemia, type of disease, estimate glomerular filtration rate.

Model 2 included diabetes mellitus, hypertension, prior myocardial infarction, prior stroke, radial access, chronic kidney disease, intra-aortic balloon pump.

**Table S2 Propensity Score Analyses**

|                                               | Propensity Score Analyses |              |              |                |
|-----------------------------------------------|---------------------------|--------------|--------------|----------------|
|                                               | Uninfected                | Infected     | Total        | <i>P</i> value |
|                                               | (N=592)                   | (N=148)      | (N=740)      |                |
| <b>Demographics</b>                           |                           |              |              |                |
| Age, y                                        | 70.39±9.09                | 70.24±9.15   | 70.36±9.09   | 0.861          |
| Age ≥ 65 y                                    | 444(75.0%)                | 110(74.3%)   | 554(74.9%)   | 0.865          |
| Female                                        | 166(28.0%)                | 37(25.0%)    | 203(27.4%)   | 0.458          |
| Weight, kg                                    | 63.25±12.22               | 63.99±12.03  | 63.40±12.18  | 0.510          |
| Heart rate, bpm                               | 75.01±12.30               | 75.37±12.80  | 75.08±12.40  | 0.751          |
| <b>Blood pressure, mmHg</b>                   |                           |              |              |                |
| Systolic                                      | 137.48±21.34              | 137.12±21.66 | 137.41±21.39 | 0.854          |
| Diastolic                                     | 76.07±11.68               | 76.00±11.13  | 76.06±11.56  | 0.944          |
| <b>Medical history and risk factors, n(%)</b> |                           |              |              |                |
| Current Smoker                                | 157(26.5%)                | 41(27.7%)    | 198(26.8%)   | 0.771          |
| Myocardial Infarction                         | 126(21.3%)                | 29(19.6%)    | 155(20.9%)   | 0.651          |
| Percutaneous coronary intervention            | 100(16.9%)                | 25(16.9%)    | 125(16.9%)   | 1              |
| Coronary-artery bypass surgery                | 10(1.7%)                  | 4(2.7%)      | 14(1.9%)     | 0.418          |
| Stroke                                        | 36(6.1%)                  | 9(6.1%)      | 45(6.1%)     | 1              |
| Atrial Fibrillation                           | 19(3.2%)                  | 5(3.4%)      | 24(3.2%)     | 0.917          |
| Hypertension                                  | 445(75.2%)                | 111(75.0%)   | 556(75.1%)   | 0.966          |
| Diabetes mellitus                             | 248(41.9%)                | 67(45.3%)    | 315(42.6%)   | 0.457          |
| <b>Type of disease, n(%)</b>                  |                           |              |              |                |
| NSTEMI                                        | 225(38.0%)                | 60(40.5%)    | 285(38.5%)   | 0.571          |
| Unstable angina                               | 367(62.0%)                | 88(59.5%)    | 455(61.5%)   | NA             |
| Heart Failure, n(%)                           | 123(20.8%)                | 32(21.6%)    | 155(20.9%)   | 0.821          |

| <b>Propensity Score Analyses</b> |                   |                 |                |                       |
|----------------------------------|-------------------|-----------------|----------------|-----------------------|
|                                  | <b>Uninfected</b> | <b>Infected</b> | <b>Total</b>   | <b><i>P</i> value</b> |
|                                  | <b>(N=592)</b>    | <b>(N=148)</b>  | <b>(N=740)</b> |                       |
| LVEF, %                          | 59.67±12.02       | 57.81±13.16     | 59.29±12.28    | 0.118                 |
| eGFR, mL/min/1.73m <sup>2</sup>  | 65.65±26.10       | 66.66±28.13     | 65.85±26.50    | 0.678                 |
| eGFR ≤ 60, n(%)                  | 234(39.5%)        | 58(39.2%)       | 292(39.5%)     | 0.940                 |
| Serum creatinine, μmol/dL        | 1.39±1.16         | 1.43±1.32       | 1.40±1.19      | 0.726                 |
| Hematocrit, g/L                  | 0.36±0.05         | 0.37±0.05       | 0.36±0.05      | 0.690                 |
| Anemia, n(%)                     | 337(56.9%)        | 81(54.7%)       | 418(56.5%)     | 0.630                 |
| Cardiac biomarker positive, n(%) | 344(61.5%)        | 84(59.2%)       | 428(61.1%)     | 0.603                 |
| In hospital medication, n(%)     |                   |                 |                |                       |
| Dual antiplatelet therapy        | 558(94.3%)        | 138(93.2%)      | 696(94.1%)     | 0.641                 |
| Statin                           | 576(97.3%)        | 145(98.0%)      | 721(97.4%)     | 0.642                 |
| ACE inhibitor or ARB             | 487(82.3%)        | 123(83.1%)      | 610(82.4%)     | 0.809                 |
| Calcium-channel blocker          | 200(33.8%)        | 46(31.1%)       | 246(33.2%)     | 0.532                 |
| β-blocker                        | 488(82.4%)        | 120(81.1%)      | 608(82.2%)     | 0.701                 |
| Procedure characteristics, n(%)  |                   |                 |                |                       |
| Radial access                    | 486(82.1%)        | 116(78.4%)      | 602(81.4%)     | 0.299                 |
| Coronary anatomy                 |                   |                 |                |                       |
| Any left main                    | 117(19.8%)        | 26(17.6%)       | 143(19.3%)     | 0.786                 |
| Multi-vessel disease             | 363(61.3%)        | 95(64.2%)       | 458(61.9%)     |                       |
| Others                           | 112(18.9%)        | 27(18.2%)       | 139(18.8%)     |                       |
| Treated vessel                   |                   |                 |                |                       |
| Any left main                    | 77(13.0%)         | 17(11.5%)       | 94(12.7%)      | 0.708                 |
| Multi-vessel                     | 209(35.3%)        | 49(33.1%)       | 258(34.9%)     |                       |
| Others                           | 306(51.7%)        | 82(55.4%)       | 388(52.4%)     |                       |

---

**Propensity Score Analyses**


---

|                          | <b>Uninfected</b> | <b>Infected</b> | <b>Total</b>   | <b><i>P</i> value</b> |
|--------------------------|-------------------|-----------------|----------------|-----------------------|
|                          | <b>(N=592)</b>    | <b>(N=148)</b>  | <b>(N=740)</b> |                       |
| <b>Stent type</b>        |                   |                 |                |                       |
| Drug eluting stent       | 592(100.0%)       | 148(100.0%)     | 740(100.0%)    | 1                     |
| Number of stents         | 2.26±1.29         | 2.27±1.38       | 2.26±1.31      | 0.933                 |
| Total length of stents   | 56.48±35.90       | 58.22±38.71     | 56.83±36.46    | 0.604                 |
| Thrombus aspiration      | 16(2.7%)          | 3(2.0%)         | 19(2.6%)       | 0.642                 |
| <b>Time to procedure</b> |                   |                 |                |                       |
| In 24 hours              | 253(42.7%)        | 59(39.9%)       | 312(42.2%)     | 0.816                 |
| 24~72 hours              | 135(22.8%)        | 35(23.6%)       | 170(23.0%)     |                       |
| > 72 hours               | 204(34.5%)        | 54(36.5%)       | 258(34.9%)     |                       |

---

\*Abbreviations: NSTEMI=Non-ST elevation myocardial infarction; LVEF=left ventricular ejection fraction; eGFR=Estimate glomerular filtration rate; ACE=angiotensin-converting enzyme; ARB=angiotensin receptor blocker.

**Table S3 Outcomes of Propensity Score Analyses**

| <b>Outcomes</b>                     | <b>Logistics analysis</b> |              |                |
|-------------------------------------|---------------------------|--------------|----------------|
|                                     | <b>OR/HR</b>              | <b>95%CI</b> | <b>P value</b> |
| In-hospital Death                   | 4.01                      | 0.25~64.30   | 0.981          |
| In-hospital Major bleeding          | 18                        | 2.40~134.8   | 0.005          |
| In-hospital MI                      | 2.0                       | 0.18~22.20   | 0.57           |
| In-hospital Death or Major bleeding | 17.24                     | 4.66~63.73   | <.001          |
| Follow-up Death                     | 2                         | 0.97~4.12    | 0.06           |
| Follow-up Major bleeding            | 5.33                      | 1.55~18.30   | 0.007          |
| Follow-up Death or Major bleeding   | 2.46                      | 1.29~4.69    | 0.006          |

**Figure S1.** Time from hospital admission to the diagnosis of infection among all patients.

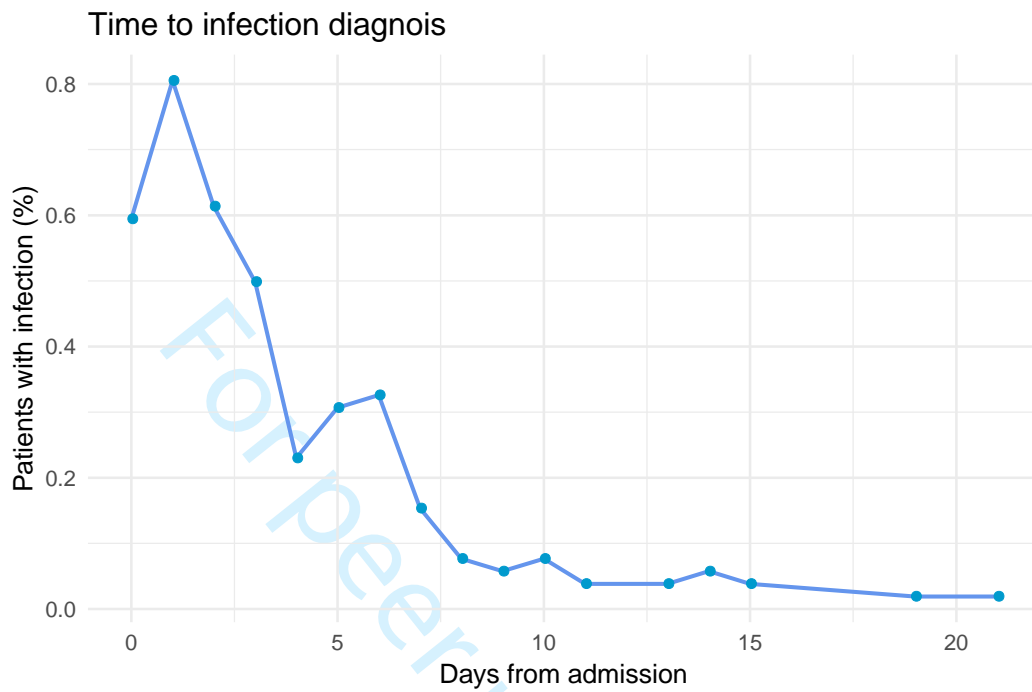

**Figure S2.** Kaplan-Meier estimated event rates of all cause death or major bleeding

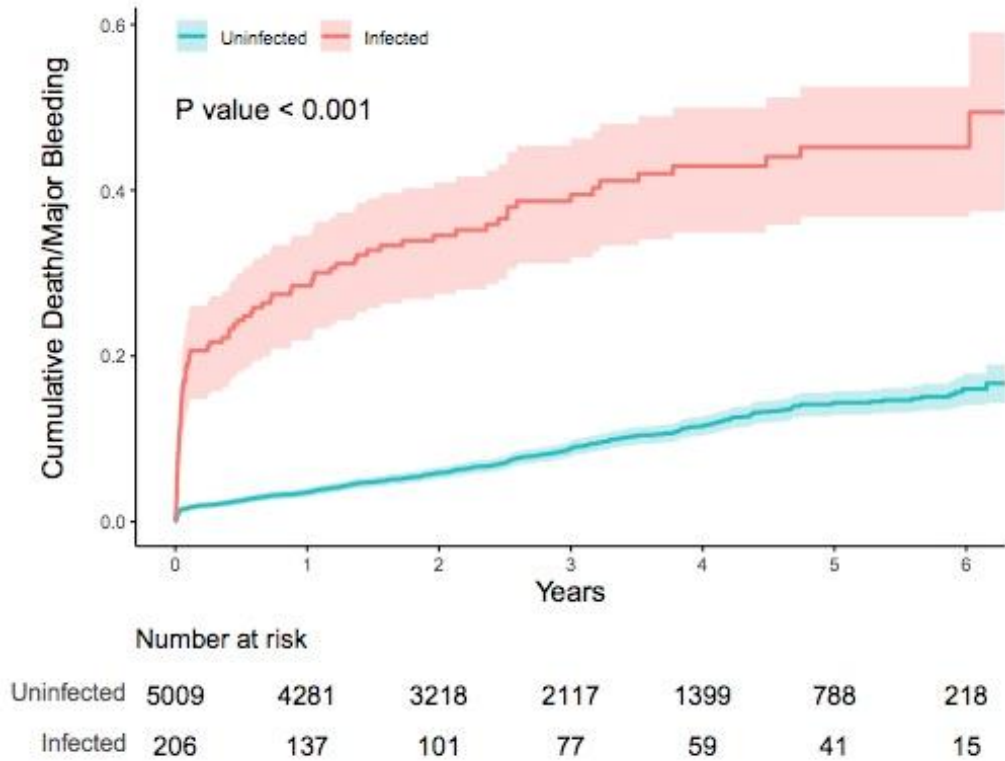

EW Only

Figure S3. Subgroup analysis of in-hospital all cause death

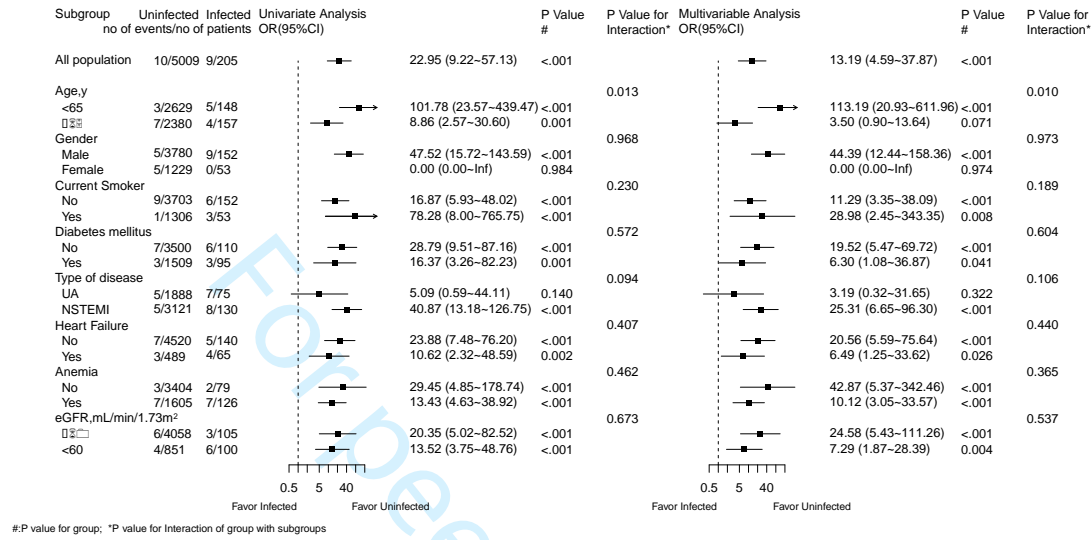



Figure S4. Subgroup analysis of in-hospital major bleeding

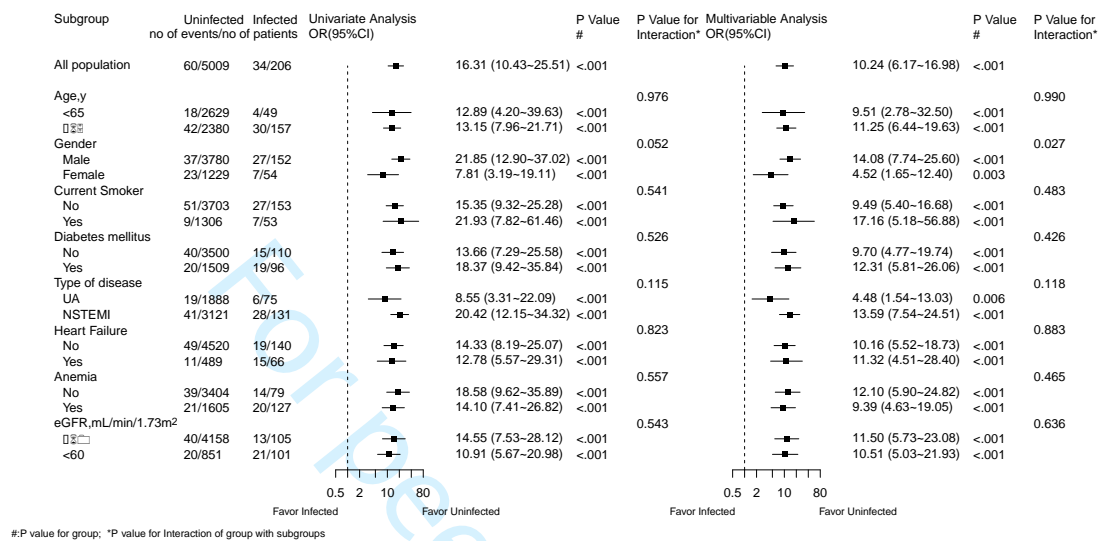

Figure S5. Subgroup analysis of in-hospital major adverse clinical events

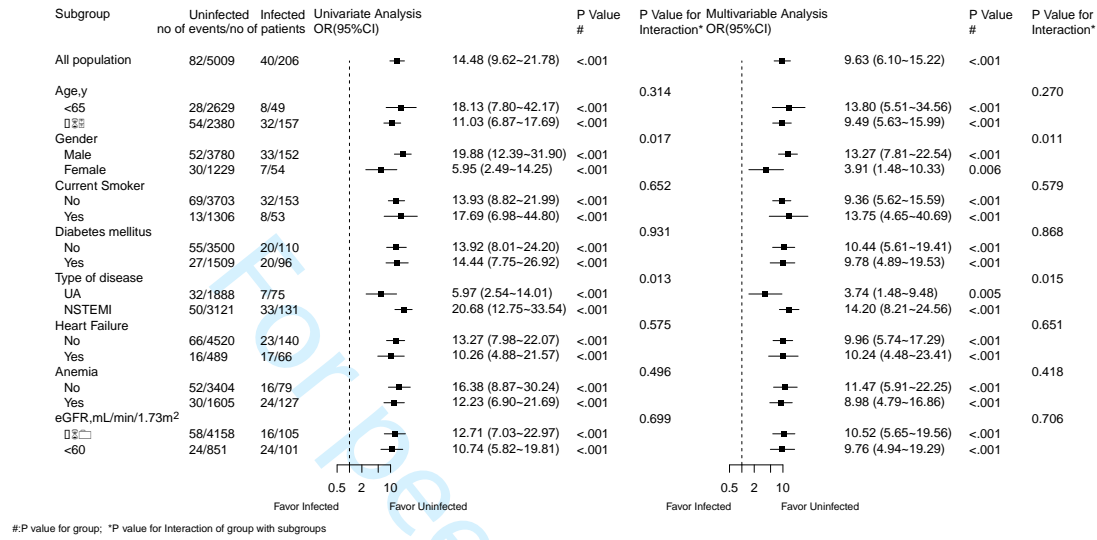

**Figure S6.** Distributions of propensity scores between the two groups before and after matching (the first row is the density plots and the second row is the QQ plots)

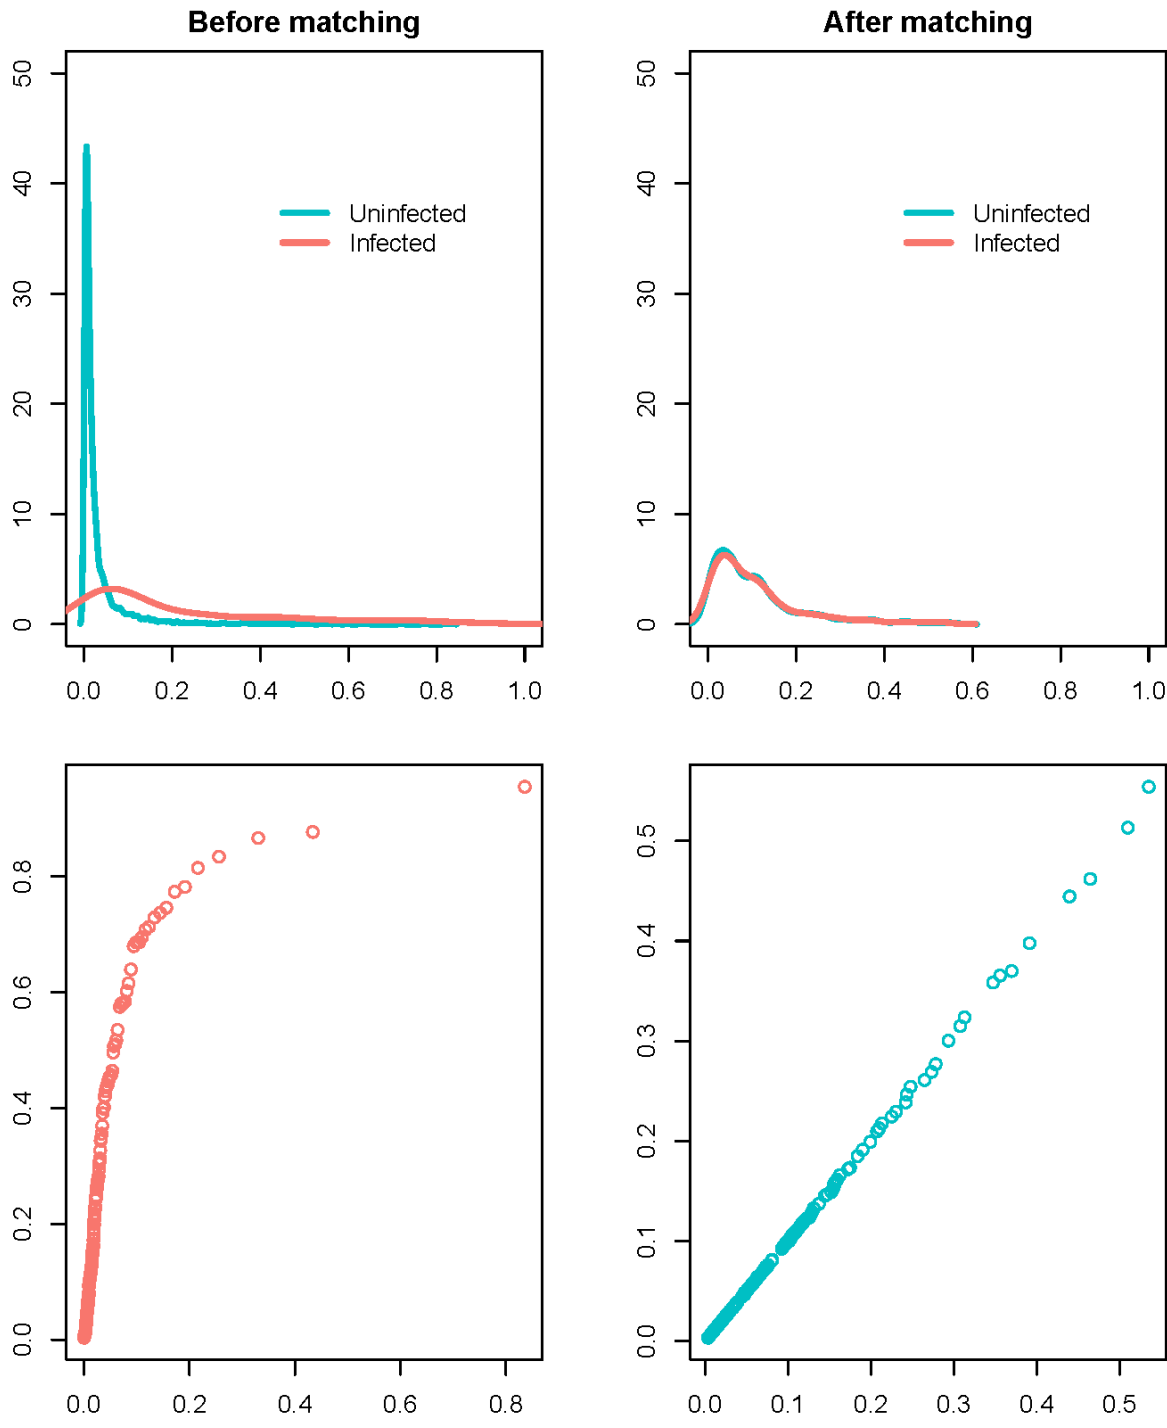

STROBE Statement—Checklist of items that should be included in reports of *cohort studies*

|                           | Item No | Recommendation                                                                                                                                                                                                                                                                                                         | Page No          |
|---------------------------|---------|------------------------------------------------------------------------------------------------------------------------------------------------------------------------------------------------------------------------------------------------------------------------------------------------------------------------|------------------|
| <b>Title and abstract</b> | 1       | (a) Indicate the study's design with a commonly used term in the title or the abstract<br>(b) Provide in the abstract an informative and balanced summary of what was done and what was found                                                                                                                          | 1<br>3-4         |
| <b>Introduction</b>       |         |                                                                                                                                                                                                                                                                                                                        |                  |
| Background/rationale      | 2       | Explain the scientific background and rationale for the investigation being reported                                                                                                                                                                                                                                   | 6                |
| Objectives                | 3       | State specific objectives, including any prespecified hypotheses                                                                                                                                                                                                                                                       | 6                |
| <b>Methods</b>            |         |                                                                                                                                                                                                                                                                                                                        |                  |
| Study design              | 4       | Present key elements of study design early in the paper                                                                                                                                                                                                                                                                | 7                |
| Setting                   | 5       | Describe the setting, locations, and relevant dates, including periods of recruitment, exposure, follow-up, and data collection                                                                                                                                                                                        | 7                |
| Participants              | 6       | (a) Give the eligibility criteria, and the sources and methods of selection of participants. Describe methods of follow-up<br>(b) For matched studies, give matching criteria and number of exposed and unexposed                                                                                                      | 7<br>NA          |
| Variables                 | 7       | Clearly define all outcomes, exposures, predictors, potential confounders, and effect modifiers. Give diagnostic criteria, if applicable                                                                                                                                                                               | 7-8 & supplement |
| Data sources/measurement  | 8*      | For each variable of interest, give sources of data and details of methods of assessment (measurement). Describe comparability of assessment methods if there is more than one group                                                                                                                                   | supplement       |
| Bias                      | 9       | Describe any efforts to address potential sources of bias                                                                                                                                                                                                                                                              | 8-9              |
| Study size                | 10      | Explain how the study size was arrived at                                                                                                                                                                                                                                                                              | 7                |
| Quantitative variables    | 11      | Explain how quantitative variables were handled in the analyses. If applicable, describe which groupings were chosen and why                                                                                                                                                                                           | 8                |
| Statistical methods       | 12      | (a) Describe all statistical methods, including those used to control for confounding<br>(b) Describe any methods used to examine subgroups and interactions<br>(c) Explain how missing data were addressed<br>(d) If applicable, explain how loss to follow-up was addressed<br>(e) Describe any sensitivity analyses | 8-9 & supplement |
| <b>Results</b>            |         |                                                                                                                                                                                                                                                                                                                        |                  |
| Participants              | 13*     | (a) Report numbers of individuals at each stage of study—eg numbers potentially eligible, examined for eligibility, confirmed eligible, included in the study, completing follow-up, and analysed<br>(b) Give reasons for non-participation at each stage<br>(c) Consider use of a flow diagram                        | 9-10             |
| Descriptive data          | 14*     | (a) Give characteristics of study participants (eg demographic, clinical, social) and information on exposures and potential confounders<br>(b) Indicate number of participants with missing data for each variable of interest<br>(c) Summarise follow-up time (eg, average and total amount)                         | 9-10             |

|    |                          |     |                                                                                           |                       |
|----|--------------------------|-----|-------------------------------------------------------------------------------------------|-----------------------|
| 1  | Outcome data             | 15* | Report numbers of outcome events or summary measures over time                            | 9-10                  |
| 2  | Main results             | 16  | (a) Give unadjusted estimates and, if applicable, confounder-adjusted estimates and       | 10-11 &<br>supplement |
| 3  |                          |     | their precision (eg, 95% confidence interval). Make clear which confounders were          |                       |
| 4  |                          |     | adjusted for and why they were included                                                   |                       |
| 5  |                          |     | (b) Report category boundaries when continuous variables were categorized                 |                       |
| 6  |                          |     | (c) If relevant, consider translating estimates of relative risk into absolute risk for a |                       |
| 7  |                          |     | meaningful time period                                                                    |                       |
| 8  | Other analyses           | 17  | Report other analyses done—eg analyses of subgroups and interactions, and                 | 11 &<br>supplement    |
| 9  |                          |     | sensitivity analyses                                                                      |                       |
| 10 | <b>Discussion</b>        |     |                                                                                           |                       |
| 11 | Key results              | 18  | Summarise key results with reference to study objectives                                  | 11-12                 |
| 12 | Limitations              | 19  | Discuss limitations of the study, taking into account sources of potential bias or        | 14                    |
| 13 |                          |     | imprecision. Discuss both direction and magnitude of any potential bias                   |                       |
| 14 | Interpretation           | 20  | Give a cautious overall interpretation of results considering objectives, limitations,    | 14-15                 |
| 15 |                          |     | multiplicity of analyses, results from similar studies, and other relevant evidence       |                       |
| 16 | Generalisability         | 21  | Discuss the generalisability (external validity) of the study results                     | 14-15                 |
| 17 | <b>Other information</b> |     |                                                                                           |                       |
| 18 | Funding                  | 22  | Give the source of funding and the role of the funders for the present study and, if      | 15-16                 |
| 19 |                          |     | applicable, for the original study on which the present article is based                  |                       |

\*Give information separately for exposed and unexposed groups.

**Note:** An Explanation and Elaboration article discusses each checklist item and gives methodological background and published examples of transparent reporting. The STROBE checklist is best used in conjunction with this article (freely available on the Web sites of PLoS Medicine at <http://www.plosmedicine.org/>, Annals of Internal Medicine at <http://www.annals.org/>, and Epidemiology at <http://www.epidem.com/>). Information on the STROBE Initiative is available at <http://www.strobe-statement.org>.

# BMJ Open

## Impact of infection for non-ST-elevation acute coronary syndrome patients undergoing percutaneous coronary intervention: insight from a multicentre observational cohort from China

|                                 |                                                                                                                                                                                                                                                                                                                                                                                                                                                                                                                                                                                                                                                                                                                                                                                                                                                                                                                                                                                                                                                                                                                                                                                                                                                                                                                                                                                                                                                                                                                                                                                                                                                                                                                                                                                                                                                                                           |
|---------------------------------|-------------------------------------------------------------------------------------------------------------------------------------------------------------------------------------------------------------------------------------------------------------------------------------------------------------------------------------------------------------------------------------------------------------------------------------------------------------------------------------------------------------------------------------------------------------------------------------------------------------------------------------------------------------------------------------------------------------------------------------------------------------------------------------------------------------------------------------------------------------------------------------------------------------------------------------------------------------------------------------------------------------------------------------------------------------------------------------------------------------------------------------------------------------------------------------------------------------------------------------------------------------------------------------------------------------------------------------------------------------------------------------------------------------------------------------------------------------------------------------------------------------------------------------------------------------------------------------------------------------------------------------------------------------------------------------------------------------------------------------------------------------------------------------------------------------------------------------------------------------------------------------------|
| Journal:                        | <i>BMJ Open</i>                                                                                                                                                                                                                                                                                                                                                                                                                                                                                                                                                                                                                                                                                                                                                                                                                                                                                                                                                                                                                                                                                                                                                                                                                                                                                                                                                                                                                                                                                                                                                                                                                                                                                                                                                                                                                                                                           |
| Manuscript ID                   | bmjopen-2020-038551.R2                                                                                                                                                                                                                                                                                                                                                                                                                                                                                                                                                                                                                                                                                                                                                                                                                                                                                                                                                                                                                                                                                                                                                                                                                                                                                                                                                                                                                                                                                                                                                                                                                                                                                                                                                                                                                                                                    |
| Article Type:                   | Original research                                                                                                                                                                                                                                                                                                                                                                                                                                                                                                                                                                                                                                                                                                                                                                                                                                                                                                                                                                                                                                                                                                                                                                                                                                                                                                                                                                                                                                                                                                                                                                                                                                                                                                                                                                                                                                                                         |
| Date Submitted by the Author:   | 07-Aug-2020                                                                                                                                                                                                                                                                                                                                                                                                                                                                                                                                                                                                                                                                                                                                                                                                                                                                                                                                                                                                                                                                                                                                                                                                                                                                                                                                                                                                                                                                                                                                                                                                                                                                                                                                                                                                                                                                               |
| Complete List of Authors:       | <p>Chen, Peng-yuan; Guangdong Provincial People's Hospital's Nanhai Hospital, Department of Cardiology</p> <p>Liu, Yuanhui; Guangdong Cardiovascular Institute, Guangdong Provincial Key Laboratory of Coronary Heart Disease Prevention, Guangdong Provincial People's Hospital, Guangdong Academy of Medical Sciences, Department of Cardiology; The Second School of Clinical Medicine, Southern Medical University, Guangzhou, 510515, China.</p> <p>Duan, Chongyang; School of Public Health, Southern Medical University, Guangzhou, Biostatistics</p> <p>Jiang, Lei; Guangdong Cardiovascular Institute, Guangdong Provincial Key Laboratory of Coronary Heart Disease Prevention, Guangdong Provincial People's Hospital, Guangdong Academy of Medical Sciences, Department of Cardiology</p> <p>Wei, Xuebiao; Guangdong Cardiovascular Institute, Guangdong Provincial Key Laboratory of Coronary Heart Disease Prevention, Guangdong Provincial People's Hospital, Guangdong Academy of Medical Sciences, Department of Cardiology</p> <p>Guo, Wei; Guangdong Cardiovascular Institute, Guangdong Provincial Key Laboratory of Coronary Heart Disease Prevention, Guangdong Provincial People's Hospital, Guangdong Academy of Medical Sciences, Department of Cardiology</p> <p>Chen, Jiyan; Guangdong Cardiovascular Institute, Guangdong Provincial Key Laboratory of Coronary Heart Disease Prevention, Guangdong Provincial People's Hospital, Guangdong Academy of Medical Sciences, Department of Cardiology</p> <p>Tan, Ning; Guangdong Cardiovascular Institute, Guangdong Provincial Key Laboratory of Coronary Heart Disease Prevention, Guangdong Provincial People's Hospital, Guangdong Academy of Medical Sciences, Department of Cardiology</p> <p>He, Pengcheng; Guangdong Cardiovascular Institute, Department of Cardiology; Southern Medical University</p> |
| <b>Primary Subject Heading</b>: | Cardiovascular medicine                                                                                                                                                                                                                                                                                                                                                                                                                                                                                                                                                                                                                                                                                                                                                                                                                                                                                                                                                                                                                                                                                                                                                                                                                                                                                                                                                                                                                                                                                                                                                                                                                                                                                                                                                                                                                                                                   |
| Secondary Subject Heading:      | Infectious diseases                                                                                                                                                                                                                                                                                                                                                                                                                                                                                                                                                                                                                                                                                                                                                                                                                                                                                                                                                                                                                                                                                                                                                                                                                                                                                                                                                                                                                                                                                                                                                                                                                                                                                                                                                                                                                                                                       |
| Keywords:                       | Coronary heart disease < CARDIOLOGY, Coronary intervention <                                                                                                                                                                                                                                                                                                                                                                                                                                                                                                                                                                                                                                                                                                                                                                                                                                                                                                                                                                                                                                                                                                                                                                                                                                                                                                                                                                                                                                                                                                                                                                                                                                                                                                                                                                                                                              |

1  
2  
3  
4  
5  
6  
7  
8  
9  
10  
11  
12  
13  
14  
15  
16  
17  
18  
19  
20  
21  
22  
23  
24  
25  
26  
27  
28  
29  
30  
31  
32  
33  
34  
35  
36  
37  
38  
39  
40  
41  
42  
43  
44  
45  
46  
47  
48  
49  
50  
51  
52  
53  
54  
55  
56  
57  
58  
59  
60

|  |                                            |
|--|--------------------------------------------|
|  | CARDIOLOGY, Cardiology < INTERNAL MEDICINE |
|  |                                            |

SCHOLARONE™  
Manuscripts



I, the Submitting Author has the right to grant and does grant on behalf of all authors of the Work (as defined in the below author licence), an exclusive licence and/or a non-exclusive licence for contributions from authors who are: i) UK Crown employees; ii) where BMJ has agreed a CC-BY licence shall apply, and/or iii) in accordance with the terms applicable for US Federal Government officers or employees acting as part of their official duties; on a worldwide, perpetual, irrevocable, royalty-free basis to BMJ Publishing Group Ltd ("BMJ") its licensees and where the relevant Journal is co-owned by BMJ to the co-owners of the Journal, to publish the Work in this journal and any other BMJ products and to exploit all rights, as set out in our [licence](#).

The Submitting Author accepts and understands that any supply made under these terms is made by BMJ to the Submitting Author unless you are acting as an employee on behalf of your employer or a postgraduate student of an affiliated institution which is paying any applicable article publishing charge ("APC") for Open Access articles. Where the Submitting Author wishes to make the Work available on an Open Access basis (and intends to pay the relevant APC), the terms of reuse of such Open Access shall be governed by a Creative Commons licence – details of these licences and which [Creative Commons](#) licence will apply to this Work are set out in our licence referred to above.

Other than as permitted in any relevant BMJ Author's Self Archiving Policies, I confirm this Work has not been accepted for publication elsewhere, is not being considered for publication elsewhere and does not duplicate material already published. I confirm all authors consent to publication of this Work and authorise the granting of this licence.



**Original article****Impact of infection for non-ST-elevation acute coronary syndrome patients undergoing percutaneous coronary intervention: insight from a multicentre observational cohort from China**

Pengyuan Chen<sup>1\*</sup>, MD; Yuanhui Liu<sup>2,3\*</sup>, MD, PhD; ChongYang Duan<sup>4\*</sup>, MD; Lei Jiang<sup>2</sup>, MD, PhD; XueBiao Wei<sup>2</sup>, MD; Wei Guo<sup>2</sup>, MD, PhD; JiYan Chen<sup>2</sup>, MD, PhD; Ning Tan<sup>2,3</sup>, MD, PhD; PengCheng He<sup>2,3</sup>, MD, PhD;

**Running Title:** Infection of NSTEMI-ACS and PCI

1. Department of Cardiology, Guangdong Provincial People's Hospital's Nanhai Hospital, the Second Hospital of Nanhai District Foshan City, Foshan 528000, China.
2. Department of Cardiology, Guangdong Cardiovascular Institute, Guangdong Provincial Key Laboratory of Coronary Heart Disease Prevention, Guangdong Provincial People's Hospital, Guangdong Academy of Medical Sciences, Guangzhou 510100, China.
3. The Second School of Clinical Medicine, Southern Medical University, Guangzhou, 510515, China.
4. Department of Biostatistics, School of Public Health, Southern Medical University, Guangzhou, 510515, China

\*These authors contributed equally to the work.

**Address for corresponding author:** PengCheng He; Department of Cardiology, Guangdong Cardiovascular Institute, Guangdong Provincial Key Laboratory of

1  
2  
3  
4 Coronary Heart Disease Prevention, Guangdong Provincial People's Hospital,  
5  
6 Guangdong Academy of Medical Sciences, Guangzhou 510100, China.  
7

8  
9 Tel: +86-20-83819161 Fax: +86-20-83824369; [gdhpc100@126.com](mailto:gdhpc100@126.com)  
10

11 **Words count:** 2333 words  
12  
13  
14  
15  
16  
17  
18  
19  
20  
21  
22  
23  
24  
25  
26  
27  
28  
29  
30  
31  
32  
33  
34  
35  
36  
37  
38  
39  
40  
41  
42  
43  
44  
45  
46  
47  
48  
49  
50  
51  
52  
53  
54  
55  
56  
57  
58  
59  
60

For peer review only

## Abstract

**Objectives:** we aimed to describe the association between in-hospital infection and the prognosis among non-ST-elevation acute coronary syndrome (NSTEMI-ACS) patients received percutaneous coronary intervention (PCI).

**Design:** This observational cohort originated from the database for NSTEMI-ACS underwent percutaneous coronary intervention from January 1, 2010, to December 31, 2014.

**Setting:** five centres from south China

**Participants:** This multicentre observational cohort study consecutively included 8197 NSTEMI-ACS patients who received PCI. Only patients with adequate information to diagnose or rule out infection were included. Patients were excluded if they were diagnosed with a malignant tumor, pregnant or cardiogenic shock at index date. Patients were grouped by whether they had in-hospital infection or not.

**Primary and secondary outcome measures:** The primary outcome was all-cause death and major bleeding during hospitalization. The secondary outcomes included all-cause death and major bleeding during follow-up and in-hospital myocardial infarction.

**Results:** Of the 5215 patients, 206 (3.95%) occurred infection. Patients with infection had a higher rate of in-hospital all-cause death and major bleeding (4.4% vs. 0.2%, 16.5% vs. 1.2% respectively,  $P<.001$ ). After adjusting for confounders, infection remained independently associated with in-hospital and long-term all-cause death (OR, 13.19, 95% CI: 4.59-37.87; HR, 2.03, 95% CI: 1.52-2.71;  $P<.001$ ) and major bleeding (OR, 10.24; 95% CI: 6.17-16.98; HR, 5.31, 95% CI: 3.49-8.08;  $P<.001$ ). Subgroup analysis

1  
2  
3  
4 confirmed these results.  
5

6 **Conclusions:** The incidence of infection is low in hospitalization, but it is associated  
7  
8  
9 with worse in-hospital and long-term outcomes.  
10

11 **Key Words:** Non-ST-elevation acute coronary syndrome; Percutaneous coronary  
12  
13  
14 intervention; Infection; Outcomes.  
15  
16

17  
18  
19  
20  
21  
22  
23  
24  
25  
26  
27  
28  
29  
30  
31  
32  
33  
34  
35  
36  
37  
38  
39  
40  
41  
42  
43  
44  
45  
46  
47  
48  
49  
50  
51  
52  
53  
54  
55  
56  
57  
58  
59  
60

For peer review only

### Strengths and limitations of this study

- We widely included NSTEMI-ACS patients who received PCI treatment from China.
- The characteristics of infection was detailed reported which included the time and infection type.
- Validation was done in different subgroups and variables which is our best effort based on the database.
- The potential bias may be neglected because of the study design.
- The etiology test of the infection is absent which limited the advanced exploration of the mechanism.

## Introduction

Acute coronary syndrome (ACS) is a leading cause of death both in China and around the world<sup>1</sup>. As compared with STEMI patients, those with non-ST elevation acute coronary syndrome (NSTEMI) have shown improved outcomes after the extensive use of an invasive approach, but continue to show a higher burden of comorbidities and prior cardiovascular events which might expose them to iatrogenic and infective complications.<sup>2</sup> Identification of patients at risk of worse outcomes could contribute to targeted intervention, help direct care, reduce the incidence of subsequent events, and thus optimize resource utilization.

Infection can activate platelets and the coagulation system, resulting in the prothrombotic environment<sup>3, 4</sup>. Moreover, infection is an uncommon but important comorbidity in patients undergoing percutaneous coronary intervention (PCI)<sup>5-7</sup>. Although the reported incidence is less than 4%, infection has been proven to be associated with an increased risk of cardiovascular events among patients with STEMI<sup>8, 9</sup>. However, information about infection in patients with NSTEMI remains scanty. Only one study of 174 octogenarian patients with ACS evaluated the impact of infection on clinical outcomes<sup>10</sup>. Thus, we aimed to assess the incidence of infection and its association with short- and long-term clinical outcomes in NSTEMI patients undergoing PCI.

## Methods

### Study design and patients

This observational cohort study consisted of consecutive NSTEMI patients undergoing PCI from Jan 2010 to Dec 2014 at five hospitals in China. Only patients

1  
2  
3 with adequate information to diagnose or rule out infection were included. Patients were  
4  
5 excluded if they were diagnosed with a malignant tumor or infection before the index  
6  
7 date, pregnant or presenting with cardiogenic shock. The method to search and identify  
8  
9 appropriate NSTEMI-ACS patients has been outlined previously<sup>11</sup>. The study protocol was  
10  
11 approved by the central ethics committee of the Guangdong Provincial People's  
12  
13 Hospital, with a waiver of informed consent. The study was conducted in accordance  
14  
15 with the Declaration of Helsinki.  
16  
17  
18  
19

### 20 **Data collection and procedures**

21  
22 Data on demographics, patient history, laboratory tests, examinations, and medication  
23  
24 history were collected by investigators in the first interview after admission. The  
25  
26 medicines and PCI procedures were applied according to international guidelines and  
27  
28 clinical evidence<sup>12</sup>.  
29  
30  
31  
32

33 Infection during the index hospitalization was diagnosed according to the presence  
34  
35 of any symptoms, signs and/or laboratory indicating infection. Once confirmed by the  
36  
37 infection control doctors service, appropriate antibiotics were prescribed<sup>8</sup>. Infection  
38  
39 was classified as pulmonary, urinary tract infection (UTI) or others (including non-  
40  
41 pulmonary/ non-urinary sepsis and cellulitis), based on the clinical records during  
42  
43 hospitalization. Community-acquired pulmonary infection was defined by a diagnosis  
44  
45 of infection within the first 72 hours of hospital admission, and hospital-acquired  
46  
47 pulmonary infection was defined as those occurring after the first 72 hours and were  
48  
49 diagnosed in accordance with the criteria established by the Centers for Disease Control  
50  
51 and Prevention<sup>13</sup>.  
52  
53  
54  
55  
56  
57  
58

### 59 **Clinical outcomes and follow up**

1  
2  
3  
4 The primary outcome was in-hospital all-cause death and in-hospital major bleeding as  
5  
6 defined by the Bleeding Academic Research Consortium definition (grades 3-5)<sup>14</sup>.  
7  
8  
9 Secondary outcomes were: (1) major adverse clinical events (MACE), consisting of all-  
10  
11 cause death, myocardial infarction, or major bleeding during hospitalization; and (2)  
12  
13 all-cause death or major bleeding during follow-up.  
14  
15

16  
17 All patients were followed-up by trained nurses via telephone interview or clinic  
18  
19 visits from Nov 2015 to Dec 2016. Relevant information was also collected from the  
20  
21 residence registration system and from the clinical records of the patients who were  
22  
23 readmitted. The details of clinical events and follow-up have been previously  
24  
25 described<sup>11</sup>. All adverse clinical events were evaluated by an independent clinical  
26  
27 events committee that was masked to the infection details.  
28  
29  
30

### 31 32 **Statistical analysis**

33  
34 All patients were divided into groups with or without infections. Continuous variables  
35  
36 with a normal distribution are presented as the mean  $\pm$  SD, and those with an  
37  
38 asymmetric distribution are presented as the median and interquartile range (Q25-Q75).  
39  
40 Student's t test or Wilcoxon rank-sum test were used to compare the continuous  
41  
42 variables. Categorical variables are presented as frequencies and were compared by the  
43  
44 Fisher exact test or chi-square test. Univariate and multivariable analyses were  
45  
46 performed to evaluate the relationship between infection and clinical outcomes.  
47  
48 Variables that were significant in the univariate analysis or clinically important were  
49  
50 included in the multivariable models. Considering the low incidence of adverse  
51  
52 outcomes but potential high incidence of confounders, two models were developed for  
53  
54  
55  
56  
57  
58  
59  
60



1  
2  
3  
4 each multivariable analysis. The first model (model 1) included infection, age, anemia,  
5  
6 type of disease (unstable angina and non-ST-elevation acute myocardial infarction),  
7  
8 gender, current smokers, heart failure, and estimate glomerular filtration rate (eGFR).  
9  
10 The second model (model 2) included radial access, cardiac biomarker positive, time  
11  
12 to procedure, treated multi-vessel, diabetes mellitus, hypertension, prior myocardial  
13  
14 infarction, and prior stroke. We performed subgroup analyses by older age, gender,  
15  
16 current smokers, diabetes mellitus, types of disease, heart failure, anemia and chronic  
17  
18 kidney disease. Analysis based on different types of infections was reported. We also  
19  
20 introduced the GRACE (Global Registry of Acute Coronary Events)<sup>15</sup> and CRUSADE  
21  
22 (Can Rapid Risk Stratification of Unstable Angina Patients Suppress Adverse  
23  
24 Outcomes With Early Implementation of the ACC/AHA Guidelines) score<sup>16</sup> and  
25  
26 compared the infection outcomes among different GRACE or CRUSADE risk groups  
27  
28 (low, medium, or high risk). All data analyses were performed with SAS (version 9.4,  
29  
30 SAS Institute, 210 Cary, North Carolina, USA). A two-sided  $P < 0.05$  was considered  
31  
32 significant.  
33  
34  
35  
36  
37  
38  
39  
40  
41  
42

43 Propensity score analyses were conducted to test the robustness of the results. All  
44  
45 factors listed in **Table 1** were considered in the propensity score model development.  
46  
47

48 The heterogeneity analysis between the centers was conducted using meta-analysis  
49  
50 methods.  
51

### 52 **Patient and public involvement**

53  
54 There was no patient or public involvement in any step of this study.  
55  
56

### 57 **Results**

### Baseline characteristic

From January 1, 2010, to December 31, 2014, a total of 8197 consecutive NSTEMI-ACS patients underwent PCI at the 5 hospitals in China. Of the 5215 patients who met the final criteria, 206 (3.95%) received a diagnosis of infection, and 183 (89%) of them occurred within one week after hospital admission (**Figure S1**). **Table 1** shows the baseline characteristics of patients with and without infection. The patients with infection were older and had a low body weight. These patients were more likely to have a history of myocardial infarction, stroke, hypertension and diabetes, and more often had a diagnosis of heart failure, anemia and the use of intra-aortic balloon pump and dual antiplatelet therapy. Patients with infection had lower left ventricular ejection fraction, eGFR but higher GRACE risk scores compared with those without infection. However, the CRUSADE risk score was similar between the two groups.

### In-hospital clinical outcomes

Patients with infection had a higher rate of in-hospital all-cause death (4.4% vs. 0.2%), major bleeding (16.5% vs. 1.2%), and MACE (21.4% vs. 1.7%) compared with patients without infection (all  $P < .001$ ) (**Table 2**). However, the rate of in-hospital myocardial infarction was similar between the two groups ( $P = 0.726$ ).

Univariable analyses showed that infection was a predictor for in-hospital all cause death (odds ratios [OR] 22.96; 95% confidence interval [CI], 9.23-57.14,  $P < .001$ ), major bleeding (OR, 16.30; 95% CI, 10.42-25.50;  $P < .001$ ), and MACE (OR, 14.48; 95%CI, 9.62-21.78;  $P < .001$ ). After adjusting for other confounding variables, multivariable logistic regression showed that infection was significantly and

1  
2  
3  
4 independently related to the risk of the above outcomes (**Figure 1**).

### 6 **Long-term clinical outcomes**

7  
8  
9 At a median follow-up of 3.2 years, Kaplan-Meier analysis revealed that patients with  
10  
11 in-hospital infection had a higher risk of long-term death, major bleeding, and death or  
12  
13 major bleeding compared with those without in-hospital infection ( $P<.001$ ) (**Table 2**,  
14  
15 **Figure 2 and Figure S2**). Multivariable cox analyses demonstrated that infection was  
16  
17 independently associated with long-term adverse outcomes even after adjusting for  
18  
19 other potential risk factors (all cause death: hazard ratio [HR], 2.03; 95% CI, 1.52-2.71;  
20  
21  $P<.001$ ; major bleeding: HR, 5.31; 95% CI, 3.49-8.08;  $P<.001$ ; death or major bleeding:  
22  
23 HR, 2.47; 95% CI, 1.92-3.19;  $P<.001$ ). The similar result was reported in the other  
24  
25 adjusted model (**Figure 1**).

### 32 **Subgroup analyses**

33  
34  
35 Subgroup analyses similarly revealed that infection was independently related to the in-  
36  
37 hospital events (all-cause death, major bleeding, or MACE) according to different  
38  
39 clinical status. The unadjusted and adjusted ORs for infection are presented in **Figure**  
40  
41 **S3, Figure S4, and Figure S5**. Analysis according to the infection subtypes indicated  
42  
43 that pulmonary infection other than UTI was independently associated with poor in-  
44  
45 hospital and follow up clinical outcomes. However, the UTI was independently  
46  
47 associated with all-cause death (**Table S1**).

### 53 **Propensity Score Analyses**

54  
55  
56 We matched 740 patients with or without infection in a 1:4 ratio (**Table S2 and Figure**  
57  
58 **S6**). The result showed a higher rate of major bleeding during the hospital stay (OR,  
59  
60

1  
2  
3  
4 18; 95%CI, 2.40-134.8, P=0.015), and a similar result was found at follow-up (HR,  
5  
6 5.33;95%CI, 1.55-18.30, P=0.007), but matched results showed an absence of a  
7  
8 significant difference in all-cause death (in-hospital: OR, 4.01; 95%CI, 0.25-64.30;  
9  
10 follow-up: OR, 2; 95%CI, 0.97-4.12)(Table S3).

## 14 Discussion

15  
16  
17 This study demonstrates that infection was uncommon in a contemporary cohort  
18  
19 of NSTEMI-ACS patients who underwent PCI. But still the in-hospital infection among  
20  
21 NSTEMI-ACS patients received PCI is significant associated with higher risk of in-  
22  
23 hospital and long-term clinical prognoses, such as all-cause death, major bleeding as  
24  
25 well as the MACE.  
26  
27  
28

29  
30 The prevalence of infection in our study is similar to those results for the STEMI  
31  
32 population. Data from 5,745 STEMI patients enrolled in the APEX-AMI trial  
33  
34 demonstrated that the prevalence of serious infection was 2.4%, and that infection was  
35  
36 associated with higher 90-day mortality (29%)<sup>9</sup>. Also, another study of 1,486 STEMI  
37  
38 patients reported the prevalence of serious infection at 3.9% and the 30-day mortality  
39  
40 was up to 53% in these patients<sup>8</sup>. The conclusions for these 2 studies paralleled our  
41  
42 conclusion: infection is uncommon but associated with worse clinical outcomes. A  
43  
44 recent retrospective cohort analyses of 174 octogenarians with ACS, for whom the  
45  
46 patients with infection had a higher in-hospital, 30-day and long-term mortality than  
47  
48 patients without infection<sup>10</sup>. However, that study was confined to patients older than 85  
49  
50 years who were admitted to the coronary care unit, the different ACS types were never  
51  
52 specified, and the relatively liberal use of bare metal stents does not conform with the  
53  
54  
55  
56  
57  
58  
59  
60

1  
2  
3  
4 contemporary more liberal use of drug eluting stents<sup>17, 18</sup>.  
5

6 To our knowledge, this study is the first to demonstrate the role of infection on  
7  
8 patients with NSTEMI-ACS. Although the prevalence of infections was similar to the  
9  
10 previous studies of STEMI<sup>8, 9</sup>, the 30 and 90-day death rates were lower than those  
11  
12 studies. These low rates might be the result of patient characteristics of our study with  
13  
14 less patients requiring intra-aortic balloon pump support, mechanical ventilation and  
15  
16 transfusion. However, our conclusions paralleled: patients with infections were  
17  
18 associated with worse outcomes. This association remained consistent after the  
19  
20 adjustment of other important potential risk factors for outcomes such as radial access,  
21  
22 cardiac biomarker positive, time to revascularization, and treated multi-vessel.  
23  
24  
25  
26  
27  
28  
29

30 Although infections had a negative impact on patients with NSTEMI-ACS, the  
31  
32 underlying pathophysiologic mechanism remains unclear. Corrales-Medina et al.<sup>19</sup>  
33  
34 suggested that infection increased the mortality of patients who underwent elective PCI  
35  
36 due to the change in plaques triggered by acute inflammatory reactions. Indeed,  
37  
38 infection has been implicated as a factor contributing to initiation, progression and  
39  
40 rupture of an atherosclerotic plaque<sup>20</sup>. Infectious vectors have been reported to induce  
41  
42 the expression of adhesion molecules such as heat shock protein 60 and monocyte  
43  
44 chemoattractant protein-1 on endothelial cells, which can activate the endothelium and  
45  
46 the formation of a lipid core<sup>21-24</sup>. Additionally, the SIXTUS study group<sup>25</sup> demonstrated  
47  
48 that platelet activation and TxB<sub>2</sub> overproduction are related to infections via Toll-like  
49  
50 receptor 4. Moreover, MODICA et al.<sup>26</sup> reported that aspirin non-responsiveness was  
51  
52 often observed in patients with pneumonia. Also, increased coagulation activity has  
53  
54  
55  
56  
57  
58  
59  
60

1  
2  
3  
4 been observed in pneumonia<sup>3</sup>. Therefore, infection can activate platelets and the  
5  
6  
7 coagulation system, which plays a critical role in deteriorating outcomes in patients  
8  
9  
10 with ACS. In contrast to previous STEMI reports<sup>8, 9</sup>, we did not find a significant  
11  
12  
13 association of infection with myocardial infarction due to the low incidence of  
14  
15  
16 myocardial infarction in our study. However, our results were similar to previous  
17  
18  
19 studies that reported major bleeding was more frequent in patients with infection.  
20  
21  
22 Although the PLATelet inhibition and patient Outcomes (PLATO) trial demonstrated  
23  
24  
25 that ticagrelor, a more potent and consistent platelet P2Y<sub>12</sub> inhibitor, was associated  
26  
27  
28 with significantly fewer pulmonary infections and death related to infection than  
29  
30  
31 clopidogrel, the incidence of bleeding in patients with infection in that study was not  
32  
33  
34 reported<sup>4</sup>. Because of dysfunction of platelets and the coagulation system, patients with  
35  
36  
37 infection might be at higher risk of ischemia and bleeding. Therefore, more attention  
38  
39  
40 should be paid to patients with infection when antithrombotic therapy was determined.  
41  
42  
43 Finally, infection can also result in worse outcomes for NSTEMI-ACS patients through  
44  
45  
46 increasing catecholamines and potentially adverse hemodynamic effects, such as  
47  
48  
49 coronary vasoconstriction and increased myocardial metabolic demands<sup>27</sup>.

45  
46 Although UTI was associated to some degree with in-hospital all-cause death, it  
47  
48  
49 was not associated with other worse outcomes. One reason why pulmonary infection is  
50  
51  
52 related to these worse clinical outcomes, while UTI is not, could be the lower  
53  
54  
55 prevalence of UTI comparing to pulmonary infection (0.3% vs. 2.6%). The prevalence  
56  
57  
58 of UTI was lower in our study compared with STEMI patients (0.3% vs. 7%)<sup>8</sup>.  
59  
60 Therefore, when the population sample size was expanded, UTI would be similar to the

1  
2  
3  
4 pulmonary infection related to the worse clinical outcomes.  
5

### 6 **Limitations**

7  
8  
9 The study had several limitations. First, as a retrospective study a causal relationship  
10 between the infection and outcomes could not be determined. Second, despite  
11 adjustment for important confounders, we could not completely eliminate all the  
12 potential bias including selection bias. Third, although the infections were not centrally  
13 adjudicated, the infection was confirmed by the infection control services who were  
14 authorized to approve the use of antibiotic. Furthermore, because there is not a general  
15 screen of infection in all the patients, the infection can be underestimated. But the  
16 symptom-leading diagnose of infection is more practical in real world, and can be  
17 promoted easily in clinic.  
18  
19  
20  
21  
22  
23  
24  
25  
26  
27  
28  
29  
30  
31

### 32 **Conclusions**

33 Infection is an uncommon complication in patients with NSTEMI-ACS undergoing PCI  
34 but is nonetheless independently associated with worse in-hospital and long-term  
35 outcomes. Future studies are indicated to identify NSTEMI-ACS patients at risk of  
36 infection which could then contribute to targeted intervention, help direct care, reduce  
37 the incidence of subsequent adverse events, and thus optimize resource utilization.  
38  
39  
40  
41  
42  
43  
44  
45  
46  
47

### 48 **Acknowledgements**

49 The authors appreciate the efforts of revising the manuscript, Scott J. Denardo, MD,  
50 Reid Heart Center/First Health of Carolinas Cardiac and Vascular Institute, Pinehurst,  
51 NC, USA. We thank the patients who participated in this trial and their relatives; the  
52 clinical and research teams; and the nursing teams in our hospital for their work on the  
53  
54  
55  
56  
57  
58  
59  
60

1  
2  
3  
4 study. Department of Cardiology, Guangdong Cardiovascular Institute, Guangdong  
5  
6 Provincial Key Laboratory of Coronary Heart Disease Prevention, Guangdong  
7  
8 Provincial People's Hospital, Guangdong Academic of Medical Sciences, Guangzhou  
9  
10 510100, China.(Danqing Yu; Jianfang Luo; Zhonghan Ni;Peixia Huo; Qiong Ren;  
11  
12 Yanyan Zhong;Liyun Wang; Jianxia He; Ruijuan Xiao; Yuanling Li; Xinrong Liu; Hui  
13  
14 Wang; Mingyu Chen; Haiyan Xue;Xuxi Yang; Suqin Xie;). Department of Cardiology,  
15  
16 The Second People's Hospital of Nanhai District, Guangdong General Hospital's  
17  
18 Nanhai Hospital, Foshan, 528251, China (Wenfei He).

### 24 25 **Funding**

26  
27 This study was supported by a grant from the Outstanding Young Talent Program of  
28  
29 Guangdong Provincial People's Hospital (grant number: KJ012019084), National  
30  
31 Science Foundation for Young Scientists of China (Grant No. 81800325) and Science  
32  
33 and Technology Planning Project of Guangzhou City (201906010089, 201707010002),  
34  
35 and China Youth Research Funding (2017-CCA-VG-02). The funders had no role in  
36  
37 the study design, data collection and analysis, the decision to publish, or the preparation  
38  
39 of the manuscript. The work was not funded by any industry sponsors. All authors  
40  
41 agreed to submit the manuscript for publication.

### 42 43 **Authors' contributions**

44  
45 P-C He designed and supervised the study; P-Y Chen, Y-H Liu, L Jiang, X-B Wei and  
46  
47 W Guo performed the study, and C-Y Duan analyzed the data; Y-H Liu and other  
48  
49 authors provided the samples and demographics from patients and controls; Y-H Liu  
50  
51 and P-Y Chen wrote the manuscript; N Tan, J-Y Chen and P-C He revised the  
52  
53  
54  
55  
56  
57  
58  
59  
60



1  
2  
3  
4 manuscript for important intellectual content.  
5

### 6 **Conflict of Interest**

7  
8  
9 The authors declared no potential conflicts of interest with respect to the research,  
10 authorship, and/or publication of this article.  
11  
12

### 13 **Ethics approval and consent to participate**

14  
15  
16 The study protocol was approved by the central ethics committee of the Guangdong  
17 Provincial People's Hospital (NO. GDREC2016210H(R1)). Patients were included  
18  
19 with a waiver of informed consent.  
20  
21  
22

23  
24  
25 This article does not contain any studies with animals performed by any of the authors.  
26

### 27 **Data availability statement**

28  
29  
30 Data source for this study is a retrospective public health database with data which all  
31 hospitalizations that were already anonymized. Data were confidentially stored once  
32  
33 the original study published according to the original protocol, but data are available  
34  
35 upon reasonable request.  
36  
37  
38

### 39 **Open access**

40  
41  
42 This is an open access article distributed in accordance with the Creative Commons  
43 Attribution Non Commercial (CC BY-NC 4.0) license, which permits others to  
44  
45 distribute, remix, adapt, build upon this work non-commercially, and license their  
46  
47 derivative works on different terms, provided the original work is properly cited,  
48  
49 appropriate credit is given, any changes made indicated, and the use is non-  
50  
51 commercial.  
52  
53  
54  
55  
56  
57  
58  
59  
60

---

## References

1. Chan, MY, Du X, Eccleston, D, Ma, C, Mohanan, PP, Ogita, M, et al. Acute coronary syndrome in the Asia-Pacific region. *Int J Cardiol.* 2016;202:861-869.
2. Morici N, Savonitto S, Ferri L A, Grosseto D, Bossi I, Sganzerla P, et al. Outcomes of Elderly Patients with ST-Elevation or Non-ST-Elevation Acute Coronary Syndrome Undergoing Percutaneous Coronary Intervention[J]. *The American Journal of Medicine.* 2019; 132(2): 209-216.
3. Milbrandt EB, Reade MC, Lee M, Shook SL, Angus DC, Kong L, et al. Prevalence and significance of coagulation abnormalities in community-acquired pneumonia. *Mol Med.* 2009;15(11-12):438-445.
4. Varenhorst C, Alstrom U, Braun OO, Storey RF, Mahaffey KW, Bertilsson M, et al. Causes of mortality with ticagrelor compared with clopidogrel in acute coronary syndromes. *Heart.* 2014;100(22):1762-1769.
5. Rizos M, Falagas ME, Tsiodras S, Betsou A, Foukas P, Michalopoulos A. Usual interstitial pneumonia associated with cytomegalovirus infection after percutaneous transluminal coronary angioplasty. *Eur J Clin Microbiol.* 2004;23(11):848-850.
6. Alfonso F. Fatal infection after rapamycin eluting coronary stent implantation. *Heart.* 2005;91(6):e51.
7. Ziakas A, Konstantinou V, Giannoglou G, Gemitzis K, Louridas G. Enoxaparin-induced psoas hematoma complicated by Staphylococcus aureus infection after cardiac catheterization. *Thromb Res.* 2006;118(4):535-537.
8. Piccaro DOP, Gonzales V, Lopes RD, Schmidt MM, Garofallo S, Santos RP, et al.

1  
2  
3  
4 Serious infections among unselected patients with ST-elevation myocardial infarction  
5 treated with contemporary primary percutaneous coronary intervention. *Am Heart J.*  
6  
7 2016;181:52-59.  
8

9  
10  
11 **9.**Truffa AA, Granger CB, White KR, Newby LK, Mehta RH, Hochman JS, et al.  
12 Serious infection after acute myocardial infarction: incidence, clinical features, and  
13 outcomes. *JACC Cardiovasc Interv.* 2012;5(7):769-776.  
14  
15

16  
17  
18 **10.**Keskin K, Çetinkal G, Sığırcı S, Yıldız SS, Çetin Ş, Gürdal A, et al. The impact of  
19 infection on mortality in octogenarians who were admitted due to acute coronary  
20 syndrome. *Arch Gerontol Geriat.* 2018;76:48-53.  
21  
22

23  
24  
25 **11.**Chen J, He P, Liu Y, Wei X, Jiang L, Guo W, et al. Association of Parenteral  
26 Anticoagulation Therapy With Outcomes in Chinese Patients Undergoing Percutaneous  
27 Coronary Intervention for Non–ST-Segment Elevation Acute Coronary Syndrome.  
28  
29 *JAMA Intern Med.* 2019;179(2):186.  
30  
31

32  
33  
34 **12.**Roffi M, Patrono C, Collet J, Mueller C, Valgimigli M, Andreotti F, et al. 2015 ESC  
35 Guidelines for the management of acute coronary syndromes in patients presenting  
36 without persistent ST-segment elevation. *Eur Heart J.* 2016;37(3):267-315.  
37  
38

39  
40  
41 **13.** CDC-Center for Disease Control and Prevention. Identifying health care associated  
42 infections (HAI) for NHSN surveillance. Vol 2015:1-14.  
43  
44

45  
46  
47 **14.**Ndrepepa G, Schuster T, Hadamitzky M, Byrne RA, Mehilli J, Neumann FJ, et al.  
48 Validation of the Bleeding Academic Research Consortium definition of bleeding in  
49 patients with coronary artery disease undergoing percutaneous coronary intervention.  
50  
51  
52  
53  
54  
55  
56  
57  
58  
59  
60  
*Circulation.* 2012;125(11):1424-1431.

- 
- 1  
2  
3  
4 **15.**Granger CB, Goldberg RJ, Dabbous O, Pieper KS, Eagle KA, Cannon CP, et al.  
5  
6 Predictors of hospital mortality in the global registry of acute coronary events. *Arch*  
7  
8 *Intern Med.* 2003;163 (19):2345-2353.  
9  
10  
11 **16.**Subherwal S, Bach RG, Chen AY, Gage BF, Rao SV, Newby LK, et al. Baseline  
12  
13 risk of major bleeding in non-ST-segment-elevation myocardial infarction: the  
14  
15 CRUSADE (Can Rapid risk stratification of Unstable angina patients Suppress  
16  
17 ADverse outcomes with Early implementation of the ACC/AHA Guidelines) Bleeding  
18  
19 Score. *Circulation.* 2009;119(14):1873-1882.  
20  
21  
22 **17.**Palmerini T, Genereux P, Caixeta A, Cristea E, Lansky A, Mehran R, et al.  
23  
24 Prognostic value of the SYNTAX score in patients with acute coronary syndromes  
25  
26 undergoing percutaneous coronary intervention: analysis from the ACUITY (Acute  
27  
28 Catheterization and Urgent Intervention Triage StrategY) trial. *J Am Coll Cardiol.*  
29  
30 2011;57(24):2389-2397.  
31  
32  
33 **18.**Sabate M, Brugaletta S, Cequier A, Iniguez A, Serra A, Jimenez-Quevedo P, et al.  
34  
35 Clinical outcomes in patients with ST-segment elevation myocardial infarction treated  
36  
37 with everolimus-eluting stents versus bare-metal stents (EXAMINATION): 5-year  
38  
39 results of a randomised trial. *Lancet.* 2016;387(10016):357-366.  
40  
41  
42 **19.**Corrales-Medina VF, Musher DM, Shachkina S, Chirinos JA. Acute pneumonia and  
43  
44 the cardiovascular system. *Lancet.* 2013;381(9865):496-505.  
45  
46  
47 **20.**Pothineni NVK, Subramany S, Kuriakose K, Shirazi LF, Romeo F, Shah PK, et al.  
48  
49 Infections, atherosclerosis, and coronary heart disease. *Eur Heart J.* 2017;38(43): 3195-  
50  
51 3201.  
52  
53  
54  
55  
56  
57  
58  
59  
60

1  
2  
3  
4 **21.**Hsu YC, Lin JT, Ho HJ, Kao YH, Huang YT, Hsiao NW, et al. Antiviral treatment  
5  
6 for hepatitis C virus infection is associated with improved renal and cardiovascular  
7  
8 outcomes in diabetic patients. *Hepatology*. 2014;59(4):1293-1302.

9  
10  
11 **22.**Huang CY, Shih CM, Tsao NW, Lin YW, Shih CC, Chiang KH, et al. The GroEL  
12  
13 protein of *Porphyromonas gingivalis* regulates atherogenic phenomena in endothelial  
14  
15 cells mediated by upregulating toll-like receptor 4 expression. *Am J Transl Res*.  
16  
17 2016;8(2):384-404.

18  
19  
20 **23.**Lei L, Li H, Yan F, Li Y, Xiao Y. *Porphyromonas gingivalis* lipopolysaccharide  
21  
22 alters atherosclerotic-related gene expression in oxidized low-density-lipoprotein-  
23  
24 induced macrophages and foam cells. *J Periodontal Res*. 2011;46(4):427-437.

25  
26  
27 **24.**Park IW, Wang JF, Groopman JE. HIV-1 Tat promotes monocyte chemoattractant  
28  
29 protein-1 secretion followed by transmigration of monocytes. *Blood*. 2001;97(2):352-  
30  
31 358.

32  
33  
34 **25.**Cangemi R, Casciaro M, Rossi E, Calvieri C, Bucci T, Calabrese CM, et al. Platelet  
35  
36 activation is associated with myocardial infarction in patients with pneumonia. *J Am*  
37  
38 *Coll Cardiol*. 2014;64(18):1917-1925.

39  
40  
41 **26.**Modica A, Karlsson F, Mooe T, Fakulteten M, Medicin IFRF, Universitet U, et al..  
42  
43 Platelet aggregation and aspirin non-responsiveness increase when an acute coronary  
44  
45 syndrome is complicated by an infection. *J Thromb Haemost*.2007; 5(3):507-511.

46  
47  
48 **27.** Corrales-Medina VF, Musher DM, Wells GA, Chirinos JA, Chen L, Fine MJ.  
49  
50 Cardiac complications in patients with community-acquired pneumonia: incidence,  
51  
52 timing, risk factors, and association with short-term mortality. *Circulation*. 2012;125

---

(6):773-781.

For peer review only

---

## Table legends

**Table 1.** The baseline characteristics at index hospitalization

**Table 2.** In-hospital and long-term clinical outcomes

**Table S1.** Univariate and multivariable logistic for clinical outcomes by stratifying infection subtype.

**Table S2** Propensity Score Analyses

**Table S3** Outcomes of Propensity Score Analyses

## Figure legends

**Figure 1.** Univariate and multivariable logistic or Cox analysis for clinical outcomes

**Figure 2.** Kaplan-Meier estimated event rates of all cause death (A) and major bleeding (B)

**Figure S1.** Time from hospital admission to the diagnosis of infection among all patients.

**Figure S2.** Kaplan-Meier estimated event rates of all cause death or major bleeding

**Figure S3.** Subgroup analysis of in-hospital all cause death

**Figure S4.** Subgroup analysis of in-hospital major bleeding

**Figure S5.** Subgroup analysis of in-hospital major adverse clinical events

**Figure S6.** Distributions of propensity scores between the two groups before and after matching (the first row is the density plots and the second row is the QQ plots)

**Table 1. The baseline characteristics at index hospitalization**

|                                                   | All patients*          |                     |                   | <i>P</i><br>value |
|---------------------------------------------------|------------------------|---------------------|-------------------|-------------------|
|                                                   | Uninfected<br>(N=5009) | Infected<br>(N=206) | Total<br>(N=5215) |                   |
| <b>Demographics</b>                               |                        |                     |                   |                   |
| Age, y                                            | 63.61 ± 10.30          | 70.86 ± 9.20        | 63.90 ± 10.36     | <.001             |
| Age ≥ 65 y                                        | 2380(47.5%)            | 157(76.2%)          | 2537(48.6%)       | <.001             |
| Female                                            | 1229(24.5%)            | 54(26.2%)           | 1283(24.6%)       | 0.584             |
| Weight, kg                                        | 65.69 ± 11.67          | 63.55 ± 12.22       | 65.60 ± 11.70     | 0.011             |
| Heart rate, bpm                                   | 73.81 ± 10.91          | 77.75 ± 15.62       | 73.96 ± 11.16     | <.001             |
| Blood pressure, mmHg                              |                        |                     |                   |                   |
| Systolic                                          | 133.37 ± 19.03         | 136.60 ± 22.99      | 133.50 ± 19.21    | 0.049             |
| Diastolic                                         | 76.99 ± 11.27          | 75.81 ± 12.56       | 76.95 ± 11.32     | 0.188             |
| <b>Medical history and risk factors,<br/>n(%)</b> |                        |                     |                   |                   |
| Current Smoker                                    | 1306(26.1%)            | 53(25.7%)           | 1359(26.1%)       | 0.912             |
| Cardiac arrest                                    | 8(0.2%)                | 0(0.0%)             | 8(0.2%)           | 0.566             |
| Myocardial Infarction                             | 784(15.7%)             | 53(25.7%)           | 837(16.0%)        | <.001             |
| Percutaneous coronary intervention                | 940(18.8%)             | 35(17.0%)           | 975(18.7%)        | 0.522             |
| Coronary-artery bypass surgery                    | 70(1.4%)               | 5(2.4%)             | 75(1.4%)          | 0.224             |
| Stroke                                            | 302(6.0%)              | 23(11.2%)           | 325(6.2%)         | 0.003             |
| Atrial Fibrillation                               | 125(2.5%)              | 8(3.9%)             | 133(2.6%)         | 0.216             |
| Hypertension                                      | 3259(65.1%)            | 157(76.2%)          | 3416(65.5%)       | <.001             |
| Diabetes mellitus                                 | 1509(30.1%)            | 96(46.6%)           | 1605(30.8%)       | <.001             |
| <b>Presentation characteristics</b>               |                        |                     |                   |                   |



|                                        | All patients*          |                     |                   | <i>P</i><br>value |
|----------------------------------------|------------------------|---------------------|-------------------|-------------------|
|                                        | Uninfected<br>(N=5009) | Infected<br>(N=206) | Total<br>(N=5215) |                   |
| IABP                                   | 44(0.9%)               | 30(14.6%)           | 74(1.4%)          | <.001             |
| CRUSAD                                 | 42.12 ± 12.04          | 40.66 ± 13.19       | 42.06 ± 12.09     | 0.097             |
| GRACE                                  | 124.54 ± 27.67         | 143.75 ± 29.82      | 125.17 ± 27.94    | <.001             |
| Type of disease, n(%)                  |                        |                     |                   |                   |
| NSTEMI                                 | 3121(62.3%)            | 131(63.6%)          | 3252(62.4%)       | 0.709             |
| Unstable angina                        | 1888(37.7%)            | 75(36.4%)           | 1963(37.6%)       |                   |
| Heart Failure, n(%)                    | 489(9.8%)              | 66(32.0%)           | 555(10.6%)        | <.001             |
| LVEF, %                                | 61.79 ± 10.77          | 55.99 ± 13.71       | 61.54 ± 10.98     | <.001             |
| eGFR, mL/min/1.73m <sup>2</sup>        | 81.64 ± 24.99          | 60.85 ± 28.14       | 80.81 ± 25.45     | <.001             |
| eGFR ≤ 60, n(%)                        | 851(17.0%)             | 101(49.0%)          | 952(18.3%)        | <.001             |
| Serum creatinine, µmol/dL              | 1.05 ± 0.69            | 1.55 ± 1.28         | 1.07 ± 0.73       | <.001             |
| Hematocrit, g/L                        | 0.39 ± 0.05            | 0.35 ± 0.06         | 0.39 ± 0.05       | <.001             |
| Anemia, n(%)                           | 1605(32.0%)            | 127(61.7%)          | 1732(33.2%)       | <.001             |
| Cardiac biomarker positive, n(%)       | 2984(62.3%)            | 120(61.5%)          | 3104(62.2%)       | 0.836             |
| <b>In hospital medication, n(%)</b>    |                        |                     |                   |                   |
| Dual antiplatelet therapy              | 4845(96.7%)            | 194(94.2%)          | 5039(96.6%)       | 0.047             |
| Statin                                 | 4909(98.0%)            | 202(98.1%)          | 5074(97.3%)       | 0.956             |
| ACE inhibitor or ARB                   | 3939(78.6%)            | 170(82.5%)          | 4109(78.8%)       | 0.181             |
| Calcium-channel blocker                | 1066(21.3%)            | 72(35.0%)           | 1138(21.8%)       | <.001             |
| β-blocker                              | 4245(84.7%)            | 165(80.1%)          | 4410(84.6%)       | 0.070             |
| <b>Procedure characteristics, n(%)</b> |                        |                     |                   |                   |

|                         | All patients*          |                     |                   | <i>P</i><br>value |
|-------------------------|------------------------|---------------------|-------------------|-------------------|
|                         | Uninfected<br>(N=5009) | Infected<br>(N=206) | Total<br>(N=5215) |                   |
| Radial access           | 4470(89.2%)            | 154(74.8%)          | 4624(88.7%)       | <.001             |
| Coronary anatomy        |                        |                     |                   |                   |
| Any left main           | 690(13.8%)             | 49(23.8%)           | 739(14.2%)        | <.001             |
| Multi-vessel disease    | 3072(61.3%)            | 127(61.7%)          | 3199(61.3%)       |                   |
| Others                  | 1247(24.9%)            | 30(14.6%)           | 1277(24.5%)       |                   |
| Treated vessel          |                        |                     |                   |                   |
| Any left main           | 480(9.6%)              | 35(17.0%)           | 515(9.9%)         | 0.002             |
| Multi-vessel            | 1764(35.2%)            | 66(32.0%)           | 1830(35.1%)       | .                 |
| Others                  | 2765(55.2%)            | 105(51.0%)          | 2870(55.0%)       | .                 |
| Stent type              |                        |                     |                   |                   |
| Drug eluting stent      | 5004(99.9%)            | 206(100.0%)         | 5210(99.9%)       | 0.902             |
| Bare metal stent        | 2(0.0%)                | 0(0.0%)             | 2(0.0%)           | .                 |
| PTCA or aspiration only | 3(0.1%)                | 0(0.0%)             | 3(0.1%)           | .                 |
| Number of stents        | 2(1~3)                 | 2(1~3)              | 2(1~3)            | 0.048             |
| Total length of stents  | 45(27~71)              | 48 (31~76)          | 45(27~71)         | 0.053             |
| Thrombus aspiration     | 61(1.2%)               | 5(2.4%)             | 66(1.3%)          | 0.128             |
| Time to procedure       | 1(1~2)                 | 2(1~6)              | 1(1~2)            | <.001             |
| In 24 hours             | 2817(56.2%)            | 81(39.3%)           | 2898(55.6%)       | <.001             |
| 24~72 hours             | 1505(30.0%)            | 47(22.8%)           | 1552(29.8%)       | .                 |
| > 72 hours              | 687(13.7%)             | 78(37.9%)           | 765(14.7%)        | .                 |
| In-hospital days        | 4(3~6)                 | 11(7~18)            | 4(3~6)            | <.001             |

\*Abbreviations: IABP=intra-aortic balloon pump; GRACE=Global Registry of Acute

---

1  
2  
3  
4 Coronary Events; CRUSADE=Can Rapid Risk Stratification of Unstable Angina  
5  
6 Patients Suppress Adverse Outcomes With Early Implementation of the ACC/AHA  
7  
8 Guidelines; NSTEMI=Non-ST elevation myocardial infarction; LVEF=left ventricular  
9  
10 ejection fraction; eGFR=Estimate glomerular filtration rate; PTCA=Percutaneous  
11  
12 transluminal coronary angioplasty. ACE=angiotensin-converting enzyme;  
13  
14  
15  
16  
17 ARB=angiotensin receptor blocker.  
18  
19  
20  
21  
22  
23  
24  
25  
26  
27  
28  
29  
30  
31  
32  
33  
34  
35  
36  
37  
38  
39  
40  
41  
42  
43  
44  
45  
46  
47  
48  
49  
50  
51  
52  
53  
54  
55  
56  
57  
58  
59  
60

For peer review only

**Table 2 In-hospital and Long-term clinical outcomes**

| <b>Outcomes</b>                                  | <b>Uninfected<br/>(N=5009)</b> | <b>Infected<br/>(N=206)</b> | <b>P value</b> |
|--------------------------------------------------|--------------------------------|-----------------------------|----------------|
| <b>In-hospital outcomes</b>                      |                                |                             |                |
| Death*                                           | 10(0.2%)                       | 9(4.4%)                     | <.001          |
| Myocardial infarction                            | 17(0.3%)                       | 1(0.5%)                     | 0.726          |
| Death or myocardial infarction                   | 27(0.5%)                       | 10(4.9%)                    | <.001          |
| Major bleeding                                   | 62(1.2%)                       | 34(16.5%)                   | <.001          |
| Death or Myocardial infarction or major bleeding | 84(1.7%)                       | 44(21.4%)                   | <.001          |
| <b>Long-term outcomes</b>                        |                                |                             |                |
| <b>30 days</b>                                   |                                |                             |                |
| Death                                            | 17(0.3%)                       | 10(4.9%)                    | <.001          |
| Major bleeding                                   | 61(1.2%)                       | 31(15.0%)                   | <.001          |
| Death or major bleeding                          | 74(1.5%)                       | 37(18.0%)                   | <.001          |
| <b>One year</b>                                  |                                |                             |                |
| Death                                            | 93(1.9%)                       | 35(17.0%)                   | <.001          |
| Major bleeding                                   | 75(1.5%)                       | 34(16.5%)                   | <.001          |
| Death or major bleeding                          | 161(3.2%)                      | 56(27.2%)                   | <.001          |
| <b>Three years</b>                               |                                |                             |                |
| Death                                            | 346(6.9%)                      | 61(29.6%)                   | <.001          |
| Major bleeding                                   | 111(2.2%)                      | 36(17.5%)                   | <.001          |
| Death or major bleeding                          | 437(8.7%)                      | 81(39.3%)                   | <.001          |

\*All cause death;



Figure 1. Univariate and multivariable logistic or Cox analysis for clinical outcomes

423x225mm (300 x 300 DPI)



Figure 2. Kaplan-Meier estimated event rates of all cause death (A) and major bleeding (B)

1  
2  
3  
4  
5  
6  
7  
8  
9  
10  
11  
12  
13  
14  
15  
16  
17  
18  
19  
20  
21  
22  
23  
24  
25  
26  
27  
28  
29  
30  
31  
32  
33  
34  
35  
36  
37  
38  
39  
40  
41  
42  
43  
44  
45  
46  
47  
48  
49  
50  
51  
52  
53  
54  
55  
56  
57  
58  
59  
60

**Supplementary Appendix 1**

For peer review only

1  
2  
3  
4  
5 **Table S1.** Univariate and multivariable logistic for clinical outcomes by stratifying infection  
6  
7 subtype.  
8  
9

10 **Table S2** Propensity Score Analyses  
11  
12

13 **Table S3** Outcomes of Propensity Score Analyses  
14  
15

16 **Figure S1.** Time from hospital admission to the diagnosis of infection among all patients.  
17  
18

19 **Figure S2.** Kaplan-Meier estimated event rates of all cause death or major bleeding  
20  
21

22 **Figure S3.** Subgroup analysis of in-hospital all cause death  
23  
24

25 **Figure S4.** Subgroup analysis of in-hospital major bleeding  
26  
27

28 **Figure S5.** Subgroup analysis of in-hospital major adverse clinical events  
29  
30

31 **Figure S6.** Distributions of propensity scores between the two groups before and after matching  
32  
33 (the first row is the density plots and the second row is the QQ plots)  
34  
35  
36  
37  
38  
39  
40  
41  
42  
43  
44  
45  
46  
47  
48  
49  
50  
51  
52  
53  
54  
55  
56  
57  
58  
59  
60



**Table S1 Univariate and multivariable logistic for clinical outcomes by stratifying infection subtype.**

| Outcomes<br>(Compare with uninfected patients) | Univariate analysis |             |         | Multivariable analysis |             |        |
|------------------------------------------------|---------------------|-------------|---------|------------------------|-------------|--------|
|                                                | OR                  | 95%CI       | P value | OR                     | 95%CI       | Pvalue |
| <b>Model 1</b>                                 |                     |             |         |                        |             |        |
| <b>In hospital</b>                             |                     |             |         |                        |             |        |
| <b>Death</b>                                   |                     |             |         |                        |             |        |
| Community acquired pulmonary infections        | 17.24               | 4.66~63.73  | <.001   | 8.56                   | 2.06~35.57  | 0.003  |
| Hospital acquired pulmonary infections         | 23.25               | 4.95~109.28 | <.001   | 11.51                  | 2.15~61.49  | 0.004  |
| Urinary tract infection                        | 31.24               | 3.78~258.58 | 0.001   | 21.59                  | 2.32~200.48 | 0.007  |
| Other infection                                | 29.99               | 8.01~112.27 | <.001   | 23.14                  | 5.59~95.86  | <.001  |
| <b>Major Bleeding</b>                          |                     |             |         |                        |             |        |
| Community acquired pulmonary infections        | 28.32               | 16.54~48.48 | <.001   | 18.13                  | 9.92~33.16  | <.001  |
| Hospital acquired pulmonary infections         | 14.80               | 6.37~34.43  | <.001   | 9.04                   | 3.63~22.49  | <.001  |
| Urinary tract infection                        | 5.16                | 0.67~39.50  | 0.114   | 3.10                   | 0.39~24.51  | 0.283  |
| Other infection                                | 4.95                | 1.50~16.31  | 0.009   | 3.25                   | 0.95~11.13  | 0.061  |
| <b>Death or MI or Major Bleeding</b>           |                     |             |         |                        |             |        |
| Community acquired pulmonary infections        | 21.85               | 13.05~36.59 | <.001   | 14.23                  | 8.07~25.10  | <.001  |
| Hospital acquired pulmonary infections         | 16.69               | 8.01~34.77  | <.001   | 11.28                  | 5.14~24.76  | <.001  |
| Urinary tract infection                        | 3.76                | 0.49~28.65  | 0.202   | 2.44                   | 0.31~19.04  | 0.396  |
| Other infection                                | 6.26                | 2.43~16.13  | <.001   | 4.51                   | 1.69~12.01  | 0.003  |
| <b>Follow up</b>                               |                     |             |         |                        |             |        |
| <b>Death</b>                                   |                     |             |         |                        |             |        |
| Community acquired pulmonary infections        | 5.52                | 3.78~8.06   | <.001   | 2.06                   | 1.39~3.06   | <.001  |
| Hospital acquired pulmonary infections         | 6.16                | 3.78~10.02  | <.001   | 2.57                   | 1.56~4.24   | <.001  |
| Urinary tract infection                        | 3.66                | 1.37~9.82   | 0.010   | 2.38                   | 0.88~6.39   | 0.086  |
| Other infection                                | 2.62                | 1.44~4.79   | 0.002   | 1.45                   | 0.79~2.66   | 0.232  |
| <b>Major Bleeding</b>                          |                     |             |         |                        |             |        |
| Community acquired pulmonary infections        | 14.29               | 9.26~22.06  | <.001   | 8.86                   | 5.49~14.27  | <.001  |
| Hospital acquired pulmonary infections         | 7.08                | 3.30~15.20  | <.001   | 4.16                   | 1.87~9.27   | <.001  |

| Outcomes<br>(Compare with uninfected patients) | Univariate analysis |             |         | Multivariable analysis |             |        |
|------------------------------------------------|---------------------|-------------|---------|------------------------|-------------|--------|
|                                                | OR                  | 95%CI       | P value | OR                     | 95%CI       | Pvalue |
| Urinary tract infection                        | 2.54                | 0.35~18.13  | 0.354   | 1.66                   | 0.23~11.98  | 0.616  |
| Other infection                                | 2.49                | 0.79~7.83   | 0.119   | 1.83                   | 0.57~5.85   | 0.307  |
| <b>Death or Major Bleeding</b>                 |                     |             |         |                        |             |        |
| Community acquired pulmonary infections        | 6.83                | 4.99~9.35   | <.001   | 2.85                   | 2.05~3.97   | <.001  |
| Hospital acquired pulmonary infections         | 6.32                | 4.08~9.79   | <.001   | 2.93                   | 1.87~4.61   | <.001  |
| Urinary tract infection                        | 2.85                | 1.07~7.64   | 0.037   | 1.78                   | 0.66~4.78   | 0.253  |
| Other infection                                | 2.62                | 1.51~4.55   | 0.001   | 1.60                   | 0.92~2.80   | 0.099  |
| <b>Model 2</b>                                 |                     |             |         |                        |             |        |
| <b>In hospital</b>                             |                     |             |         |                        |             |        |
| <b>Death</b>                                   |                     |             |         |                        |             |        |
| Community acquired pulmonary infections        | 17.24               | 4.66~63.73  | <.001   | 2.01                   | 0.37~10.86  | 0.418  |
| Hospital acquired pulmonary infections         | 23.25               | 4.95~109.28 | <.001   | 6.48                   | 0.92~45.66  | 0.061  |
| Urinary tract infection                        | 31.24               | 3.78~258.58 | 0.001   | 14.68                  | 0.96~223.51 | 0.053  |
| Other infection                                | 29.99               | 8.01~112.27 | <.001   | 5.02                   | 0.98~25.62  | 0.052  |
| <b>Major Bleeding</b>                          |                     |             |         |                        |             |        |
| Community acquired pulmonary infections        | 28.32               | 16.54~48.48 | <.001   | 11.91                  | 6.10~23.28  | <.001  |
| Hospital acquired pulmonary infections         | 14.80               | 6.37~34.43  | <.001   | 7.47                   | 2.80~19.90  | <.001  |
| Urinary tract infection                        | 5.16                | 0.67~39.50  | 0.114   | 1.92                   | 0.15~25.23  | 0.619  |
| Other infection                                | 4.95                | 1.50~16.31  | 0.009   | 1.05                   | 0.26~4.23   | 0.942  |
| <b>Death or MI or Major Bleeding</b>           |                     |             |         |                        |             |        |
| Community acquired pulmonary infections        | 21.85               | 13.05~36.59 | <.001   | 9.69                   | 5.12~18.37  | <.001  |
| Hospital acquired pulmonary infections         | 16.69               | 8.01~34.77  | <.001   | 10.00                  | 4.33~23.12  | <.001  |
| Urinary tract infection                        | 3.76                | 0.49~28.65  | 0.202   | 1.59                   | 0.13~19.16  | 0.713  |
| Other infection                                | 6.26                | 2.43~16.13  | <.001   | 1.71                   | 0.54~5.35   | 0.360  |
| <b>Follow up</b>                               |                     |             |         |                        |             |        |
| <b>Death</b>                                   |                     |             |         |                        |             |        |
| Community acquired pulmonary infections        | 5.52                | 3.78~8.06   | <.001   | 2.70                   | 1.81~4.03   | <.001  |
| Hospital acquired pulmonary infections         | 6.16                | 3.78~10.02  | <.001   | 3.56                   | 2.15~5.90   | <.001  |
| Urinary tract infection                        | 3.66                | 1.37~9.82   | 0.010   | 2.90                   | 1.08~7.80   | 0.034  |

| Outcomes<br>(Compare with uninfected patients) | Univariate analysis |            |         | Multivariable analysis |            |        |
|------------------------------------------------|---------------------|------------|---------|------------------------|------------|--------|
|                                                | OR                  | 95%CI      | P value | OR                     | 95%CI      | Pvalue |
| Other infection                                | 2.62                | 1.44~4.79  | 0.002   | 1.32                   | 0.71~2.44  | 0.376  |
| <b>Major Bleeding</b>                          | 14.29               | 9.26~22.06 | <.001   | 6.30                   | 3.79~10.49 | <.001  |
| Community acquired pulmonary infections        | 7.08                | 3.30~15.20 | <.001   | 3.51                   | 1.57~7.84  | 0.002  |
| Hospital acquired pulmonary infections         | 2.54                | 0.35~18.13 | 0.354   | 1.42                   | 0.19~10.39 | 0.731  |
| Urinary tract infection                        | 2.49                | 0.79~7.83  | 0.119   | 1.01                   | 0.31~3.29  | 0.981  |
| Other infection                                |                     |            |         |                        |            |        |
| <b>Death or Major Bleeding</b>                 |                     |            |         |                        |            |        |
| Community acquired pulmonary infections        | 6.83                | 4.99~9.35  | <.001   | 3.55                   | 2.55~4.94  | <.001  |
| Hospital acquired pulmonary infections         | 6.32                | 4.08~9.79  | <.001   | 3.46                   | 2.20~5.45  | <.001  |
| Urinary tract infection                        | 2.85                | 1.07~7.64  | 0.037   | 1.96                   | 0.73~5.28  | 0.181  |
| Other infection                                | 2.62                | 1.51~4.55  | 0.001   | 1.38                   | 0.78~2.41  | 0.266  |

Model 1 included age, gender, current smokers, heart failure, anemia, type of disease, estimate glomerular filtration rate.

Model 2 included diabetes mellitus, hypertension, prior myocardial infarction, prior stroke, radial access, chronic kidney disease, intra-aortic balloon pump.

**Table S2 Propensity Score Analyses**

|                                               | Propensity Score Analyses |              |              |                |
|-----------------------------------------------|---------------------------|--------------|--------------|----------------|
|                                               | Uninfected                | Infected     | Total        | <i>P</i> value |
|                                               | (N=592)                   | (N=148)      | (N=740)      |                |
| <b>Demographics</b>                           |                           |              |              |                |
| Age, y                                        | 70.39±9.09                | 70.24±9.15   | 70.36±9.09   | 0.861          |
| Age ≥ 65 y                                    | 444(75.0%)                | 110(74.3%)   | 554(74.9%)   | 0.865          |
| Female                                        | 166(28.0%)                | 37(25.0%)    | 203(27.4%)   | 0.458          |
| Weight, kg                                    | 63.25±12.22               | 63.99±12.03  | 63.40±12.18  | 0.510          |
| Heart rate, bpm                               | 75.01±12.30               | 75.37±12.80  | 75.08±12.40  | 0.751          |
| <b>Blood pressure, mmHg</b>                   |                           |              |              |                |
| Systolic                                      | 137.48±21.34              | 137.12±21.66 | 137.41±21.39 | 0.854          |
| Diastolic                                     | 76.07±11.68               | 76.00±11.13  | 76.06±11.56  | 0.944          |
| <b>Medical history and risk factors, n(%)</b> |                           |              |              |                |
| Current Smoker                                | 157(26.5%)                | 41(27.7%)    | 198(26.8%)   | 0.771          |
| Myocardial Infarction                         | 126(21.3%)                | 29(19.6%)    | 155(20.9%)   | 0.651          |
| Percutaneous coronary intervention            | 100(16.9%)                | 25(16.9%)    | 125(16.9%)   | 1              |
| Coronary-artery bypass surgery                | 10(1.7%)                  | 4(2.7%)      | 14(1.9%)     | 0.418          |
| Stroke                                        | 36(6.1%)                  | 9(6.1%)      | 45(6.1%)     | 1              |
| Atrial Fibrillation                           | 19(3.2%)                  | 5(3.4%)      | 24(3.2%)     | 0.917          |
| Hypertension                                  | 445(75.2%)                | 111(75.0%)   | 556(75.1%)   | 0.966          |
| Diabetes mellitus                             | 248(41.9%)                | 67(45.3%)    | 315(42.6%)   | 0.457          |
| <b>Type of disease, n(%)</b>                  |                           |              |              |                |
| NSTEMI                                        | 225(38.0%)                | 60(40.5%)    | 285(38.5%)   | 0.571          |
| Unstable angina                               | 367(62.0%)                | 88(59.5%)    | 455(61.5%)   | NA             |
| Heart Failure, n(%)                           | 123(20.8%)                | 32(21.6%)    | 155(20.9%)   | 0.821          |

| <b>Propensity Score Analyses</b> |                   |                 |                |                       |
|----------------------------------|-------------------|-----------------|----------------|-----------------------|
|                                  | <b>Uninfected</b> | <b>Infected</b> | <b>Total</b>   | <b><i>P</i> value</b> |
|                                  | <b>(N=592)</b>    | <b>(N=148)</b>  | <b>(N=740)</b> |                       |
| LVEF, %                          | 59.67±12.02       | 57.81±13.16     | 59.29±12.28    | 0.118                 |
| eGFR, mL/min/1.73m <sup>2</sup>  | 65.65±26.10       | 66.66±28.13     | 65.85±26.50    | 0.678                 |
| eGFR ≤ 60, n(%)                  | 234(39.5%)        | 58(39.2%)       | 292(39.5%)     | 0.940                 |
| Serum creatinine, μmol/dL        | 1.39±1.16         | 1.43±1.32       | 1.40±1.19      | 0.726                 |
| Hematocrit, g/L                  | 0.36±0.05         | 0.37±0.05       | 0.36±0.05      | 0.690                 |
| Anemia, n(%)                     | 337(56.9%)        | 81(54.7%)       | 418(56.5%)     | 0.630                 |
| Cardiac biomarker positive, n(%) | 344(61.5%)        | 84(59.2%)       | 428(61.1%)     | 0.603                 |
| In hospital medication, n(%)     |                   |                 |                |                       |
| Dual antiplatelet therapy        | 558(94.3%)        | 138(93.2%)      | 696(94.1%)     | 0.641                 |
| Statin                           | 576(97.3%)        | 145(98.0%)      | 721(97.4%)     | 0.642                 |
| ACE inhibitor or ARB             | 487(82.3%)        | 123(83.1%)      | 610(82.4%)     | 0.809                 |
| Calcium-channel blocker          | 200(33.8%)        | 46(31.1%)       | 246(33.2%)     | 0.532                 |
| β-blocker                        | 488(82.4%)        | 120(81.1%)      | 608(82.2%)     | 0.701                 |
| Procedure characteristics, n(%)  |                   |                 |                |                       |
| Radial access                    | 486(82.1%)        | 116(78.4%)      | 602(81.4%)     | 0.299                 |
| Coronary anatomy                 |                   |                 |                |                       |
| Any left main                    | 117(19.8%)        | 26(17.6%)       | 143(19.3%)     | 0.786                 |
| Multi-vessel disease             | 363(61.3%)        | 95(64.2%)       | 458(61.9%)     |                       |
| Others                           | 112(18.9%)        | 27(18.2%)       | 139(18.8%)     |                       |
| Treated vessel                   |                   |                 |                |                       |
| Any left main                    | 77(13.0%)         | 17(11.5%)       | 94(12.7%)      | 0.708                 |
| Multi-vessel                     | 209(35.3%)        | 49(33.1%)       | 258(34.9%)     |                       |
| Others                           | 306(51.7%)        | 82(55.4%)       | 388(52.4%)     |                       |

---

**Propensity Score Analyses**


---

|                          | <b>Uninfected</b> | <b>Infected</b> | <b>Total</b>   | <b><i>P</i> value</b> |
|--------------------------|-------------------|-----------------|----------------|-----------------------|
|                          | <b>(N=592)</b>    | <b>(N=148)</b>  | <b>(N=740)</b> |                       |
| <b>Stent type</b>        |                   |                 |                |                       |
| Drug eluting stent       | 592(100.0%)       | 148(100.0%)     | 740(100.0%)    | 1                     |
| Number of stents         | 2.26±1.29         | 2.27±1.38       | 2.26±1.31      | 0.933                 |
| Total length of stents   | 56.48±35.90       | 58.22±38.71     | 56.83±36.46    | 0.604                 |
| Thrombus aspiration      | 16(2.7%)          | 3(2.0%)         | 19(2.6%)       | 0.642                 |
| <b>Time to procedure</b> |                   |                 |                |                       |
| In 24 hours              | 253(42.7%)        | 59(39.9%)       | 312(42.2%)     | 0.816                 |
| 24~72 hours              | 135(22.8%)        | 35(23.6%)       | 170(23.0%)     |                       |
| > 72 hours               | 204(34.5%)        | 54(36.5%)       | 258(34.9%)     |                       |

---

\*Abbreviations: NSTEMI=Non-ST elevation myocardial infarction; LVEF=left ventricular ejection fraction; eGFR=Estimate glomerular filtration rate; ACE=angiotensin-converting enzyme; ARB=angiotensin receptor blocker.

**Table S3 Outcomes of Propensity Score Analyses**

| <b>Outcomes</b>                     | <b>Logistics analysis</b> |              |                |
|-------------------------------------|---------------------------|--------------|----------------|
|                                     | <b>OR/HR</b>              | <b>95%CI</b> | <b>P value</b> |
| In-hospital Death                   | 4.01                      | 0.25~64.30   | 0.981          |
| In-hospital Major bleeding          | 18                        | 2.40~134.8   | 0.005          |
| In-hospital MI                      | 2.0                       | 0.18~22.20   | 0.57           |
| In-hospital Death or Major bleeding | 17.24                     | 4.66~63.73   | <.001          |
| Follow-up Death                     | 2                         | 0.97~4.12    | 0.06           |
| Follow-up Major bleeding            | 5.33                      | 1.55~18.30   | 0.007          |
| Follow-up Death or Major bleeding   | 2.46                      | 1.29~4.69    | 0.006          |

**Figure S1.** Time from hospital admission to the diagnosis of infection among all patients.





**Figure S2.** Kaplan-Meier estimated event rates of all cause death or major bleeding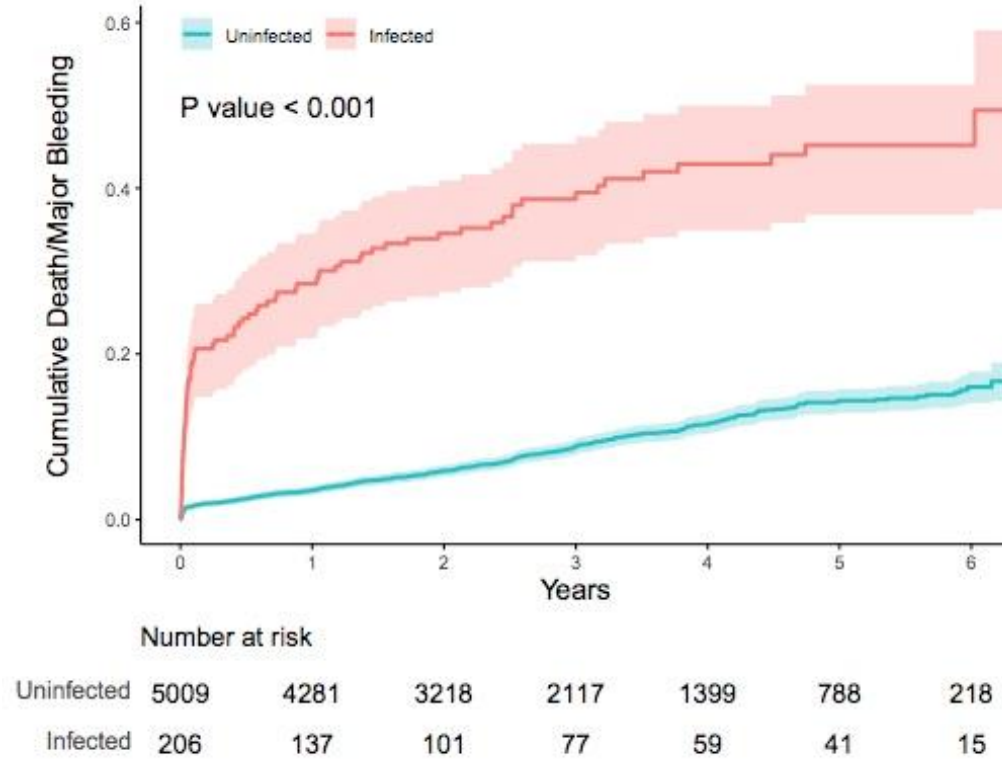

Figure S3. Subgroup analysis of in-hospital all cause death

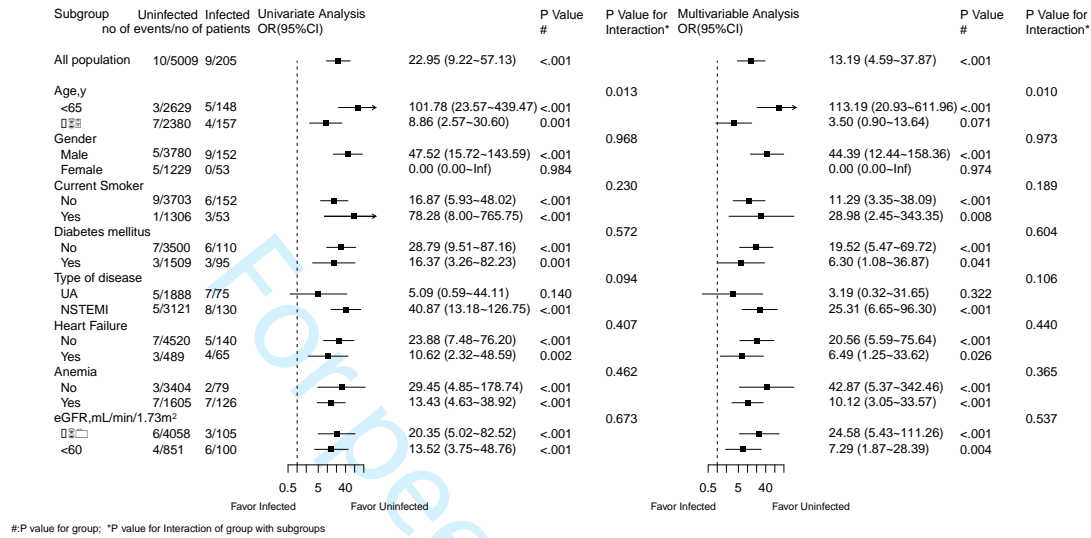

Figure S4. Subgroup analysis of in-hospital major bleeding



Figure S5. Subgroup analysis of in-hospital major adverse clinical events

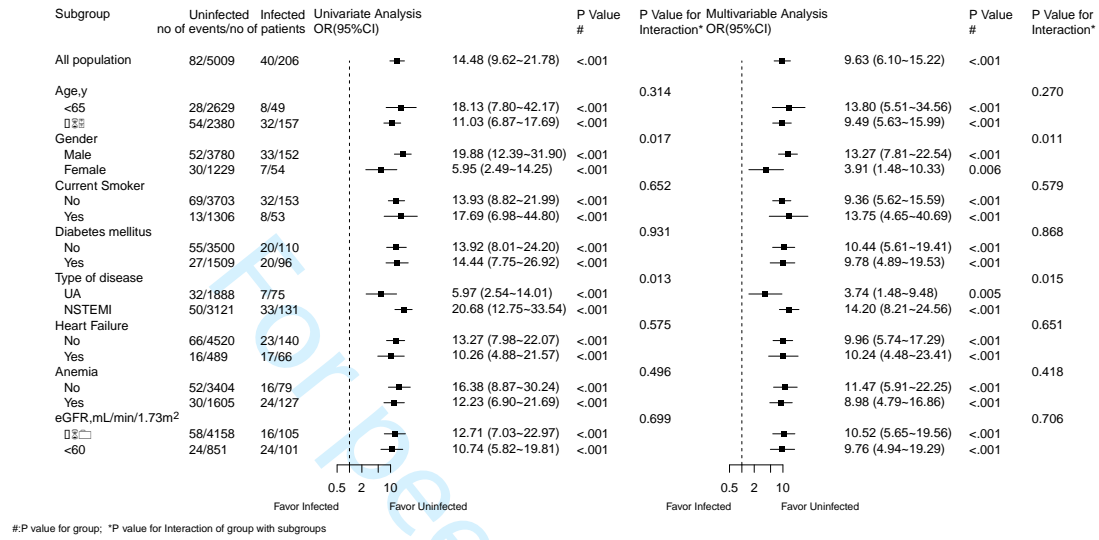

**Figure S6.** Distributions of propensity scores between the two groups before and after matching (the first row is the density plots and the second row is the QQ plots)



STROBE Statement—Checklist of items that should be included in reports of *cohort studies*

|                           | Item No | Recommendation                                                                                                                                                                                                                                                                                                         | Page No          |
|---------------------------|---------|------------------------------------------------------------------------------------------------------------------------------------------------------------------------------------------------------------------------------------------------------------------------------------------------------------------------|------------------|
| <b>Title and abstract</b> | 1       | (a) Indicate the study's design with a commonly used term in the title or the abstract<br>(b) Provide in the abstract an informative and balanced summary of what was done and what was found                                                                                                                          | 1<br>3-4         |
| <b>Introduction</b>       |         |                                                                                                                                                                                                                                                                                                                        |                  |
| Background/rationale      | 2       | Explain the scientific background and rationale for the investigation being reported                                                                                                                                                                                                                                   | 6                |
| Objectives                | 3       | State specific objectives, including any prespecified hypotheses                                                                                                                                                                                                                                                       | 6                |
| <b>Methods</b>            |         |                                                                                                                                                                                                                                                                                                                        |                  |
| Study design              | 4       | Present key elements of study design early in the paper                                                                                                                                                                                                                                                                | 7                |
| Setting                   | 5       | Describe the setting, locations, and relevant dates, including periods of recruitment, exposure, follow-up, and data collection                                                                                                                                                                                        | 7                |
| Participants              | 6       | (a) Give the eligibility criteria, and the sources and methods of selection of participants. Describe methods of follow-up<br>(b) For matched studies, give matching criteria and number of exposed and unexposed                                                                                                      | 7<br>NA          |
| Variables                 | 7       | Clearly define all outcomes, exposures, predictors, potential confounders, and effect modifiers. Give diagnostic criteria, if applicable                                                                                                                                                                               | 7-8 & supplement |
| Data sources/measurement  | 8*      | For each variable of interest, give sources of data and details of methods of assessment (measurement). Describe comparability of assessment methods if there is more than one group                                                                                                                                   | supplement       |
| Bias                      | 9       | Describe any efforts to address potential sources of bias                                                                                                                                                                                                                                                              | 8-9              |
| Study size                | 10      | Explain how the study size was arrived at                                                                                                                                                                                                                                                                              | 7                |
| Quantitative variables    | 11      | Explain how quantitative variables were handled in the analyses. If applicable, describe which groupings were chosen and why                                                                                                                                                                                           | 8                |
| Statistical methods       | 12      | (a) Describe all statistical methods, including those used to control for confounding<br>(b) Describe any methods used to examine subgroups and interactions<br>(c) Explain how missing data were addressed<br>(d) If applicable, explain how loss to follow-up was addressed<br>(e) Describe any sensitivity analyses | 8-9 & supplement |
| <b>Results</b>            |         |                                                                                                                                                                                                                                                                                                                        |                  |
| Participants              | 13*     | (a) Report numbers of individuals at each stage of study—eg numbers potentially eligible, examined for eligibility, confirmed eligible, included in the study, completing follow-up, and analysed<br>(b) Give reasons for non-participation at each stage<br>(c) Consider use of a flow diagram                        | 9-10             |
| Descriptive data          | 14*     | (a) Give characteristics of study participants (eg demographic, clinical, social) and information on exposures and potential confounders<br>(b) Indicate number of participants with missing data for each variable of interest<br>(c) Summarise follow-up time (eg, average and total amount)                         | 9-10             |

|    |                          |     |                                                                                           |                       |
|----|--------------------------|-----|-------------------------------------------------------------------------------------------|-----------------------|
| 1  | Outcome data             | 15* | Report numbers of outcome events or summary measures over time                            | 9-10                  |
| 2  | Main results             | 16  | (a) Give unadjusted estimates and, if applicable, confounder-adjusted estimates and       | 10-11 &<br>supplement |
| 3  |                          |     | their precision (eg, 95% confidence interval). Make clear which confounders were          |                       |
| 4  |                          |     | adjusted for and why they were included                                                   |                       |
| 5  |                          |     | (b) Report category boundaries when continuous variables were categorized                 |                       |
| 6  |                          |     | (c) If relevant, consider translating estimates of relative risk into absolute risk for a |                       |
| 7  |                          |     | meaningful time period                                                                    |                       |
| 8  | Other analyses           | 17  | Report other analyses done—eg analyses of subgroups and interactions, and                 | 11 &<br>supplement    |
| 9  |                          |     | sensitivity analyses                                                                      |                       |
| 10 | <b>Discussion</b>        |     |                                                                                           |                       |
| 11 | Key results              | 18  | Summarise key results with reference to study objectives                                  | 11-12                 |
| 12 | Limitations              | 19  | Discuss limitations of the study, taking into account sources of potential bias or        | 14                    |
| 13 |                          |     | imprecision. Discuss both direction and magnitude of any potential bias                   |                       |
| 14 | Interpretation           | 20  | Give a cautious overall interpretation of results considering objectives, limitations,    | 14-15                 |
| 15 |                          |     | multiplicity of analyses, results from similar studies, and other relevant evidence       |                       |
| 16 | Generalisability         | 21  | Discuss the generalisability (external validity) of the study results                     | 14-15                 |
| 17 | <b>Other information</b> |     |                                                                                           |                       |
| 18 | Funding                  | 22  | Give the source of funding and the role of the funders for the present study and, if      | 15-16                 |
| 19 |                          |     | applicable, for the original study on which the present article is based                  |                       |

\*Give information separately for exposed and unexposed groups.

**Note:** An Explanation and Elaboration article discusses each checklist item and gives methodological background and published examples of transparent reporting. The STROBE checklist is best used in conjunction with this article (freely available on the Web sites of PLoS Medicine at <http://www.plosmedicine.org/>, Annals of Internal Medicine at <http://www.annals.org/>, and Epidemiology at <http://www.epidem.com/>). Information on the STROBE Initiative is available at <http://www.strobe-statement.org>.
